# Supplementary material for: Nickel-catalyzed alkoxycarbonylation of aryl iodides with 1 atm CO
Source: Royal Society of Chemistry journal article supplement (doi:10.1039/d2cc00876a), 2022-01-01

## Supporting Information

### **Nickel-catalyzed Alkoxy carbonylation of Aryl Iodides with 1 atm CO**

Ning Liu,<sup>†</sup> Xianqing Wu,<sup>†</sup> Chenglong Wang, Jingping Qu and Yifeng Chen\*

Key Laboratory for Advanced Materials and Joint International Research Laboratory of Precision Chemistry and Molecular Engineering, Feringa Nobel Prize Scientist Joint Research Center, Frontiers Science Center for Materiobiology and Dynamic Chemistry, School of Chemistry and Molecular Engineering, East China University of Science and Technology 130 Meilong Road, Shanghai, 200237 (China)

<sup>†</sup>N.L. and X.W. contributed equally.

**E-mail:** [yifengchen@ecust.edu.cn](mailto:yifengchen@ecust.edu.cn)

## Table of Contents

|                                                                                                |     |
|------------------------------------------------------------------------------------------------|-----|
| General Information.....                                                                       | S3  |
| Detailed Optimization of 4-CF <sub>3</sub> C <sub>6</sub> H <sub>4</sub> I.....                | S4  |
| Experimental Procedures and Characterization Data for Products.....                            | S5  |
| General Procedures for Nickel-catalyzed Alkoxy carbonylation of Aryl Iodide with 1 atm CO..... | S5  |
| Characterization Data.....                                                                     | S6  |
| Procedure for Synthesis of the <b>3a</b> on a 1.0 mmol-scale.....                              | S16 |
| References.....                                                                                | S17 |
| NMR Spectrum.....                                                                              | S18 |

## General Information

All catalytic reactions were carried out using oven dried glassware unless otherwise stated. Ni(cod)<sub>2</sub> (CAS 1295-35-8) was purchased from Sinocompound; 1,10-Phenanthroline (CAS 66-71-7) was purchased from 9dingchem; DPEphos(CAS 166330-10-5) was purchased from TCI; K<sub>2</sub>CO<sub>3</sub>(CAS 584-08-7) was purchased from 9dingchem; Reactions were monitored by thin-layer chromatography (TLC) carried out on 0.20 mm Huanghai silica gel plates (HSGF 254) using UV light as the visualizing agent. All new compounds were characterized by means of GC, <sup>1</sup>H NMR, <sup>13</sup>C NMR, <sup>19</sup>F NMR and HRMS. GC analysis was performed on Agilent Technologies 7820A GC system. GC runs were performed with the following method: inlet temperature 100 °C; column temperature 100 °C for 1 min, then 50 °C/min to 250 °C, then 250 °C for 6 min. NMR spectra were recorded using a Bruker AVANCE III 400 MHz NMR spectrometer and can be found at the end of the paper. High-resolution mass spectra (HRMS) were recorded on Waters Xevo G2 TOF MS (ESI), JEOL AccuTOF LC-plus 4G (**3d**, **3s**, **3q**) and Agilent Technologies 7250 GCQTOF(**3h**). All <sup>1</sup>H NMR data are reported in δ units, parts per million (ppm), and were calibrated relative to the signals for residual chloroform (7.26 ppm) in deuteriochloroform (CDCl<sub>3</sub>). All <sup>13</sup>C NMR data are reported in ppm relative to CDCl<sub>3</sub> (77.16 ppm). <sup>19</sup>F NMR was recorded on a Bruker AVANCE III 400 NMR spectrometer (CFC<sub>3</sub> as an external standard and low field is positive) and were obtained with <sup>1</sup>H decoupling. The following abbreviations or combinations were used to explain the multiplicities: s = singlet, d = doublet, t = triplet, q = quartet, quint = quintet, sext = sextet, sept = septet, m = multiplet.

## Detailed optimization of 4-CF<sub>3</sub>C<sub>6</sub>H<sub>4</sub>I<sup>a</sup>

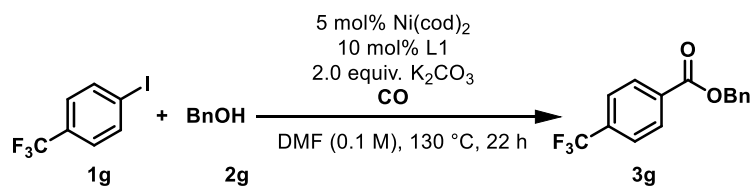

| Entry | Ligand | Solvent | 3a(%) <sup>b</sup>    |
|-------|--------|---------|-----------------------|
| 1     | L1     | DMF     | 10%                   |
| 2     | L2     | DMF     | 14%                   |
| 3     | L3     | DMF     | 6%                    |
| 4     | L4     | DMF     | 62%(57%) <sup>c</sup> |
| 5     | L5     | DMF     | 47%                   |
| 6     | L1     | DMSO    | 3%                    |
| 7     | L4     | DMSO    | -                     |
| 8     | L4     | DMA     | 22%                   |

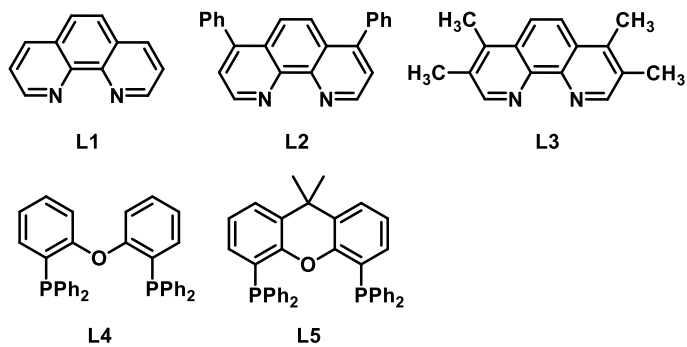

<sup>a</sup>Reaction conditions: **1a** (0.20 mmol), **2a** (0.30 mmol), Ni(cod)<sub>2</sub> (0.01 mmol), **L** (0.02 mmol) and **CO** (1 atm) in the indicate solvent (2.0 mL) at 130 °C for 22 h. <sup>b</sup>Determined by GC analysis with dodecane as the internal standard. <sup>c</sup>Isolated yield.



**General Procedure A for Nickel-catalyzed Alkoxy carbonylation Reaction of Aryl Iodides with 1 atm CO:**

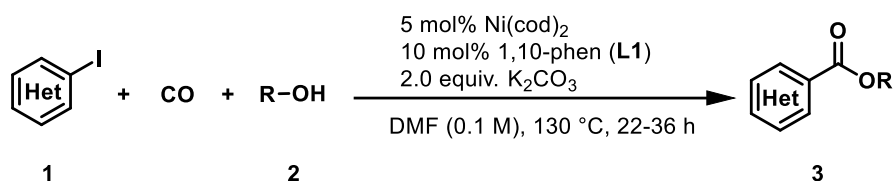

To an oven-dried 30 mL reaction tube, aryl iodide (1.0 equiv. 0.20 mmol), K<sub>2</sub>CO<sub>3</sub> (2.0 equiv. 0.40 mmol, 55.3 mg), 1,10-Phenanthroline (10 mol%, 0.02 mmol, 3.6 mg) were added. Then the tube was transferred into glovebox and Ni(cod)<sub>2</sub> (5 mol%, 0.01 mmol, 2.8 mg) was added. The tube was evacuated and backfilled with CO. DMF (2.0 mL) and alcohol (1.5 equiv. 0.30 mmol) were added in sequence. The reaction was stirred at 130 °C for 22 h, then the reaction was quenched with saturated aqueous solution of NH<sub>4</sub>Cl. The mixture was extracted with ethyl acetate and washed with water for 3 times respectively. The combined organic layer was dried over Na<sub>2</sub>SO<sub>4</sub>, filtered and then concentrated under reduced pressure to give the crude residual, which was purified by flash column chromatography (SiO<sub>2</sub>) to yield the product 3.

**General Procedure B for Nickel-catalyzed Alkoxy carbonylation Reaction of Aryl Iodides with 1 atm CO:**

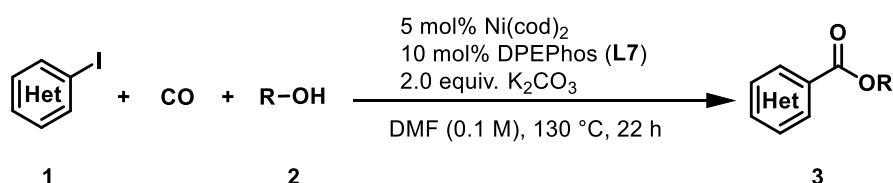

To an oven-dried 30 mL reaction tube, aryl iodide (1.0 equiv. 0.20 mmol), K<sub>2</sub>CO<sub>3</sub> (2.0 equiv. 0.40 mmol, 55.3 mg), DPEphos (10 mol%, 0.02 mmol, 10.8 mg) were added. Then the tube was transferred into glovebox and Ni(cod)<sub>2</sub> (5 mol%, 0.01 mmol, 2.8 mg) was added. The tube was evacuated and equipped with a CO balloon. DMF (2.0 mL) and alcohol (1.5 equiv. 0.30 mmol) were added in sequence. The reaction was stirred at 130 °C for 22 h, then the reaction was quenched with saturated aqueous solution of NH<sub>4</sub>Cl. The mixture was extracted with ethyl acetate for 3 times, and washed with water for 3 times. The combined organic layer was dried over Na<sub>2</sub>SO<sub>4</sub>, filtered and then concentrated under reduced pressure. The crude product was purified by flash column chromatography (SiO<sub>2</sub>) to yield the product 3.

**General procedure C for Nickel-catalyzed alkoxy carbonylation reaction of aryl iodides with 1 atm CO:**

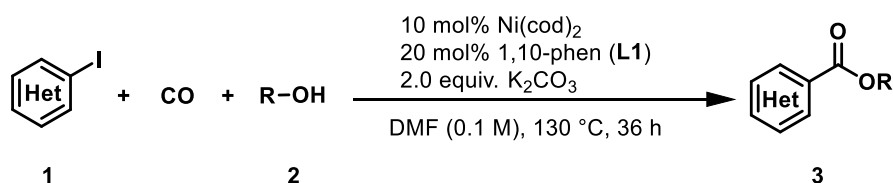

To an oven-dried 30 mL reaction tube, aryl iodide (1.0 equiv. 0.20 mmol), K<sub>2</sub>CO<sub>3</sub> (2.0 equiv. 0.40 mmol, 55.3 mg), 1,10-Phenanthroline (20 mol%, 0.04 mmol, 7.2 mg) were added. Then the tube was transferred into glovebox and Ni(cod)<sub>2</sub> (10 mol%, 0.02 mmol, 5.6 mg) was added. The tube was evacuated and equipped with a CO balloon. DMF (2.0 mL) and alcohol (1.5 equiv. 0.30 mmol) were added in sequence. The reaction was

stirred at 130 °C for 36 h, then the reaction was quenched with saturated aqueous solution of NH<sub>4</sub>Cl. The mixture was extracted with ethyl acetate for 3 times, and washed with water for 3 times. The combined organic layer was dried over Na<sub>2</sub>SO<sub>4</sub>, filtered and then concentrated under reduced pressure. The crude product was purified by flash column chromatography (SiO<sub>2</sub>) to yield the product **3**.

## Characterization data of products:

### Benzyl 4-methoxybenzoate (**3a**)

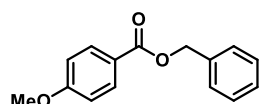

General procedure A was followed on 0.2 mmol scale with 22 h and purification by flash column chromatography on silica gel (PE/EtOAc = 20/1) afforded **3a** as a light-yellow oil (38.8 mg, 80%).  $R_f = 0.30$  (PE/EtOAc = 20/1); **<sup>1</sup>H NMR** (400 MHz, CDCl<sub>3</sub>):  $\delta$  8.06–8.02 (m, 2H), 7.45(d,  $J = 7.2$  Hz, 2H), 7.41–7.34 (m, 3H), 6.94–6.90 (m, 2H), 5.34 (s, 2H), 3.86 (s, 3H); **<sup>13</sup>C NMR** (100 MHz, CDCl<sub>3</sub>):  $\delta$  166.3, 163.5, 136.4, 131.9, 128.7, 128.3, 128.2, 122.6, 113.7, 66.5, 55.5;

The spectral data are consistent with those reported in the literature.<sup>1</sup>

### Benzyl 3-methoxybenzoate (**3b**)

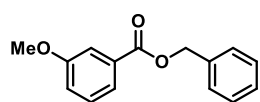

General procedure A was followed on 0.2 mmol scale with 36 h and purification by flash column chromatography on silica gel (PE/EtOAc = 20/1) afforded **3b** as a light-yellow oil (27.1 mg, 56%).  $R_f = 0.44$  (PE/EtOAc = 20/1); **<sup>1</sup>H NMR** (400 MHz, CDCl<sub>3</sub>):  $\delta$  7.68 (d,  $J = 8.0$  Hz, 1H), 7.60 (dd,  $J = 2.8, 1.2$  Hz, 1H), 7.47–7.45 (m, 2H), 7.42–7.33 (m, 4H), 7.11 (dd,  $J = 8.4, 2.0$  Hz, 1H), 5.37 (s, 2H), 3.85 (s, 3H); **<sup>13</sup>C NMR** (100 MHz, CDCl<sub>3</sub>):  $\delta$  166.5, 159.7, 136.1, 131.5, 129.5, 128.7, 128.4, 128.3, 122.2, 119.6, 114.3, 66.9, 55.6;

The spectral data are consistent with those reported in the literature.<sup>2</sup>

### Benzyl 4-(benzyloxy) benzoate (**3c**)

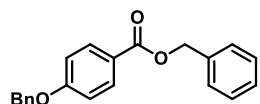

General procedure A was followed on 0.2 mmol scale and purification by flash column chromatography on silica gel (PE/EtOAc = 30/1) afforded **3c** as a white solid (45.1 mg, 71%).  $R_f = 0.40$  (PE/EtOAc = 30/1); **<sup>1</sup>H NMR** (400 MHz, CDCl<sub>3</sub>):  $\delta$  8.05 (d,  $J = 8.8$  Hz, 2H), 7.47–7.33 (m, 10H), 7.00 (d,  $J = 8.8$  Hz, 2H), 5.35 (s, 2H), 5.12 (s, 2H); **<sup>13</sup>C NMR** (100 MHz, CDCl<sub>3</sub>): 166.3, 162.7, 136.4, 136.3, 131.9, 128.8, 128.7, 128.3, 128.3, 128.2, 127.6, 122.8, 114.6, 70.2, 66.5;

The spectral data are consistent with those reported in the literature.<sup>3</sup>

### Benzyl 2,3-dihydrobenzo [1,4] dioxine-6-carboxylate (**3d**)

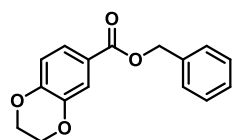

General procedure A was followed on 0.2 mmol scale with 36 h and purification by flash column chromatography on silica gel (PE/EtOAc = 20/1) afforded **3d** as a yellow oil (38.5 mg, 71%).  $R_f = 0.32$  (PE/EtOAc = 20/1); **<sup>1</sup>H NMR** (400 MHz, CDCl<sub>3</sub>):  $\delta$  7.61–7.59 (m, 2H), 7.45–7.43 (m, 2H), 7.40–7.32 (m, 3H), 6.90–6.87 (m, 1H), 5.33 (s, 2H), 4.31–4.25 (m, 4H); **<sup>13</sup>C NMR** (100 MHz, CDCl<sub>3</sub>):  $\delta$  166.0, 148.0, 143.3, 136.3, 128.7, 128.2, 128.2, 123.7, 123.5, 119.2, 117.2, 66.6, 64.7, 64.2; **HRMS (ESI)**: [M+Na]<sup>+</sup> Calcd for C<sub>16</sub>H<sub>14</sub>O<sub>4</sub>Na<sup>+</sup>: 293.0784; found: 293.0791.

### Benzyl 4-(dimethylamino) benzoate (**3e**)

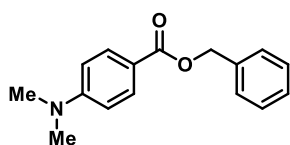

General procedure A was followed on 0.2 mmol scale with 36 h and purification by flash column chromatography on silica gel (PE/EtOAc = 20/1) afforded **3e** as a white solid (33.4 mg, 65%).  $R_f = 0.22$  (PE/EtOAc = 20/1);  $^1\text{H NMR}$  (400 MHz,  $\text{CDCl}_3$ ):  $\delta$  7.99-7.95 (m, 2H), 7.47-7.45 (m, 2H), 7.41-7.37 (m, 2H), 7.35-7.31 (m, 1H), 6.67-6.63 (m, 2H), 5.34 (s, 2H), 3.04 (s, 6H);  $^{13}\text{C NMR}$  (100 MHz,  $\text{CDCl}_3$ ):  $\delta$  166.9, 153.5, 136.9, 131.5, 128.6, 128.1, 128.0, 116.9, 110.8, 66.0, 40.1;

The spectral data are consistent with those reported in the literature.<sup>4</sup>

#### Benzyl 4-(trifluoromethoxy) benzoate (**3f**)

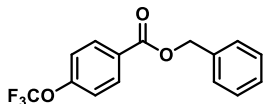

General procedure B was followed on 0.2 mmol scale with 22 h and purification by flash column chromatography on silica gel (PE/EtOAc = 20/1) afforded **3f** as a light-yellow oil (37.0 mg, 63%).  $R_f = 0.56$  (PE/EtOAc = 20/1);  $^1\text{H NMR}$  (400 MHz,  $\text{CDCl}_3$ ):  $\delta$  8.11 (d,  $J = 8.4$  Hz, 2H), 7.44-7.34 (m, 5H), 7.25 (d,  $J = 8.0$  Hz, 2H), 5.36 (s, 2H);  $^{13}\text{C NMR}$  (100 MHz,  $\text{CDCl}_3$ ):  $\delta$  165.4, 152.8 (q,  $J_{\text{C-F}} = 1.4$  Hz), 135.9, 131.8, 128.8, 128.6, 128.5, 128.4, 120.4, 120.4 (q,  $J_{\text{C-F}} = 257.2$  Hz), 67.1.  $^{19}\text{F NMR}$  (376 MHz,  $\text{CDCl}_3$ ):  $\delta$  -57.6.

The spectral data are consistent with those reported in the literature.<sup>5</sup>

#### Benzyl 4-(trifluoromethyl) benzoate (**3g**)

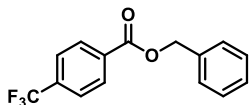

General procedure B was followed on 0.2 mmol scale with 22 h and purification by flash column chromatography on silica gel (PE/EtOAc = 20/1) afforded **3g** as a yellow oil (32.1 mg, 57%).  $R_f = 0.67$  (PE/EtOAc = 20/1);  $^1\text{H NMR}$  (400 MHz,  $\text{CDCl}_3$ ):  $\delta$  8.19 (d,  $J = 8.0$  Hz, 2H), 7.71 (d,  $J = 8.4$  Hz, 2H), 7.47-7.35 (m, 5H), 5.40 (s, 2H);  $^{13}\text{C NMR}$  (100 MHz,  $\text{CDCl}_3$ ):  $\delta$  165.4, 135.7, 134.7 (q,  $J_{\text{C-F}} = 32.6$  Hz), 133.5, 130.3, 128.8, 128.6, 128.5, 125.6 (q,  $J_{\text{C-F}} = 3.7$  Hz), 123.8 (q,  $J_{\text{C-F}} = 271.4$  Hz), 67.4.  $^{19}\text{F NMR}$  (376 MHz,  $\text{CDCl}_3$ ):  $\delta$  -63.1.

The spectral data are consistent with those reported in the literature.<sup>1</sup>

#### Benzyl 4-fluoro-3-methylbenzoate (**3h**)

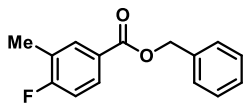

General procedure B was followed on 0.2 mmol scale and purification by flash column chromatography on silica gel (PE/EtOAc = 50/1) afforded **3h** as a colorless oil (28.8 mg, 59%).  $R_f = 0.66$  (PE/EtOAc = 50/1);  $^1\text{H NMR}$  (400 MHz,  $\text{CDCl}_3$ ):  $\delta$  7.95-7.90 (m, 2H), 7.46-7.34 (m, 5H), 7.04 (t,  $J = 8.8$  Hz, 1H), 5.35 (s, 2H), 2.31 (s, 3H);  $^{13}\text{C NMR}$  (100 MHz,  $\text{CDCl}_3$ ):  $\delta$  165.9, 164.5 (d,  $J_{\text{C-F}} = 251.0$  Hz), 136.1, 133.5 (d,  $J_{\text{C-F}} = 6.4$  Hz), 129.7 (d,  $J_{\text{C-F}} = 9.4$  Hz), 128.8, 128.4, 128.4, 126.1 (d,  $J_{\text{C-F}} = 3.3$  Hz), 125.3 (d,  $J_{\text{C-F}} = 18.0$  Hz), 115.3 (d,  $J_{\text{C-F}} = 23.1$  Hz), 66.9, 14.6 (d,  $J_{\text{C-F}} = 3.5$  Hz).  $^{19}\text{F NMR}$  (376 MHz,  $\text{CDCl}_3$ ):  $\delta$  -109.8. **HRMS (EI)**: Calcd for  $\text{C}_{15}\text{H}_{13}\text{FO}_2$ : 244.0894; found: 244.0889.

#### Benzyl 3-chlorobenzoate (**3i**)

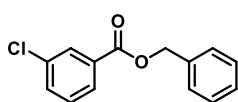

General procedure B was followed on 0.2 mmol scale with 22 h and purification by flash column chromatography on silica gel (PE/EtOAc = 50/1~20/1) afforded **3i** as a light-yellow oil (28.8 mg, 59%).  $R_f = 0.7$  (PE/EtOAc = 20/1);  $^1\text{H NMR}$  (400 MHz,  $\text{CDCl}_3$ ):

$\delta$  8.05 (s, 1H), 7.96 (d,  $J$  = 8.0 Hz, 1H), 7.53 (d,  $J$  = 8.4 Hz, 1H), 7.46–7.34 (m, 6H), 5.37 (s, 2H);  $^{13}\text{C}$  NMR (100 MHz,  $\text{CDCl}_3$ ):  $\delta$  165.4, 135.8, 134.7, 133.2, 132.0, 129.9, 129.9, 128.8, 128.6, 128.4, 128.0, 67.2.

The spectral data are consistent with those reported in the literature.<sup>2</sup>

#### Benzyl (S)-4-chloro-3-((tetrahydrofuran-3-yl) oxy) benzyl benzoate (3j)

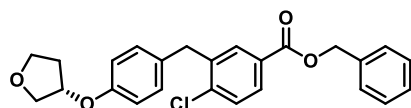

General procedure B was followed on 0.2 mmol scale with 22 h and purification by flash column chromatography on silica gel (PE/EtOAc = 20/1~5/1) afforded **3j** as a yellow oil (61.6 mg, 73%).  $R_f$  = 0.39 (PE/EtOAc = 5/1);  $^1\text{H}$  NMR (400 MHz,  $\text{CDCl}_3$ ):  $\delta$  7.89 (d,  $J$  = 2.0 Hz,

1H), 7.86 (dd,  $J$  = 8.4, 2.4 Hz, 1H), 7.43 (d,  $J$  = 8.4 Hz, 1H), 7.40–7.34 (m, 5H), 7.09 (d,  $J$  = 8.4 Hz, 2H), 6.79 (d,  $J$  = 8.8 Hz, 2H), 5.33 (s, 2H), 4.90–4.86 (m, 1H), 4.07 (s, 2H), 4.00–3.94 (m, 3H), 3.89 (td,  $J$  = 8.0, 4.8 Hz, 1H), 2.23–2.11 (m, 2H);  $^{13}\text{C}$  NMR (100 MHz,  $\text{CDCl}_3$ ):  $\delta$  165.8, 156.1, 139.5, 135.9, 132.3, 131.2, 130.1, 129.9, 128.9, 128.7, 128.7, 128.4, 128.3, 127.1, 115.5, 77.4, 73.2, 67.3, 67.0, 38.4, 33.1 HRMS (ESI):  $[\text{M}+\text{Na}]^+$  Calcd for  $\text{C}_{25}\text{H}_{23}\text{ClO}_4\text{Na}^+$ : 445.1177; found: 445.1168.

#### Benzyl 4-methylbenzoate (3k)

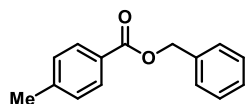

General procedure A was followed on 0.2 mmol scale with 36 h and purification by flash column chromatography on silica gel (PE/EtOAc = 50/1~30/1) afforded **3k** as a light-yellow oil (31.6 mg, 70%).  $R_f$  = 0.57 (PE/EtOAc = 30/1);  $^1\text{H}$  NMR (400 MHz,  $\text{CDCl}_3$ ):  $\delta$  7.98 (d,  $J$  = 8.0 Hz, 2H), 7.46 (d,  $J$  = 7.2 Hz, 2H), 7.41–7.33 (m, 3H), 7.24 (d,  $J$  = 8.4 Hz, 2H), 5.36 (s, 2H), 2.41 (s, 3H);  $^{13}\text{C}$  NMR (100 MHz,  $\text{CDCl}_3$ ):  $\delta$  166.7, 143.9, 136.3, 129.9, 129.2, 128.7, 128.3, 128.3, 127.5, 66.5, 21.8.

The spectral data are consistent with those reported in the literature.<sup>1</sup>

#### Benzyl (1,1'-biphenyl)-4-carboxylate (3l)

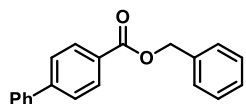

General procedure A was followed on 0.2 mmol scale with 36 h and purification by flash column chromatography on silica gel (PE/EtOAc = 30/1~20/1) afforded **3l** as a white solid (34.9 mg, 61%).  $R_f$  = 0.56 (PE/EtOAc = 20/1);  $^1\text{H}$  NMR (400 MHz,  $\text{CDCl}_3$ ):  $\delta$  8.15 (d,  $J$  = 8.4 Hz, 2H), 7.66 (d,  $J$  = 8.4 Hz, 2H), 7.62 (d,  $J$  = 8.4 Hz, 2H), 7.49–7.45 (m, 4H), 7.43–7.34 (m, 4H), 5.40 (s, 2H);  $^{13}\text{C}$  NMR (100 MHz,  $\text{CDCl}_3$ ): 166.5, 145.9, 140.1, 136.2, 130.4, 129.1, 129.0, 128.7, 128.4, 128.3, 128.3, 127.4, 127.2, 66.8.

The spectral data are consistent with those reported in the literature.<sup>6</sup>

#### Benzyl 2-methylbenzoate (3m)

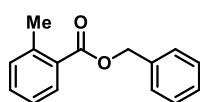

General procedure C was followed on 0.2 mmol scale with 22 h and purification by flash column chromatography on silica gel (PE/EtOAc = 50/1~20/1) afforded **3m** as a light-yellow solid (24.5 mg, 54%).  $R_f$  = 0.66 (PE/EtOAc = 20/1);  $^1\text{H}$  NMR (400 MHz,  $\text{CDCl}_3$ ):  $\delta$  7.96 (d,  $J$  = 7.6 Hz, 1H), 7.45 (d,  $J$  = 7.6 Hz, 2H), 7.41–7.32 (m, 4H), 7.24 (t,  $J$  = 7.6 Hz, 2H), 5.35 (s, 2H), 2.61 (s, 3H);  $^{13}\text{C}$  NMR (100 MHz,  $\text{CDCl}_3$ ):  $\delta$  167.5, 140.5, 136.3, 132.2, 131.8, 130.8, 129.6, 128.7, 128.3, 125.9, 66.6, 21.9.

The spectral data are consistent with those reported in the literature.<sup>1</sup>

#### Benzyl 9,9-dimethyl-9H-fluorene-2-carboxylate (3n)

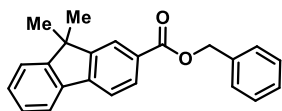

General procedure B was followed on 0.2 mmol scale with 22 h and purification by flash column chromatography on silica gel (PE/EtOAc = 20/1) afforded **3n** as a light-yellow oil (44.1 mg, 67%).  $R_f$  = 0.48 (PE/EtOAc = 20/1);  $^1\text{H NMR}$  (400 MHz,  $\text{CDCl}_3$ ):  $\delta$  8.16 (s, 1H), 8.11 (d,  $J$  = 8.0 Hz, 1H), 7.80–7.76 (m, 2H), 7.51–7.47 (m, 3H), 7.44–7.35 (m, 5H), 5.42 (s, 2H), 1.52 (s, 6H);  $^{13}\text{C NMR}$  (100 MHz,  $\text{CDCl}_3$ ):  $\delta$  166.9, 154.8, 153.7, 144.2, 138.1, 136.4, 129.3, 128.8, 128.7, 128.6, 128.4, 128.4, 127.3, 124.2, 122.9, 121.0, 119.8, 66.8, 47.1, 27.0; **HRMS (ESI)**:  $[\text{M}+\text{Na}]^+$  Calcd for  $\text{C}_{23}\text{H}_{20}\text{O}_2\text{Na}^+$ : 351.1356; found: 351.1346.

#### Benzyl 1H-indole-5-carboxylate (**3o**)

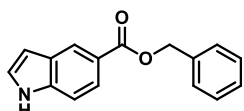

General procedure A was followed on 0.2 mmol scale with 22 h and purification by flash column chromatography on silica gel (PE/EtOAc = 10/1~5/1) afforded **3o** as a yellow solid (30.8 mg, 61%).  $R_f$  = 0.53 (PE/EtOAc = 5/1);  $^1\text{H NMR}$  (400 MHz,  $\text{CDCl}_3$ ):  $\delta$  8.46 (s, 2H), 7.95 (dd,  $J$  = 8.8, 1.6 Hz, 1H), 7.48 (d,  $J$  = 7.2 Hz, 2H), 7.41–7.38 (m, 3H), 7.36–7.32 (m, 1H), 7.25 (s, 1H), 6.64 (s, 1H), 5.40 (s, 2H);  $^{13}\text{C NMR}$  (100 MHz,  $\text{CDCl}_3$ ):  $\delta$  167.7, 138.6, 136.7, 128.7, 128.2, 127.6, 126.1, 125.7, 124.1, 123.7, 122.0, 110.9, 104.1, 66.5;

The spectral data are consistent with those reported in the literature.<sup>7</sup>

#### Benzyl 1-methyl-1H-indazole-5-carboxylate (**3p**)

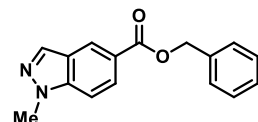

General procedure A was followed on 0.2 mmol scale with 36 h and purification by flash column chromatography on silica gel (PE/EtOAc = 5/1) afforded **3p** as a white solid (43.7 mg, 82%).  $R_f$  = 0.46 (PE/EtOAc = 5/1);  $^1\text{H NMR}$  (400 MHz,  $\text{CDCl}_3$ ):  $\delta$  8.55 (s, 1H), 8.10 (dd,  $J$  = 8.8, 1.2 Hz, 1H), 8.08 (s, 1H), 7.48 (d,  $J$  = 6.8 Hz, 2H), 7.43–7.36 (m, 4H), 5.40 (s, 2H), 4.10 (s, 3H);  $^{13}\text{C NMR}$  (100 MHz,  $\text{CDCl}_3$ ):  $\delta$  166.8, 141.7, 136.3, 134.7, 128.7, 128.4, 128.3, 127.3, 124.9, 123.8, 122.8, 108.8, 66.8, 35.8; **HRMS (ESI)**:  $[\text{M}+\text{H}]^+$  Calcd for  $\text{C}_{16}\text{H}_{15}\text{N}_2\text{O}_2^+$ : 267.1128; found: 267.1120.

#### Benzyl 9-phenyl-9H-carbazole-2-carboxylate (**3q**)

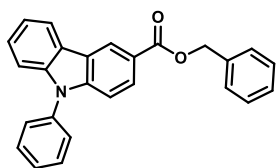

General procedure A was followed on 0.2 mmol scale with 36 h and purification by flash column chromatography on silica gel (PE/EtOAc = 30/1~20/1) afforded **3q** as a yellow gel-like oil (56.2mg, 75%).  $R_f$  = 0.50 (PE/EtOAc = 20/1);  $^1\text{H NMR}$  (400 MHz,  $\text{CDCl}_3$ ):  $\delta$  8.92 (d,  $J$  = 1.2 Hz, 1H), 8.20 (d,  $J$  = 7.6 Hz, 1H), 8.17 (dd,  $J$  = 8.4, 1.6 Hz, 1H), 7.65–7.62 (m, 2H), 7.67–7.45 (m, 5H), 7.48–7.33 (m, 7H), 5.46 (s, 2H);  $^{13}\text{C NMR}$  (100 MHz,  $\text{CDCl}_3$ ):  $\delta$  167.3, 143.7, 141.8, 137.1, 136.6, 130.2, 128.7, 128.3, 128.3, 128.2, 127.8, 127.3, 126.8, 123.4, 123.3, 123.1, 121.8, 121.0, 120.8, 110.3, 109.5, 66.7; **HRMS (ESI)**:  $[\text{M}+\text{Na}]^+$  Calcd for  $\text{C}_{26}\text{H}_{19}\text{NO}_2\text{Na}^+$ : 400.1308; found: 400.1313.

#### Benzyl quinoline-6-carboxylate (**3r**)

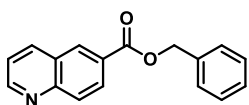

General procedure B was followed on 0.2 mmol scale with 22 h and purification by flash column chromatography on silica gel (PE/EtOAc = 5/1) afforded **3r** as a yellow oil (28.9 mg, 55%).  $R_f$  = 0.26 (PE/EtOAc = 5/1);  $^1\text{H NMR}$  (400 MHz,  $\text{CDCl}_3$ ):  $\delta$  9.00 (s, 1H), 8.62 (s, 1H), 8.34 (dd,  $J$  = 8.8, 1.6 Hz, 1H), 8.26 (d,  $J$  = 8.4 Hz, 1H), 8.15 (d,  $J$  = 8.4 Hz, 1H), 7.51–7.35 (m, 6H), 5.44 (s, 2H);  $^{13}\text{C NMR}$  (100 MHz,  $\text{CDCl}_3$ ):  $\delta$  166.1, 152.7, 150.2, 137.5, 135.9, 131.3, 130.4, 129.9, 129.1, 128.8, 128.6, 128.5, 128.2, 122.0, 67.3;

The spectral data are consistent with those reported in the literature.<sup>8</sup>

#### Benzyl 6-methoxynicotinate(3s)

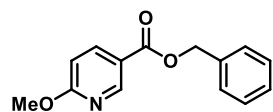

General procedure C was followed on 0.2 mmol scale with 36 h and purification by flash column chromatography on silica gel (PE/EtOAc = 30/1~20/1) afforded **3s** as a light-yellow solid (25.7 mg, 53%).  $R_f = 0.41$  (PE/EtOAc = 20/1);  $^1\text{H NMR}$  (400 MHz,  $\text{CDCl}_3$ ):  $\delta$  8.89 (d,  $J = 2.4$  Hz, 1H), 8.17 (dd,  $J = 8.8, 2.4$  Hz, 1H), 7.45–7.33 (m, 5H), 6.76 (d,  $J = 8.8$  Hz, 1H), 5.36 (s, 2H), 4.00 (s, 3H);  $^{13}\text{C NMR}$  (100 MHz,  $\text{CDCl}_3$ ):  $\delta$  167.0, 165.4, 150.4, 139.7, 136.0, 128.8, 128.5, 128.3, 119.7, 110.8, 66.7, 54.2; **HRMS (ESI)**:  $[\text{M}+\text{H}]^+$  Calcd for  $\text{C}_{14}\text{H}_{14}\text{NO}_3^+$ : 244.0968; found: 244.0968.

#### 4-(Tert-butyl) benzyl 4-methoxybenzoate (3t)

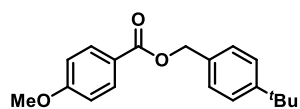

General procedure A was followed on 0.2 mmol scale with 22 h and purification by flash column chromatography on silica gel (PE/EtOAc = 20/1) afforded **3t** as a yellow oil (37.8 mg, 63%).  $R_f = 0.40$  (PE/EtOAc = 20/1);  $^1\text{H NMR}$  (400 MHz,  $\text{CDCl}_3$ ):  $\delta$  8.05–8.02 (m, 2H), 7.43–7.37 (m, 4H), 6.93–6.89 (m, 2H), 5.31 (s, 2H), 3.86 (s, 3H), 1.33 (s, 9H);  $^{13}\text{C NMR}$  (100 MHz,  $\text{CDCl}_3$ ):  $\delta$  166.4, 163.5, 151.3, 133.4, 131.9, 128.2, 125.6, 122.8, 113.7, 66.4, 55.6, 34.7, 31.5; **HRMS (ESI)**:  $[\text{M}+\text{Na}]^+$  Calcd for  $\text{C}_{19}\text{H}_{22}\text{O}_3\text{Na}^+$ : 321.1461; found: 321.1453.

#### [1,1'-Biphenyl]-4-ylmethyl 4-methoxybenzoate (3u)

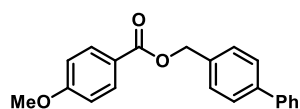

General procedure A was followed on 0.2 mmol scale with 22 h and purification by flash column chromatography on silica gel (PE/EtOAc = 20/1) afforded **3u** as a brown solid (46.6 mg, 73%).  $R_f = 0.38$  (PE/EtOAc = 20/1);  $^1\text{H NMR}$  (400 MHz,  $\text{CDCl}_3$ ):  $\delta$  8.07–8.04 (m, 2H), 7.62–7.59 (m, 4H), 7.52 (d,  $J = 8.4$  Hz, 2H), 7.45 (t,  $J = 7.6$  Hz, 2H), 7.38–7.34 (m, 1H), 6.94–6.91 (m, 2H), 5.38 (s, 2H), 3.86 (s, 3H);  $^{13}\text{C NMR}$  (100 MHz,  $\text{CDCl}_3$ ):  $\delta$  166.4, 163.6, 141.2, 140.8, 135.4, 131.9, 128.9, 128.7, 127.5, 127.4, 127.3, 122.6, 113.8, 66.3, 55.5.

The spectral data are consistent with those reported in the literature.<sup>9</sup>

#### 3,4-Dimethylbenzyl 4-methoxybenzoate (3v)

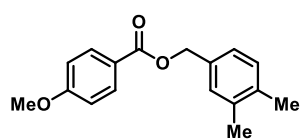

General procedure A was followed on 0.2 mmol scale with 22 h and purification by flash column chromatography on silica gel (PE/EtOAc = 20/1) afforded **3v** as a yellow oil (40.5 mg, 75%).  $R_f = 0.54$  (PE/EtOAc = 20/1);  $^1\text{H NMR}$  (400 MHz,  $\text{CDCl}_3$ ):  $\delta$  8.02 (d,  $J = 8.8$  Hz, 2H), 7.21 (s, 1H), 7.19 (d,  $J = 8.4$  Hz, 1H), 7.15 (d,  $J = 7.6$  Hz, 1H), 6.91 (d,  $J = 8.8$  Hz, 2H), 5.27 (s, 2H), 3.85 (s, 3H), 2.28 (s, 3H), 2.27 (s, 3H);  $^{13}\text{C NMR}$  (100 MHz,  $\text{CDCl}_3$ ):  $\delta$  166.4, 163.5, 136.9, 136.8, 133.8, 131.9, 129.9, 129.8, 126.0, 122.8, 113.7, 66.6, 55.6, 19.9, 19.7; **HRMS (ESI)**:  $[\text{M}+\text{Na}]^+$  Calcd for  $\text{C}_{17}\text{H}_{18}\text{O}_3\text{Na}^+$ : 293.1148; found: 293.1140.

#### Naphthalen-2-ylmethyl 4-methoxybenzoate (3w)

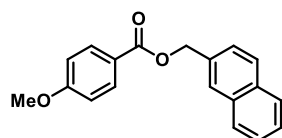

General procedure A was followed on 0.2 mmol scale with 22 h and purification by flash column chromatography on silica gel (PE/EtOAc = 20/1) afforded **3w** as a light-yellow solid (39.0 mg, 67%).  $R_f = 0.38$  (PE/EtOAc = 20/1);  $^1\text{H NMR}$  (400 MHz,  $\text{CDCl}_3$ ):  $\delta$  8.08–8.06 (m, 2H), 7.91 (s, 1H), 7.89–7.85 (m, 3H), 7.56 (dd,  $J = 8.4, 1.2$  Hz, 1H), 7.53–7.48 (m, 2H); 6.94–6.91 (m, 2H); 5.51 (s, 2H); 3.85 (s, 3H);  $^{13}\text{C NMR}$  (100 MHz,  $\text{CDCl}_3$ ):

$\delta$  166.4, 163.6, 133.9, 133.4, 133.2, 131.9, 128.5, 128.1, 127.9, 127.4, 126.4, 126.4, 126.0, 122.7, 113.8, 66.7, 55.6.

The spectral data are consistent with those reported in the literature.<sup>10</sup>

#### 4-Chlorobenzyl 4-methoxybenzoate (**3x**)

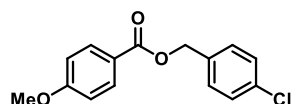

General procedure A was followed on 0.2 mmol scale with 22 h and purification by flash column chromatography on silica gel (PE/EtOAc = 30/1~20/1) afforded **3x** as a white solid (32.9 mg, 60%).  $R_f$  = 0.32 (PE/EtOAc = 20/1);  $^1\text{H NMR}$  (400 MHz,  $\text{CDCl}_3$ ):  $\delta$  8.04–8.00 (m, 2H), 7.39–7.34 (m, 4H), 6.94–6.90 (m, 2H), 5.30 (s, 2H), 3.86 (s, 3H);  $^{13}\text{C NMR}$  (100 MHz,  $\text{CDCl}_3$ ):  $\delta$  166.2, 163.7, 134.9, 134.1, 131.9, 129.6, 128.9, 122.4, 113.8, 65.7, 55.6;

The spectral data are consistent with those reported in the literature.<sup>11</sup>

#### Pyridin-2-ylmethyl 4-methoxybenzoate (**3y**)

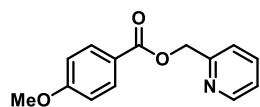

General procedure C was followed on 0.2 mmol scale with 22 h and purification by flash column chromatography on silica gel (PE/EtOAc = 10/1~5/1) afforded **3y** as a light-yellow solid (39.0 mg, 80%).  $R_f$  = 0.29 (PE/EtOAc = 5/1);  $^1\text{H NMR}$  (400 MHz,  $\text{CDCl}_3$ ):  $\delta$  8.61 (d,  $J$  = 4.4 Hz, 1H), 8.09–8.06 (m, 2H), 7.71 (td,  $J$  = 7.6, 1.6 Hz, 1H), 7.44 (d,  $J$  = 8.0 Hz, 1H), 7.24 (dd,  $J$  = 7.2, 2.0 Hz, 1H), 6.95–6.92 (m, 2H), 5.46 (s, 2H), 3.87 (s, 3H);  $^{13}\text{C NMR}$  (100 MHz,  $\text{CDCl}_3$ ):  $\delta$  166.1, 163.7, 156.4, 149.5, 136.9, 132.0, 122.9, 122.3, 121.8, 113.8, 67.0, 55.5;

The spectral data are consistent with those reported in the literature.<sup>12</sup>

#### (*R*)-1-Phenylethyl 4-methoxybenzoate (**3z**)

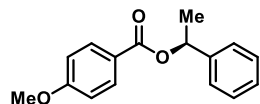

General procedure A was followed on 0.2 mmol scale with 22 h and purification by flash column chromatography on silica gel (PE/EtOAc = 20/1) afforded **3z** as a yellow oil (36.5 mg, 71%).  $R_f$  = 0.31 (PE/EtOAc = 20/1);  $^1\text{H NMR}$  (400 MHz,  $\text{CDCl}_3$ ):  $\delta$  8.06–8.02 (m, 2H), 7.45–7.43 (m, 2H), 7.39–7.35 (m, 2H), 7.31–7.27 (m, 1H), 6.94–6.90 (m, 2H), 6.11 (q,  $J$  = 6.4 Hz, 1H), 3.86 (s, 3H), 1.66 (d,  $J$  = 6.8 Hz, 3H);  $^{13}\text{C NMR}$  (100 MHz,  $\text{CDCl}_3$ ):  $\delta$  165.7, 163.5, 142.2, 131.8, 128.7, 127.9, 126.2, 123.1, 113.7, 72.7, 55.6, 22.6; **HRMS (ESI)**:  $[\text{M}+\text{Na}]^+$  Calcd for  $\text{C}_{16}\text{H}_{16}\text{O}_3\text{Na}^+$  : 279.0992; found: 279.0984.

#### 1-Phenylpropyl 4-methoxybenzoate (**3aa**)

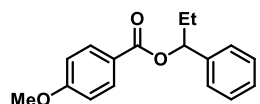

General procedure A was followed on 0.2 mmol scale with 22 h and purification by flash column chromatography on silica gel (PE/EtOAc = 50/1~30/1) afforded **3aa** as a yellow oil (26.0 mg, 48%).  $R_f$  = 0.68 (PE/EtOAc = 20/1);  $^1\text{H NMR}$  (400 MHz,  $\text{CDCl}_3$ ):  $\delta$  8.07–8.03 (m, 2H), 7.42–7.40 (m, 2H), 7.37–7.33 (m, 2H), 7.30–7.26 (m, 1H), 6.94–6.91 (m, 2H), 5.89 (t,  $J$  = 6.8 Hz, 1H), 3.86 (s, 3H), 2.11–2.01 (m, 1H), 1.99–1.89 (m, 1H), 0.96 (t,  $J$  = 6.8 Hz, 3H);  $^{13}\text{C NMR}$  (100 MHz,  $\text{CDCl}_3$ ):  $\delta$  165.8, 163.5, 141.0, 131.8, 128.5, 127.9, 126.6, 123.1, 113.7, 77.6, 55.6, 29.8, 10.1;

The spectral data are consistent with those reported in the literature.<sup>13</sup>

#### Methyl 4-methoxybenzoate (**3ab**)

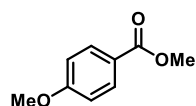

General procedure A was followed on 0.2 mmol scale with 36 h by using 20 equivalents of methanol as nucleophile and purification by flash column chromatography on silica gel (PE/EtOAc = 20/1) afforded **3ab** as a white solid (19.8 mg, 60%).  $R_f$  = 0.53 (PE/EtOAc = 20/1);  $^1\text{H NMR}$  (400 MHz,  $\text{CDCl}_3$ ):  $\delta$  8.00–7.98 (m, 2H), 6.94–6.90 (m, 2H), 3.89 (s, 3H), 3.86 (s, 3H);  $^{13}\text{C NMR}$  (100 MHz,  $\text{CDCl}_3$ ):  $\delta$  167.0, 163.5, 131.7, 122.7, 113.7, 55.5, 52.0;

The spectral data are consistent with those reported in the literature.<sup>9</sup>

#### Ethyl 4-methoxybenzoate (**3ac**)

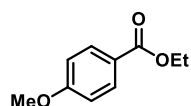

General procedure A was followed on 0.2 mmol scale with 36 h by using 20 equivalents of ethanol as nucleophile and purification by flash column chromatography on silica gel (PE/EtOAc = 20/1) afforded **3ac** as a colorless liquid (28.7 mg, 80%).  $R_f$  = 0.43 (PE/EtOAc = 20/1);  $^1\text{H NMR}$  (400 MHz,  $\text{CDCl}_3$ ):  $\delta$  8.01–7.98 (m, 2H), 6.93–6.89 (m, 2H), 4.34 (q,  $J$  = 7.2 Hz, 2H), 3.85 (s, 3H), 1.37 (t,  $J$  = 7.2 Hz, 3H);  $^{13}\text{C NMR}$  (100 MHz,  $\text{CDCl}_3$ ):  $\delta$  166.5, 163.4, 131.7, 123.1, 113.7, 60.8, 55.5, 14.5.

The spectral data are consistent with those reported in the literature.<sup>14</sup>

#### 4-Phenylbutyl 4-methoxybenzoate (**3ad**)

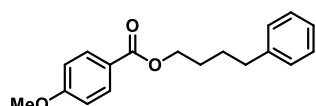

General procedure A was followed on 0.2 mmol scale with 22 h and purification by flash column chromatography on silica gel (PE/EtOAc = 30/1~20/1) afforded **3ad** as a light-yellow oil (32.6 mg, 57%).  $R_f$  = 0.35 (PE/EtOAc = 20/1);

$^1\text{H NMR}$  (400 MHz,  $\text{CDCl}_3$ ):  $\delta$  8.01–7.97 (m, 2H), 7.31–7.27 (m, 2H), 7.21–7.17 (m, 3H), 6.93–6.90 (m, 2H), 4.31 (t,  $J$  = 5.6 Hz, 2H), 3.86 (s, 3H), 2.69 (t,  $J$  = 2.8 Hz, 2H), 1.79 (quin,  $J$  = 3.2 Hz, 4H);  $^{13}\text{C NMR}$  (100 MHz,  $\text{CDCl}_3$ ):  $\delta$  166.6, 163.4, 142.2, 131.7, 128.5, 128.5, 126.0, 123.0, 113.7, 64.7, 55.5, 35.6, 28.5, 28.0. **HRMS (ESI)**:  $[\text{M}+\text{Na}]^+$  Calcd for  $\text{C}_{18}\text{H}_{20}\text{O}_3\text{Na}^+$ : 307.1305; found: 307.1296.

#### (Z)-Hex-3-en-1-yl 4-methoxybenzoate (**3ae**)

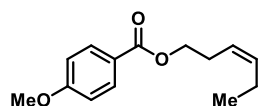

General procedure A was followed on 0.2 mmol scale with 22 h and purification by flash column chromatography on silica gel (PE/EtOAc = 20/1) afforded **3ae** as a light-yellow oil (30.7 mg, 66%).  $R_f$  = 0.53 (PE/EtOAc = 20/1);  $^1\text{H NMR}$  (400 MHz,  $\text{CDCl}_3$ ):  $\delta$  8.01–7.97 (m, 2H), 6.93–6.89 (m, 2H), 5.56–5.49 (m, 1H), 5.44–5.36 (m, 1H), 4.28 (t,  $J$  = 7.2 Hz, 2H), 3.85 (s, 3H), 2.50 (q,  $J$  = 6.8 Hz, 2H), 2.09 (quin,  $J$  = 7.2 Hz, 2H), 0.97 (t,  $J$  = 7.2 Hz, 3H);  $^{13}\text{C NMR}$  (100 MHz,  $\text{CDCl}_3$ ):  $\delta$  166.5, 163.4, 134.7, 131.7, 124.0, 122.9, 113.7, 64.3, 55.5, 27.0, 20.8, 14.4;

The spectral data are consistent with those reported in the literature.<sup>15</sup>

#### (Z)-Octadec-9-en-1-yl 4-methoxybenzoate (**3af**)

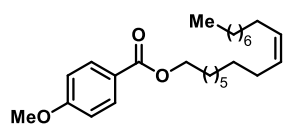

General procedure A was followed on 0.2 mmol scale with 36 h and purification by flash column chromatography on silica gel (PE/EtOAc = 100/1~50/1) afforded **3af** as a yellow oil (43.7 mg, 53%).  $R_f$  = 0.32 (PE/EtOAc = 50/1);  $^1\text{H NMR}$  (400 MHz,  $\text{CDCl}_3$ ):  $\delta$  8.01–7.98 (m, 2H), 6.93–6.90 (m, 2H), 5.36–5.33 (m, 2H), 4.28 (t,  $J$  = 6.4 Hz, 2H), 3.86 (s, 3H), 2.01 (q,  $J$  = 6.0 Hz, 2H), 1.75 (quin,  $J$  = 7.2 Hz, 2H), 1.47–1.26 (m, 24H), 0.88 (t,  $J$  = 7.2 Hz, 3H);  $^{13}\text{C NMR}$  (100 MHz,  $\text{CDCl}_3$ ):  $\delta$  166.6, 163.4, 131.7, 130.1, 130.0, 123.3, 123.1, 113.7, 65.0, 55.5, 32.0, 29.9, 29.9, 29.7, 29.6, 29.5, 29.4, 29.4, 28.9, 27.3, 27.3, 26.2, 22.8, 14.2. **HRMS (ESI)**:  $[\text{M}+\text{Na}]^+$  Calcd for  $\text{C}_{26}\text{H}_{42}\text{O}_3\text{Na}^+$ : 425.3026; found: 425.3029.



### 2-(2-Oxopyrrolidin-1-yl) ethyl 4-methoxybenzoate (3ag)

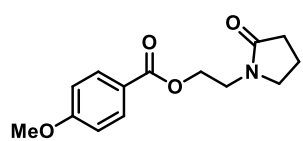

General procedure A was followed on 0.2 mmol scale with 36 h and purification by flash column chromatography on silica gel (PE/EtOAc = 1/1) afforded **3ag** as a yellow oil (34.8 mg, 66%).  $R_f$  = 0.23 (PE/EtOAc = 1/1);  $^1\text{H NMR}$  (400 MHz,  $\text{CDCl}_3$ ):  $\delta$  8.00–7.96 (m, 2H), 6.94–6.91 (m, 2H), 4.42 (t,  $J$  = 5.2 Hz, 2H), 3.86 (s, 3H), 3.68 (t,  $J$  = 5.2 Hz, 2H), 3.51 (t,  $J$  = 6.8 Hz, 2H), 2.39 (t,  $J$  = 8.0 Hz, 2H), 2.03 (quin,  $J$  = 7.6 Hz, 2H);  $^{13}\text{C NMR}$  (100 MHz,  $\text{CDCl}_3$ ):  $\delta$  175.5, 166.2, 163.6, 131.8, 122.3, 113.9, 62.3, 55.6, 48.1, 41.9, 30.9, 18.2; **HRMS (ESI)**:  $[\text{M}+\text{Na}]^+$  Calcd for  $\text{C}_{14}\text{H}_{17}\text{NO}_4\text{Na}^+$ : 286.1050; found: 286.1044.

### 2-(4-Isobutylphenyl) propyl 4-methoxybenzoate (3ah)

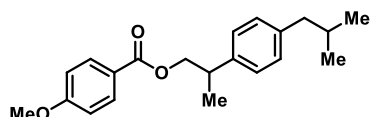

General procedure A was followed on 0.2 mmol scale with 22 h and purification by flash column chromatography on silica gel (PE/EtOAc = 20/1) afforded **3ah** as a light-yellow oil (37.5 mg, 58%).  $R_f$  = 0.54 (PE/EtOAc = 20/1);  $^1\text{H NMR}$  (400 MHz,  $\text{CDCl}_3$ ):  $\delta$  7.94 (d,  $J$  = 8.8 Hz, 2H), 7.19 (d,  $J$  = 8.0 Hz, 2H), 7.10 (d,  $J$  = 8.0 Hz, 2H), 6.90 (d,  $J$  = 9.2 Hz, 2H), 4.38 (dd,  $J$  = 10.8, 6.8 Hz, 1H), 4.32 (dd,  $J$  = 10.8, 6.8 Hz, 1H), 3.85 (s, 3H), 3.21 (sext,  $J$  = 7.6 Hz, 1H), 2.45 (d,  $J$  = 7.2 Hz, 2H), 1.90–1.80 (m, 1H), 1.38 (d,  $J$  = 6.8 Hz, 3H), 0.90 (d,  $J$  = 6.8 Hz, 6H);  $^{13}\text{C NMR}$  (100 MHz,  $\text{CDCl}_3$ ):  $\delta$  166.4, 163.4, 140.6, 140.1, 131.7, 129.3, 127.2, 122.9, 113.7, 69.9, 55.5, 45.2, 38.8, 30.3, 22.5, 22.5, 18.2. **HRMS (ESI)**:  $[\text{M}+\text{Na}]^+$  Calcd for  $\text{C}_{21}\text{H}_{26}\text{O}_3\text{Na}^+$ : 349.1774; found: 349.1768.

### (S)-2-(6-Methoxynaphthalen-2-yl) propyl 4-methoxybenzoate (3ai)

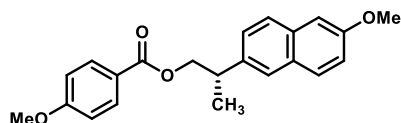

General procedure A was followed on 0.2 mmol scale with 36 h and purification by flash column chromatography on silica gel (PE/EtOAc = 20/1) afforded **3ai** as a white solid (47.1 mg, 67%).  $R_f$  = 0.27 (PE/EtOAc = 20/1);  $^1\text{H NMR}$  (400 MHz,  $\text{CDCl}_3$ ):  $\delta$  7.96–7.92 (m, 2H), 7.71 (dd,  $J$  = 8.4, 4.8 Hz, 2H), 7.66 (s, 1H), 7.40 (dd,  $J$  = 8.4, 1.2 Hz, 1H), 7.15–7.13 (m, 2H), 6.90–6.87 (m, 2H), 4.48 (dd,  $J$  = 10.8, 6.8 Hz, 1H), 4.42 (dd,  $J$  = 10.8, 6.8 Hz, 1H), 3.92 (s, 3H), 3.84 (s, 3H), 3.37 (sext,  $J$  = 7.2 Hz, 1H), 1.46 (d,  $J$  = 7.2 Hz, 3H);  $^{13}\text{C NMR}$  (100 MHz,  $\text{CDCl}_3$ ):  $\delta$  166.4, 163.4, 157.6, 138.6, 133.6, 131.7, 129.3, 129.2, 127.1, 126.6, 125.7, 122.9, 119.0, 113.7, 105.7, 69.8, 55.5, 55.4, 39.2, 18.3; **HRMS (ESI)**:  $[\text{M}+\text{Na}]^+$  Calcd for  $\text{C}_{22}\text{H}_{22}\text{O}_4\text{Na}^+$ : 373.1410; found: 373.1403.

### (S)-3,7-Dimethyloct-6-en-1-yl 4-methoxybenzoate (3aj)

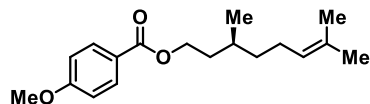

General procedure A was followed on 0.2 mmol scale with 36 h and purification by flash column chromatography on silica gel (PE/EtOAc = 20/1) afforded **3aj** as a yellow oil (39.5 mg, 68%).  $R_f$  = 0.47 (PE/EtOAc = 20/1);  $^1\text{H NMR}$  (400 MHz,  $\text{CDCl}_3$ ):  $\delta$  8.01–7.97 (m, 2H), 6.93–6.90 (m, 2H), 5.10 (tt,  $J$  = 6.8, 1.2 Hz, 1H), 4.37–4.28 (m, 2H), 3.86 (s, 3H), 2.08–1.93 (m, 2H), 1.84–1.76 (m, 1H), 1.67 (s, 3H), 1.66–1.62 (m, 1H), 1.60 (s, 3H), 1.59–1.52 (m, 1H), 1.44–1.36 (m, 1H), 1.28–1.18 (m, 1H), 0.96 (d,  $J$  = 6.8 Hz, 3H);  $^{13}\text{C NMR}$  (100 MHz,  $\text{CDCl}_3$ ):  $\delta$  166.6, 163.4, 131.7, 131.5, 124.7, 123.1, 113.7, 63.3, 55.5, 37.1, 35.7, 29.7, 25.8, 25.5, 19.6, 17.8. **HRMS (ESI)**:  $[\text{M}+\text{Na}]^+$  Calcd for  $\text{C}_{18}\text{H}_{26}\text{O}_3\text{Na}^+$ : 313.1774; found: 313.1767.

### Isopropyl 4-methoxybenzoate (3ak)

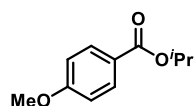

General procedure A was followed on 0.2 mmol scale with 36 h by using 20 equivalents of ethanol as nucleophile and purification by flash column chromatography on silica gel (PE/EtOAc = 20/1) afforded **3ak** as a colorless liquid (30.9 mg, 80%).  $R_f = 0.39$  (PE/EtOAc = 20/1);  $^1\text{H NMR}$  (400 MHz,  $\text{CDCl}_3$ ):  $\delta$  7.99 (d,  $J = 8.4$  Hz, 2H), 6.90 (d,  $J = 8.8$  Hz, 2H), 5.22 (sept,  $J = 6.4$  Hz, 1H), 3.85 (s, 3H), 1.35 (d,  $J = 6.4$  Hz, 6H);  $^{13}\text{C NMR}$  (100 MHz,  $\text{CDCl}_3$ ):  $\delta$  166.0, 163.3, 131.6, 123.5, 113.6, 68.1, 55.5, 22.1.

The spectral data are consistent with those reported in the literature.<sup>13</sup>

#### Cyclohexyl 4-methoxybenzoate (3al)

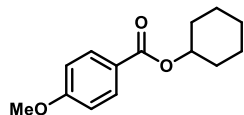

General procedure C was followed on 0.2 mmol scale and purification by flash column chromatography on silica gel (PE/EtOAc = 20/1) afforded **3al** as a yellow oil (19.3 mg, 41%).  $R_f = 0.59$  (PE/EtOAc = 20/1);  $^1\text{H NMR}$  (400 MHz,  $\text{CDCl}_3$ ):  $\delta$  8.02–7.98 (m, 2H), 6.63–6.89 (m, 2H), 5.03–4.96 (m, 1H), 3.86 (s, 3H), 1.95–1.91 (m, 2H), 1.81–1.77 (m, 2H), 1.62–1.53 (m, 4H), 1.49–1.25 (m, 2H);  $^{13}\text{C NMR}$  (100 MHz,  $\text{CDCl}_3$ ):  $\delta$  165.9, 163.3, 131.7, 123.6, 113.6, 72.8, 55.5, 31.8, 25.6, 23.8;

The spectral data are consistent with those reported in the literature.<sup>15</sup>

#### Cyclododecyl 4-methoxybenzoate (3am)

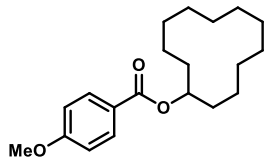

General procedure C was followed on 0.2 mmol scale and purification by flash column chromatography on silica gel (PE/EtOAc = 50/1~20/1) afforded **3am** as a yellow solid (33.3 mg, 52%).  $R_f = 0.77$  (PE/EtOAc = 20/1);  $^1\text{H NMR}$  (400 MHz,  $\text{CDCl}_3$ ): 8.01–7.97 (m, 2H), 6.92–6.89 (m, 2H), 5.26–5.20 (m, 1H), 3.85 (s, 3H), 1.86–1.77 (m, 2H), 1.67–1.59 (m, 2H), 1.45–1.33 (m, 18H);  $^{13}\text{C NMR}$  (100 MHz,  $\text{CDCl}_3$ ):  $\delta$  166.2, 163.3, 131.6, 123.5, 113.6, 72.6, 55.5, 29.2, 24.3, 24.3, 24.1, 23.5, 23.3, 21.0; **HRMS (ESI)**:  $[\text{M}+\text{Na}]^+$  Calcd for  $\text{C}_{20}\text{H}_{30}\text{O}_3^+\text{Na}$ : 341.2087; found: 341.2080.

#### 1-Benzylpyrrolidin-3-yl 4-methoxybenzoate (3an)

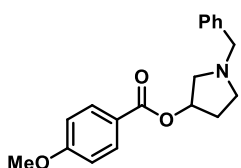

General procedure C was followed on 0.2 mmol scale with 36 h and purification by flash column chromatography on silica gel (PE/EtOAc = 5/1) afforded **3an** as a yellow oil (34.4 mg, 55%).  $R_f = 0.27$  (PE/EtOAc = 5/1);  $^1\text{H NMR}$  (400 MHz,  $\text{CDCl}_3$ ):  $\delta$  8.00–7.96 (m, 2H), 7.37–7.24 (m, 5H), 6.93–6.88 (m, 2H), 5.42–5.37 (m, 1H), 3.85 (s, 3H), 3.71 (dd,  $J = 28.8, 12.8$  Hz, 2H), 3.01 (dd,  $J = 11.2, 6.4$  Hz, 1H), 2.88–2.82 (m, 1H), 2.79 (dd,  $J = 11.2, 3.2$  Hz, 1H), 2.61 (q,  $J = 7.6$  Hz, 1H), 2.41–2.32 (m, 1H), 2.06–1.98 (m, 1H);  $^{13}\text{C NMR}$  (100 MHz,  $\text{CDCl}_3$ ):  $\delta$  166.3, 163.5, 138.1, 131.8, 129.1, 128.5, 127.4, 122.7, 113.7, 74.3, 60.3, 59.9, 55.5, 52.8, 32.1; **HRMS (ESI)**:  $[\text{M}+\text{H}]^+$  Calcd for  $\text{C}_{19}\text{H}_{22}\text{NO}_3^+$ : 312.1594; found: 312.1586.

#### (3S,8S,9S,10R,13R,14S,17R)-10,13-Dimethyl-17-((S)-6-methylheptan-2-yl)

2,3,4,7,8,9,10,11,12,13,14,15,16,17-tetradecahydro-1H-cyclopenta[a]phenanthren-3-yl methoxybenzoate (3ao)

4-

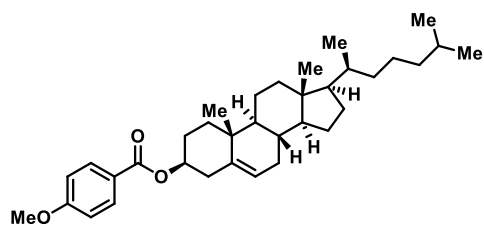

General procedure C was followed on 0.2 mmol scale and purification by flash column chromatography on silica gel (PE/EtOAc = 20/1) afforded **3ao** as a white solid (49.6 mg, 48%).  $R_f$  = 0.33 (PE/EtOAc = 20/1);  $^1\text{H NMR}$  (400 MHz,  $\text{CDCl}_3$ ):  $\delta$  8.00–7.98 (m, 2H), 6.92–6.89 (m, 2H), 5.41 (d,  $J$  = 4.0 Hz, 1H), 4.87–4.79 (m, 1H), 3.86 (s, 3H), 2.45 (d,  $J$  = 8.0 Hz, 2H), 2.04–1.67 (m, 6H), 1.55–1.09 (m, 16H), 1.06 (s, 3H), 1.04–0.95 (m, 4H), 0.92 (d,  $J$  = 6.4 Hz, 3H), 0.87 (dd,  $J$  = 6.4, 1.6 Hz, 6H), 0.69 (s, 3H);  $^{13}\text{C NMR}$  (100 MHz,  $\text{CDCl}_3$ ):  $\delta$  165.9, 163.3, 139.9, 131.7, 123.4, 122.8, 113.6, 74.4, 56.8, 56.3, 55.5, 50.2, 42.2, 39.9, 39.6, 38.4, 37.2, 36.8, 36.3, 35.9, 32.1, 32.0, 28.4, 28.1, 28.1, 24.4, 24.0, 23.0, 22.7, 21.2, 19.5, 18.9, 12.0. **HRMS (ESI)**:  $[\text{M}+\text{K}]^+$  Calcd for  $\text{C}_{35}\text{H}_{52}\text{O}_3\text{K}^+$ : 559.3548; found: 559.3543.

#### Phenyl 4-methoxybenzoate (**3ap**)

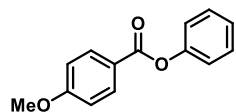

General procedure A was followed on 0.2 mmol scale and purification by flash column chromatography on silica gel (PE/EtOAc = 20/1) afforded **3ap** as a white solid (19.5 mg, 43%).  $R_f$  = 0.35 (PE/EtOAc = 20/1);  $^1\text{H NMR}$  (400 MHz,  $\text{CDCl}_3$ ):  $\delta$  8.17 (d,  $J$  = 8.8 Hz, 2H), 7.43 (t,  $J$  = 8.0 Hz, 2H), 7.26 (t,  $J$  = 7.6 Hz, 1H), 7.21 (d,  $J$  = 7.6 Hz, 2H), 6.99 (d,  $J$  = 8.8 Hz, 2H), 3.90 (s, 3H);  $^{13}\text{C NMR}$  (100 MHz,  $\text{CDCl}_3$ ):  $\delta$  165.1, 164.0, 151.2, 142.1, 132.4, 129.6, 125.9, 121.9, 114.0, 55.7;

The spectral data are consistent with those reported in the literature.<sup>9</sup>

#### 4-Methoxyphenyl 4-methoxybenzoate (**3aq**)

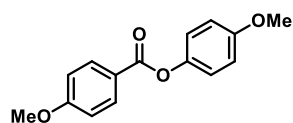

General procedure A was followed on 0.2 mmol scale and purification by flash column chromatography on silica gel (PE/EtOAc = 20/1) afforded **3aq** as light-yellow solid (24.1 mg, 47%).  $R_f$  = 0.23 (PE/EtOAc = 20/1);  $^1\text{H NMR}$  (400 MHz,  $\text{CDCl}_3$ ):  $\delta$  8.16–8.13 (m, 2H), 7.14–7.10 (m, 2H), 7.00–6.98 (d,  $J$  = 9.2 Hz, 2H), 6.95–6.91 (m, 2H), 3.90 (s, 3H), 3.82 (s, 3H);  $^{13}\text{C NMR}$  (100 MHz,  $\text{CDCl}_3$ ):  $\delta$  165.4, 164.0, 157.4, 144.7, 132.4, 122.7, 122.1, 114.6, 113.9, 55.8, 55.7;

The spectral data are consistent with those reported in the literature.<sup>16</sup>

## Procedure for Synthesis of the 3a on a 1.0 mmol-scale

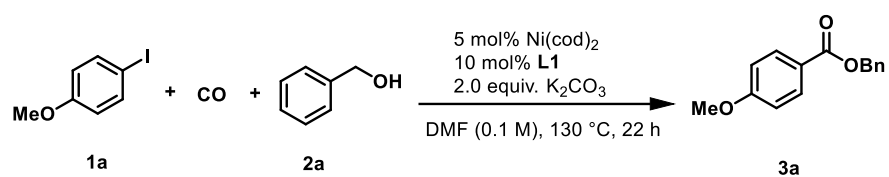

To an oven-dried 25 mL Schlenk tube, 4-iodoanisole (1.0 equiv. 1.0 mmol, 234.0 mg), K<sub>2</sub>CO<sub>3</sub> (2.0 equiv. 2.0 mmol, 276.4 mg), L1 (10 mol%, 0.1 mmol, 18.0 mg) were added. Then the tube was transferred into glovebox and Ni(cod)<sub>2</sub> (5 mol%, 0.05 mmol, 13.8 mg) was added. The tube was evacuated and equipped with a CO balloon. DMF (10 mL) and benzyl alcohol (1.5 equiv. 1.5 mmol, 155 μL) were added in sequence and the mixture was stirred at 130 °C for 22 h. Then the reaction was quenched with saturated aqueous solution of NH<sub>4</sub>Cl. The mixture was extracted with ethyl acetate for 3 times, and washed with water for 3 times. The combined organic layer was dried over Na<sub>2</sub>SO<sub>4</sub>, filtered and then concentrated under reduced pressure. The crude product was purified by flash column chromatography (SiO<sub>2</sub>, PE/EA = 30/1~20/1) to yield the product **3a** (159.8 mg, 66%) as light-yellow oil.

## **References**

1. B. Lu, F. Zhu, H.-M. Sun and Q. Shen, *Org. Lett.*, 2017, **19**, 1132.
2. H. Liu, G. Shi, S. Pan, Y. Jiang, Y. and Zhang, *Org. Lett.*, 2013, **15**, 4098.
3. A. K. Chakraborti and S. V. Chankeshwara, *J. Org. Chem.*, 2009, **74**, 1367.
4. W. Yao, J. Yang and F. Hao, *ChemSusChem.*, 2020, **13**, 121.
5. M. Lai, X. Qi, X.-F. Wu, *Eur. J. Org. Chem.*, 2019, **23**, 3776.
6. S. K. Rout, S. Guin, K. K. Ghara, A. Banerjee; B. K. Patel, *Org. Lett.*, 2012, **14**, 3982.
7. R. T. Jacobs, F. J. Brown, L. A. Cronk, D. Aharony, C. K. Buckner, E. J. Kusner, K. M. Kirkland and K. L. Neilson, *J. Med. Chem.*, 1993, **36**, 394.
8. M. Couturier and T. Le, *Org. Process Res. Dev.* 2006, **10**, 534.
9. P. Van Bonn, C. Bolm and J. G. Hernández, *Chem. Eur. J.*, 2020, **26**, 2576.
10. A. G. M. Barrett, R. S. Roberts, J. Schröder, *Org. Lett.*, 2000, **2**, 2999.
11. M. März, M. Babor, R. Cibulka, *Eur. J. Org. Chem.*, 2019, 3264.
12. L. Wang, H. Neumann, A. Spannenberg, M. Beller, *Chem. Commun.*, 2017, **53**, 7469.
13. S. D. Bull, S. G. Davies, C. Garner, D. Kruchinin, M.-S. Key, P. M. Roberts, E. D. Savory, A. D. Smitha, J. E. Thomsona, *Org. Biomol. Chem.*, 2006, **4**, 2945.
14. Z. Chen, Y. Wen, Y. Hu, H. Chen, M. Ye, G. Luo, *Synlett*, 2017, **28**, 981.
15. Y. B. Branchu, C. Gosmini, G. Danoun, *Chem. Eur. J.*, 2017, **23**, 10043.
16. H. Li, H. Neumann, M. Beller, X.-F. Wu, *Angew. Chem., Int. Ed.*, 2014, **53**, 3183.

# NMR Spectrum

## <sup>1</sup>H NMR-spectrum (400 MHz, CDCl<sub>3</sub>) of 3a

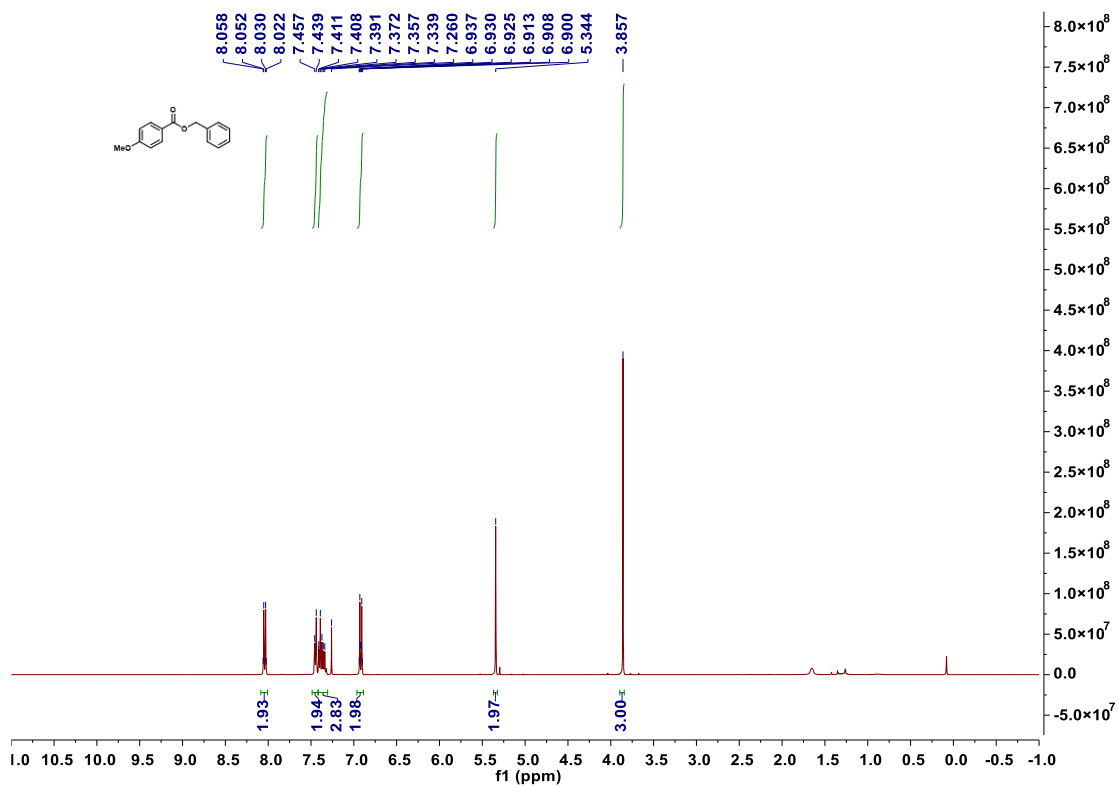

## <sup>13</sup>C NMR-spectrum (100 MHz, CDCl<sub>3</sub>) of 3a

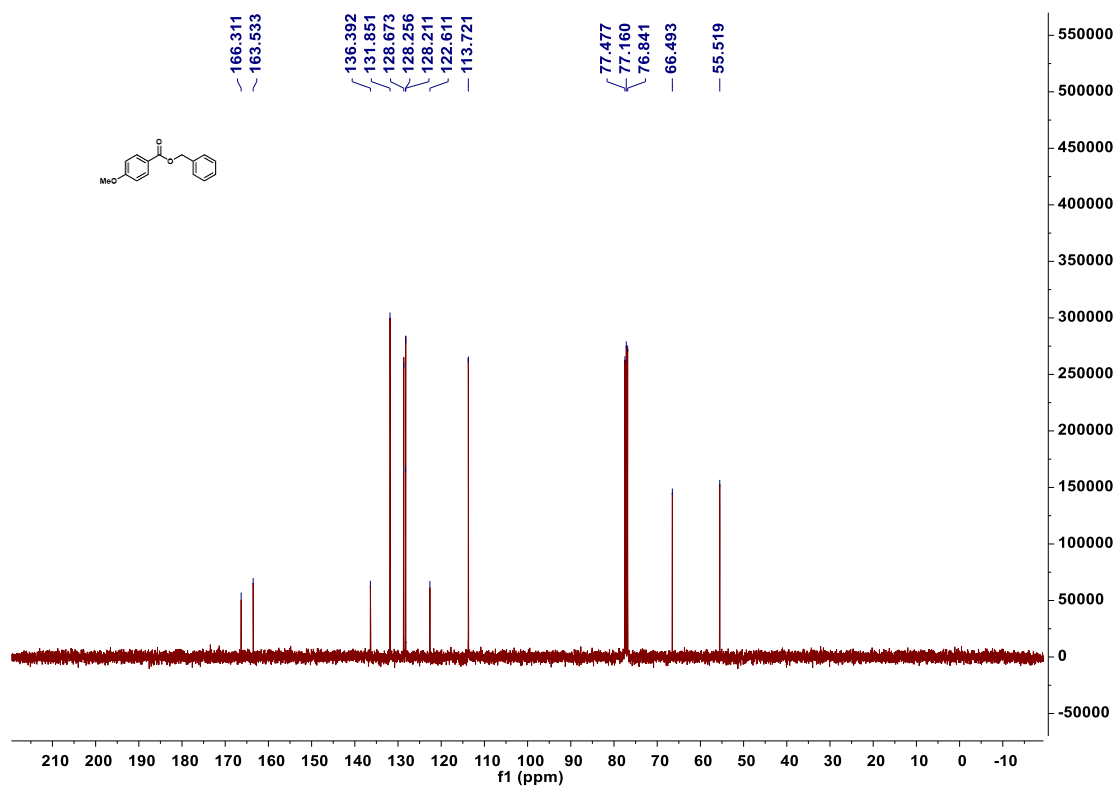

<sup>1</sup>H NMR-spectrum (400 MHz, CDCl<sub>3</sub>) of **3b**

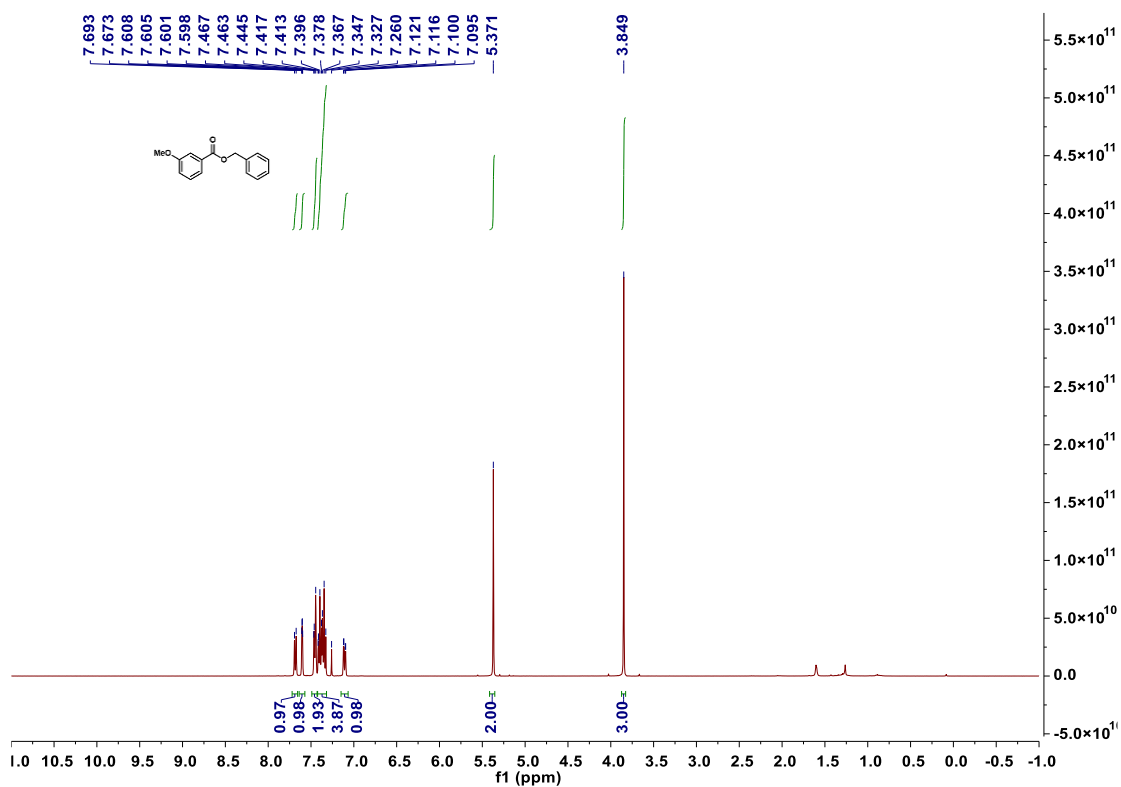

<sup>13</sup>C NMR-spectrum (100 MHz, CDCl<sub>3</sub>) of **3b**

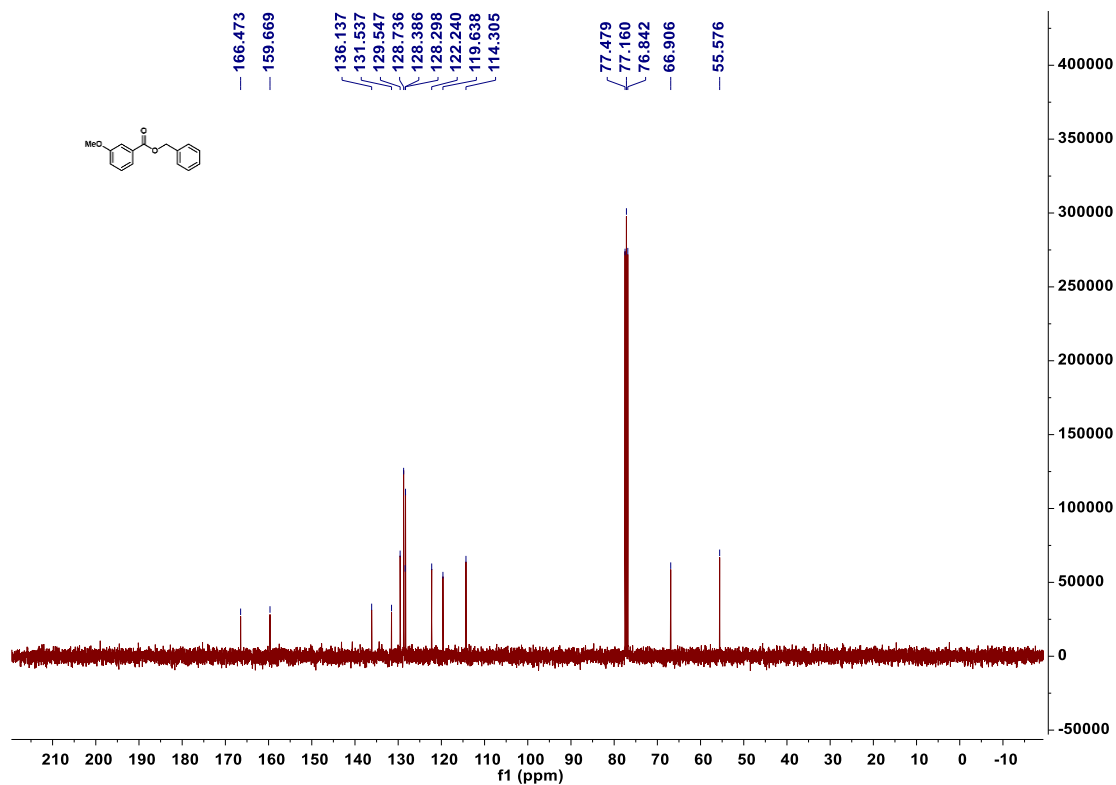

<sup>1</sup>H NMR-spectrum (400 MHz, CDCl<sub>3</sub>) of **3c**

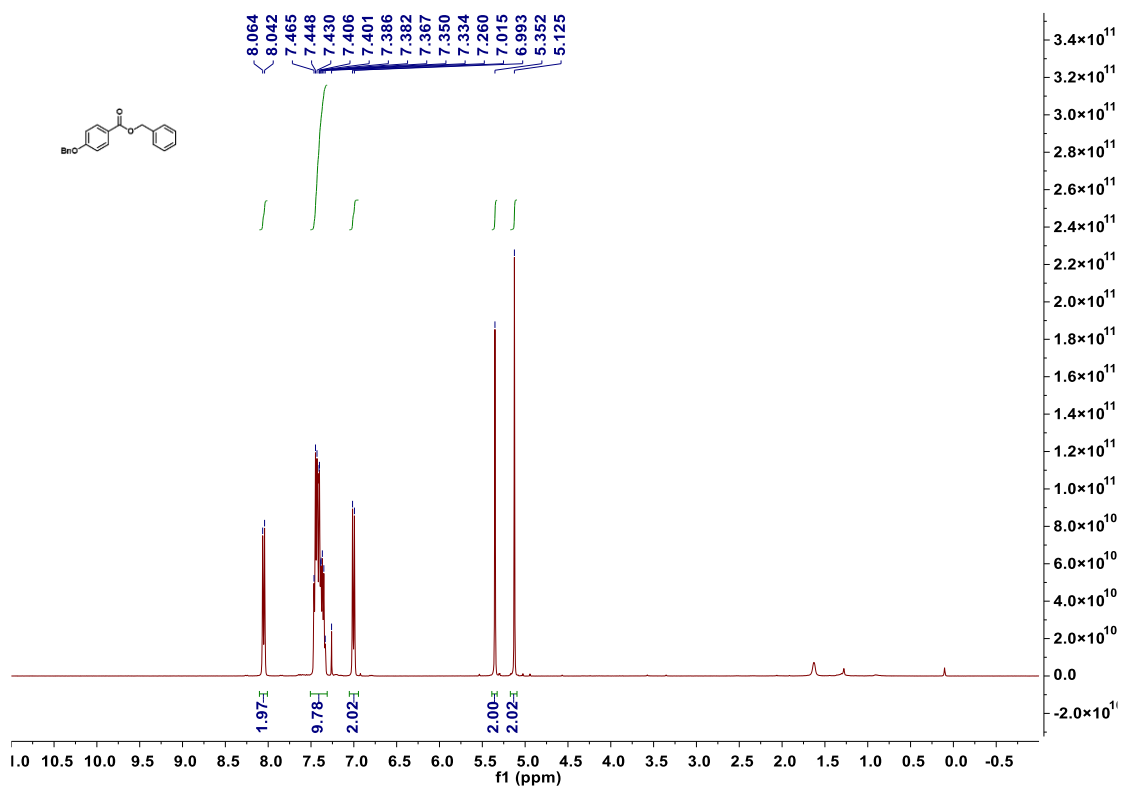

<sup>13</sup>C NMR-spectrum (100 MHz, CDCl<sub>3</sub>) of **3c**

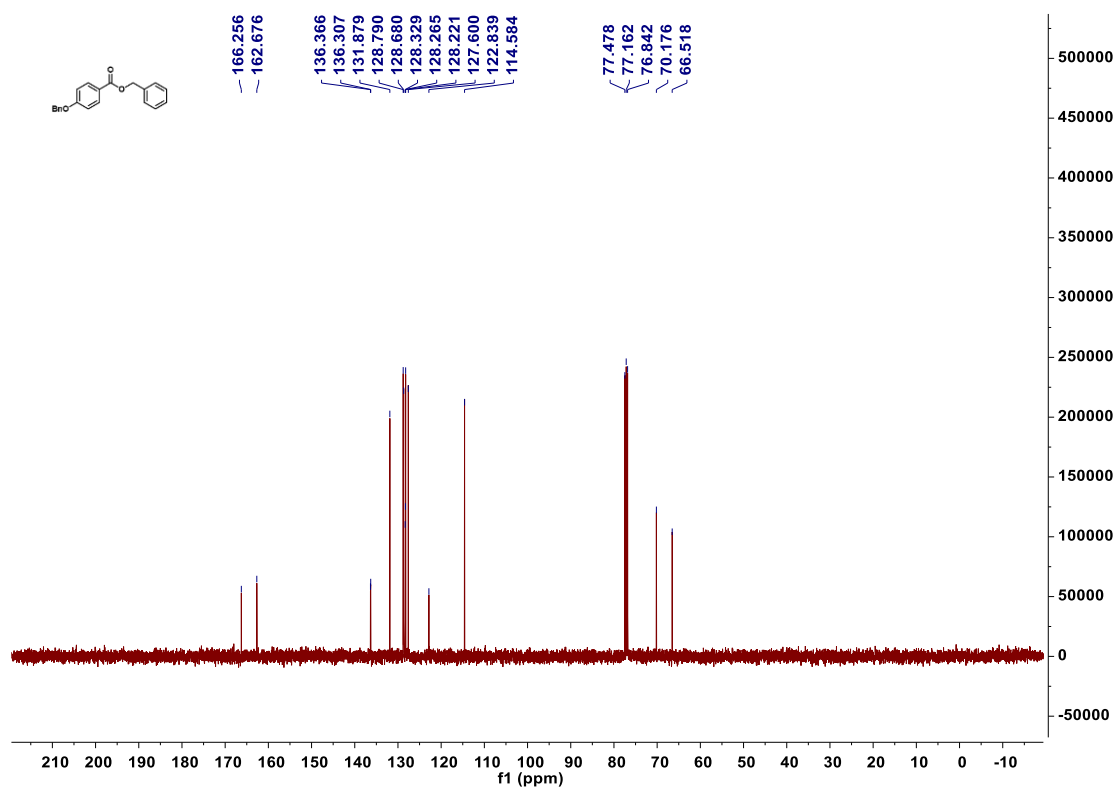



<sup>1</sup>H NMR-spectrum (400 MHz, CDCl<sub>3</sub>) of **3d**

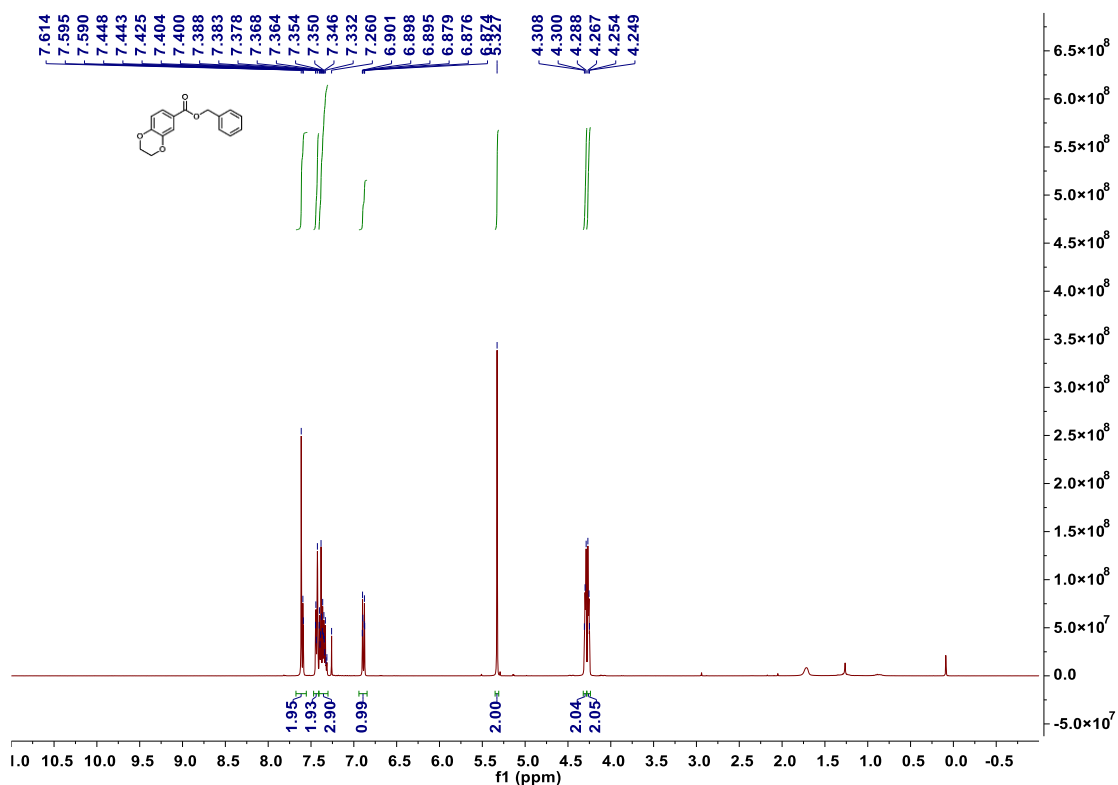

<sup>13</sup>C NMR-spectrum (100 MHz, CDCl<sub>3</sub>) of **3d**

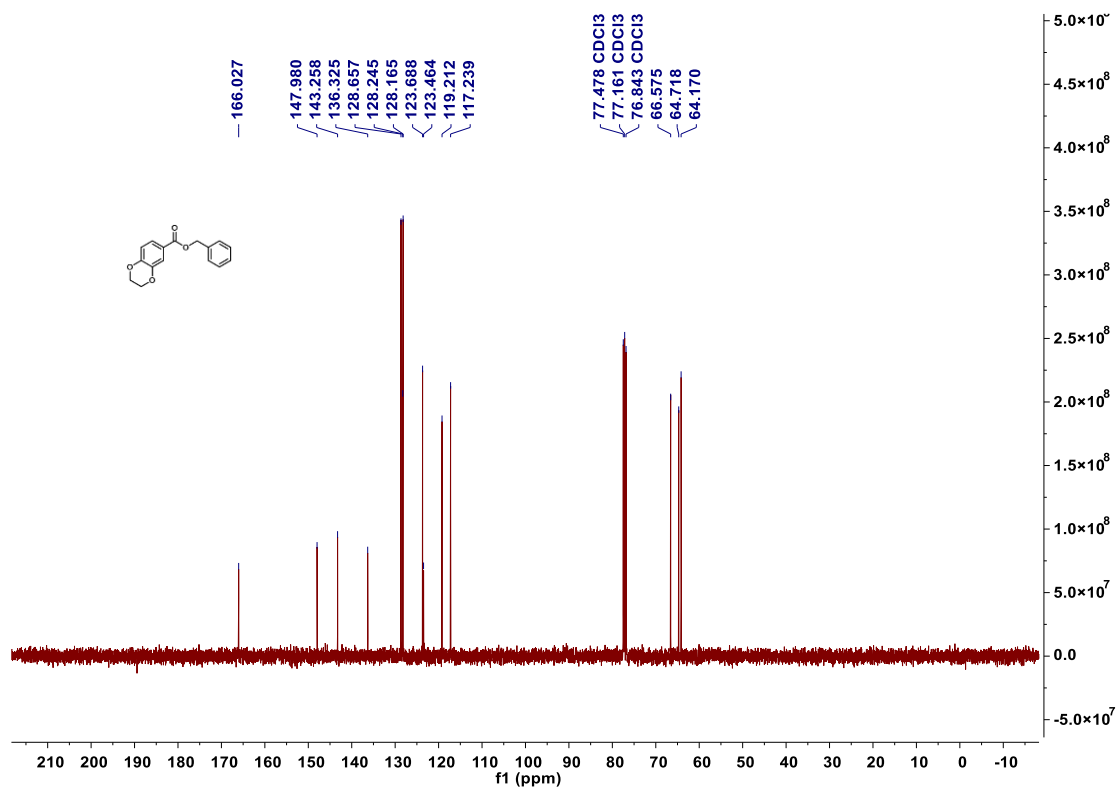

<sup>1</sup>H NMR-spectrum (400 MHz, CDCl<sub>3</sub>) of 3e

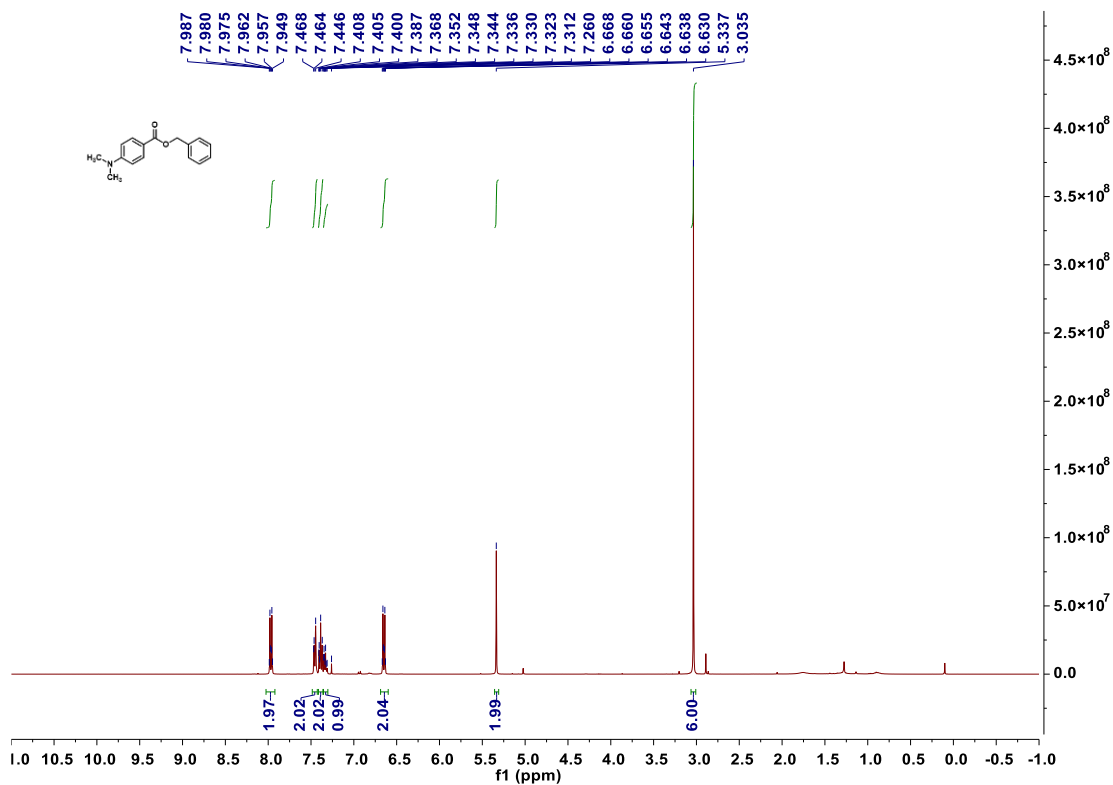

<sup>13</sup>C NMR-spectrum (100 MHz, CDCl<sub>3</sub>) of 3e

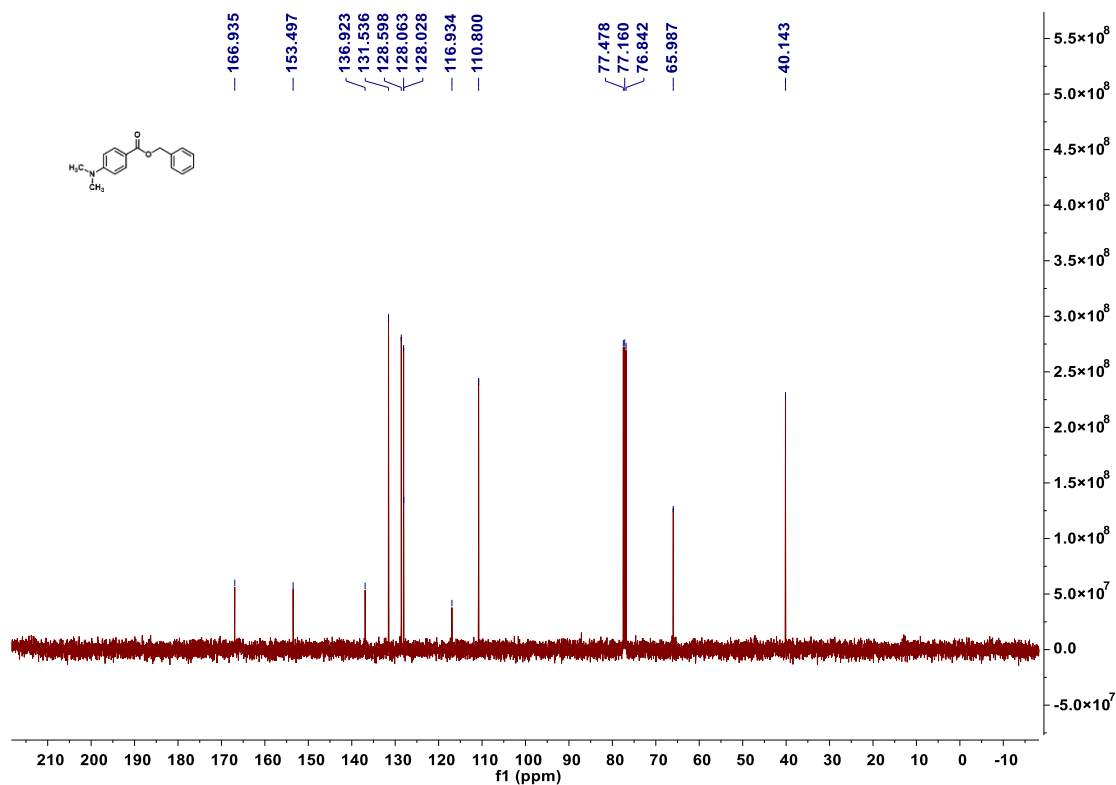

<sup>1</sup>H NMR-spectrum (400 MHz, CDCl<sub>3</sub>) of **3f**

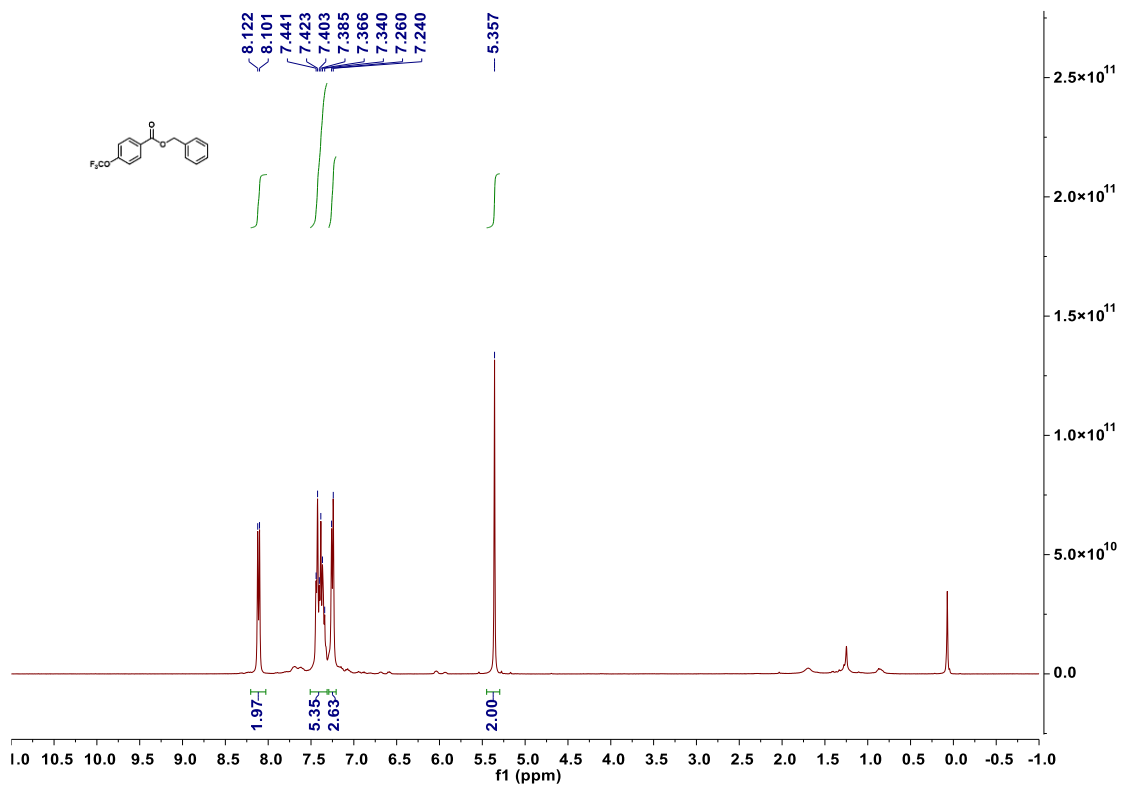

<sup>13</sup>C NMR-spectrum (100 MHz, CDCl<sub>3</sub>) of **3f**

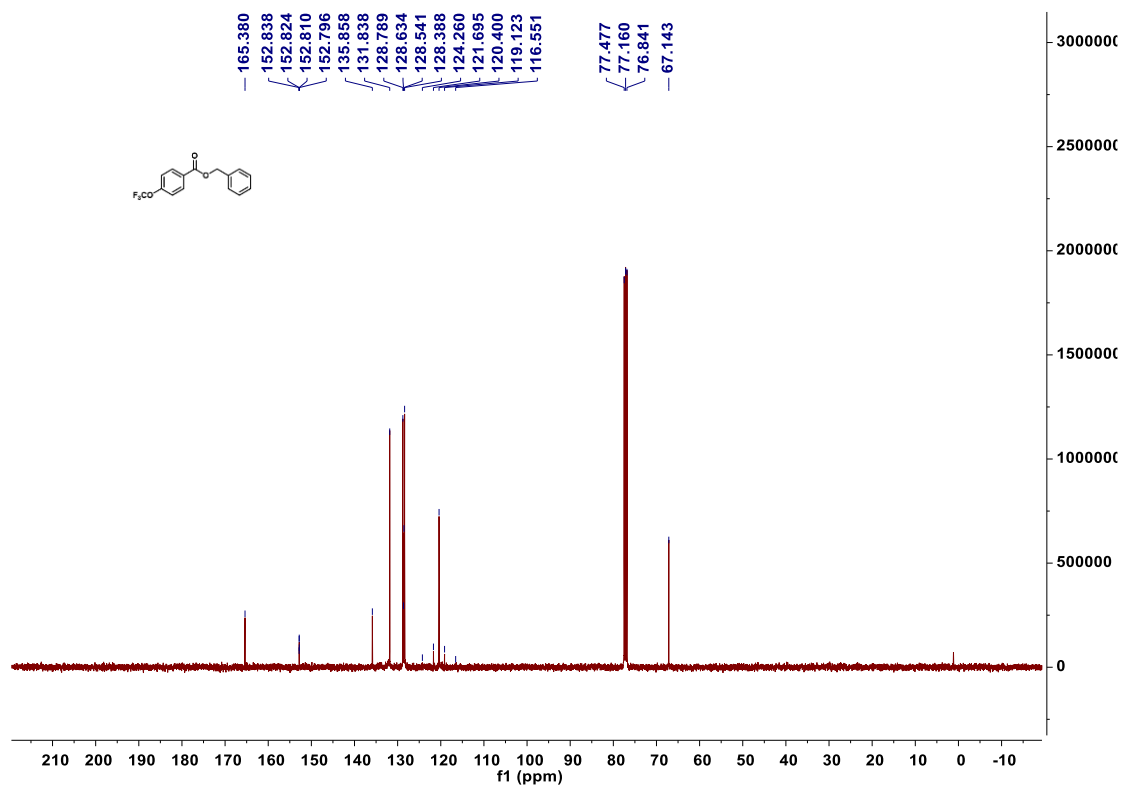

<sup>19</sup>F NMR-spectrum (376 MHz, CDCl<sub>3</sub>) of **3f**

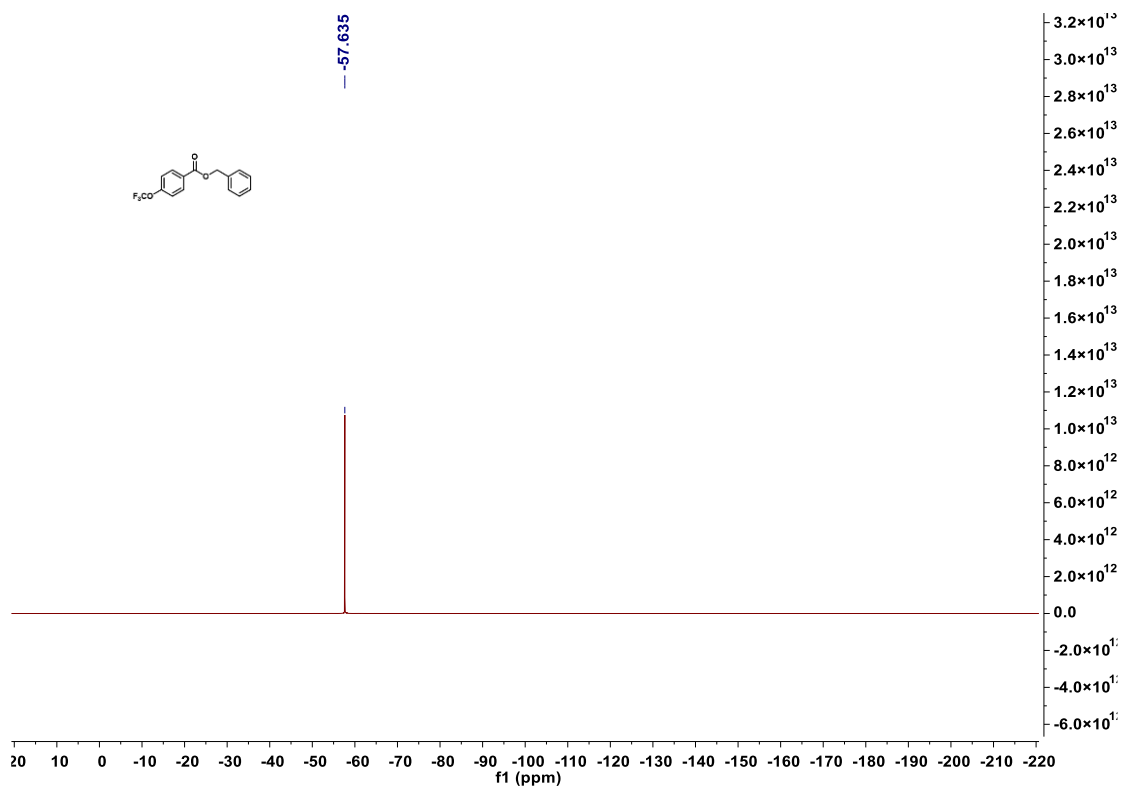

<sup>1</sup>H NMR-spectrum (400 MHz, CDCl<sub>3</sub>) of **3g**

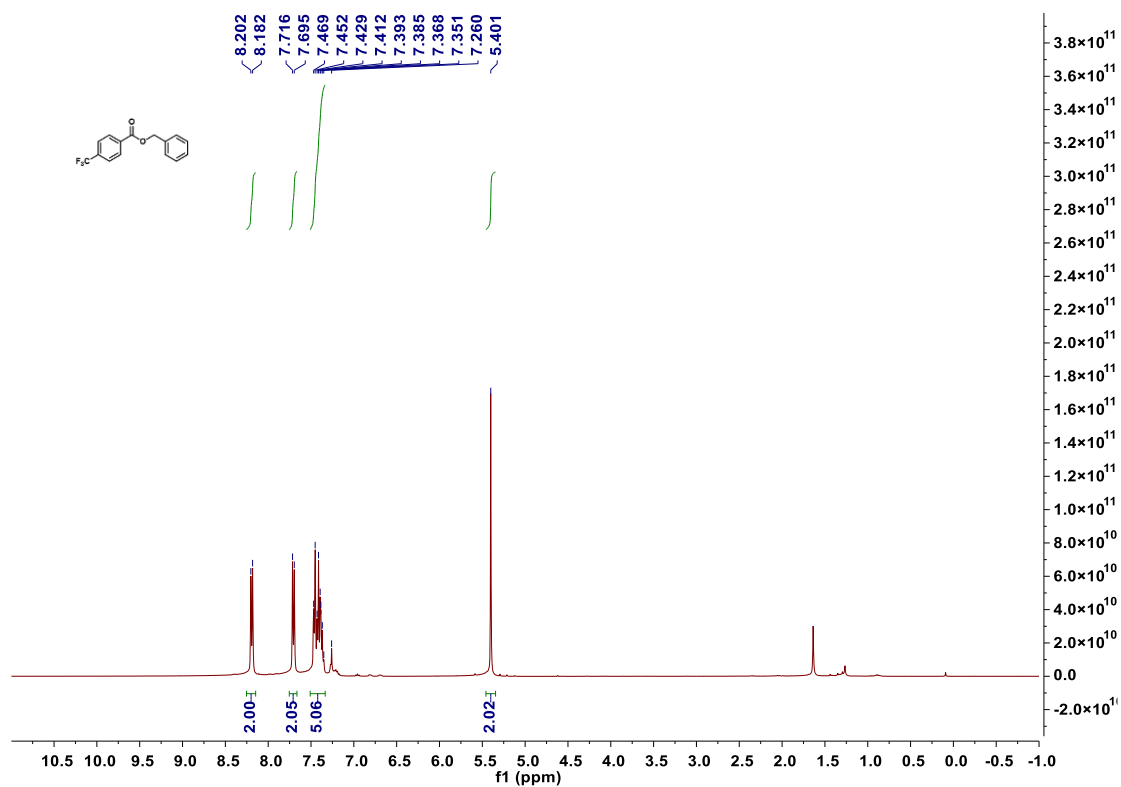

<sup>13</sup>C NMR-spectrum (100 MHz, CDCl<sub>3</sub>) of **3g**

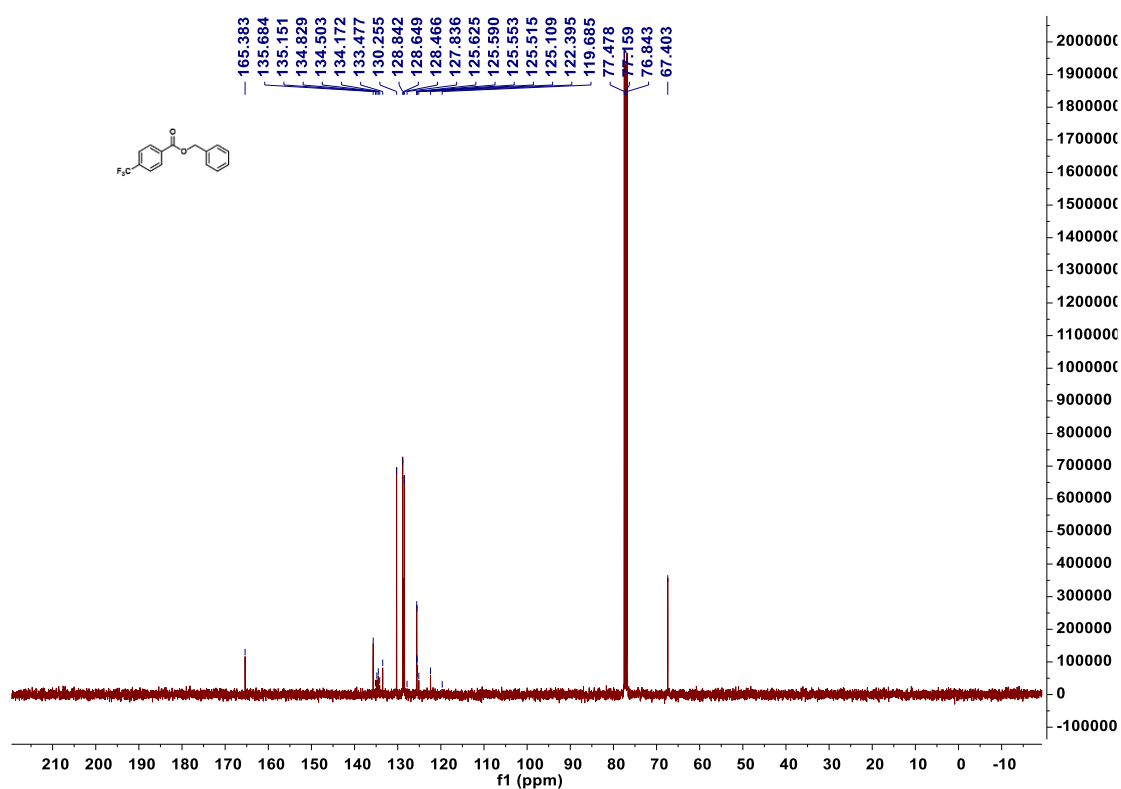

<sup>19</sup>F NMR-spectrum (376 MHz, CDCl<sub>3</sub>) of 3g

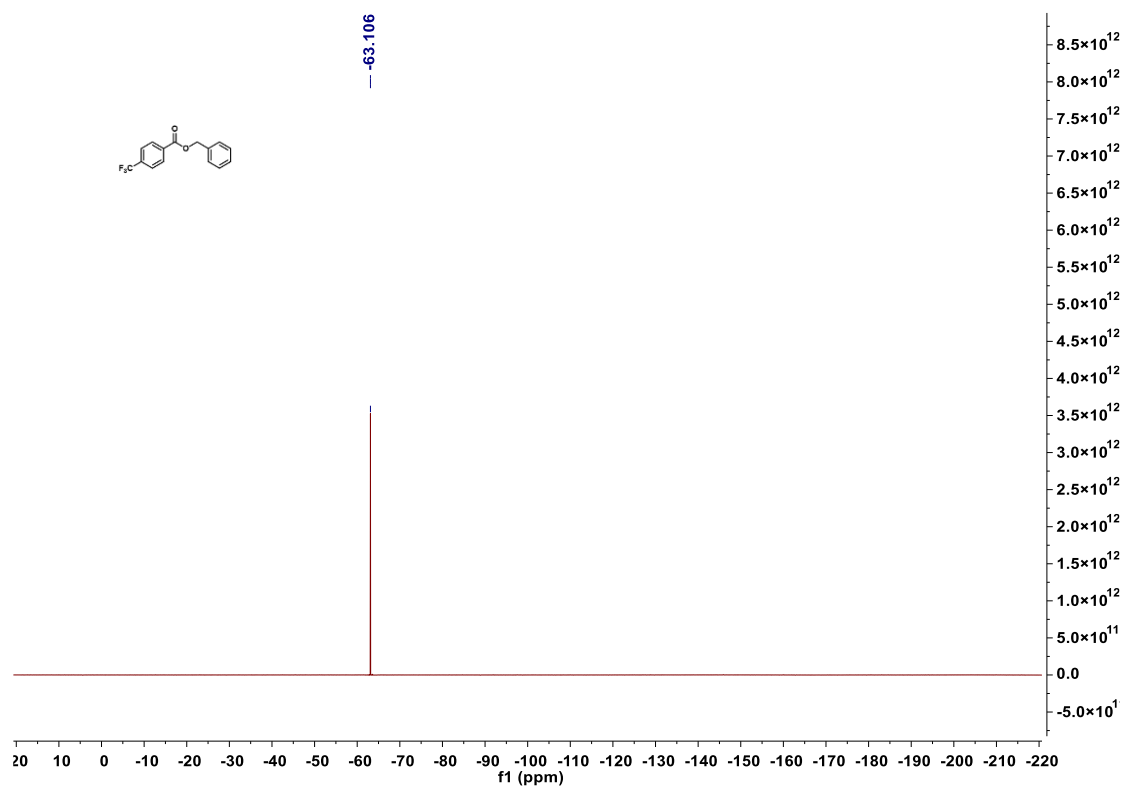

<sup>1</sup>H NMR-spectrum (400 MHz, CDCl<sub>3</sub>) of **3h**

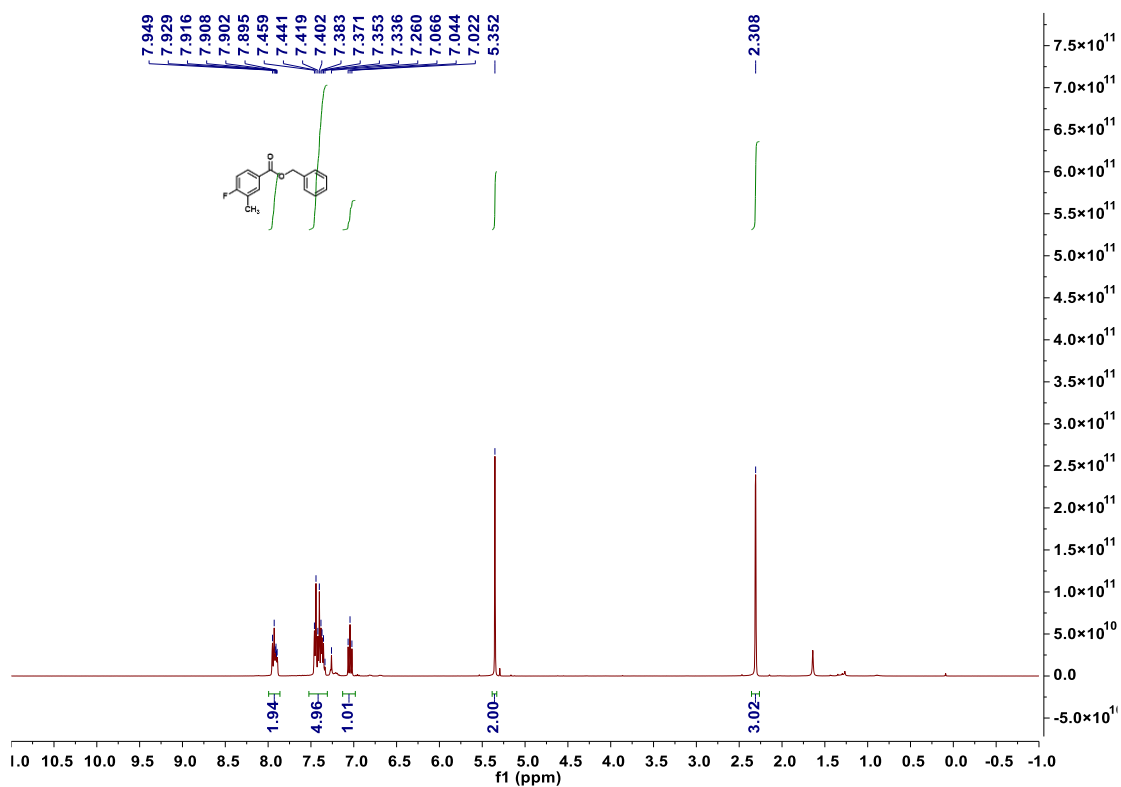

<sup>13</sup>C NMR-spectrum (100 MHz, CDCl<sub>3</sub>) of **3h**

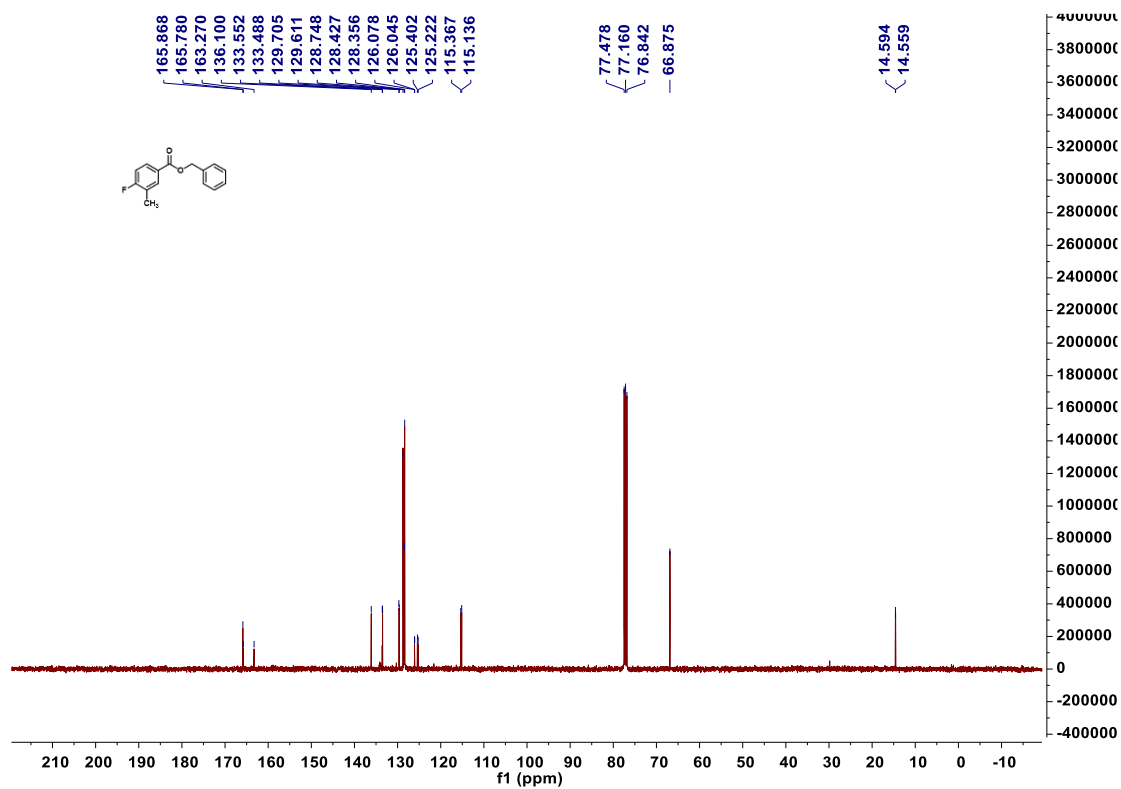

<sup>19</sup>F NMR-spectrum (376 MHz, CDCl<sub>3</sub>) of **3h**

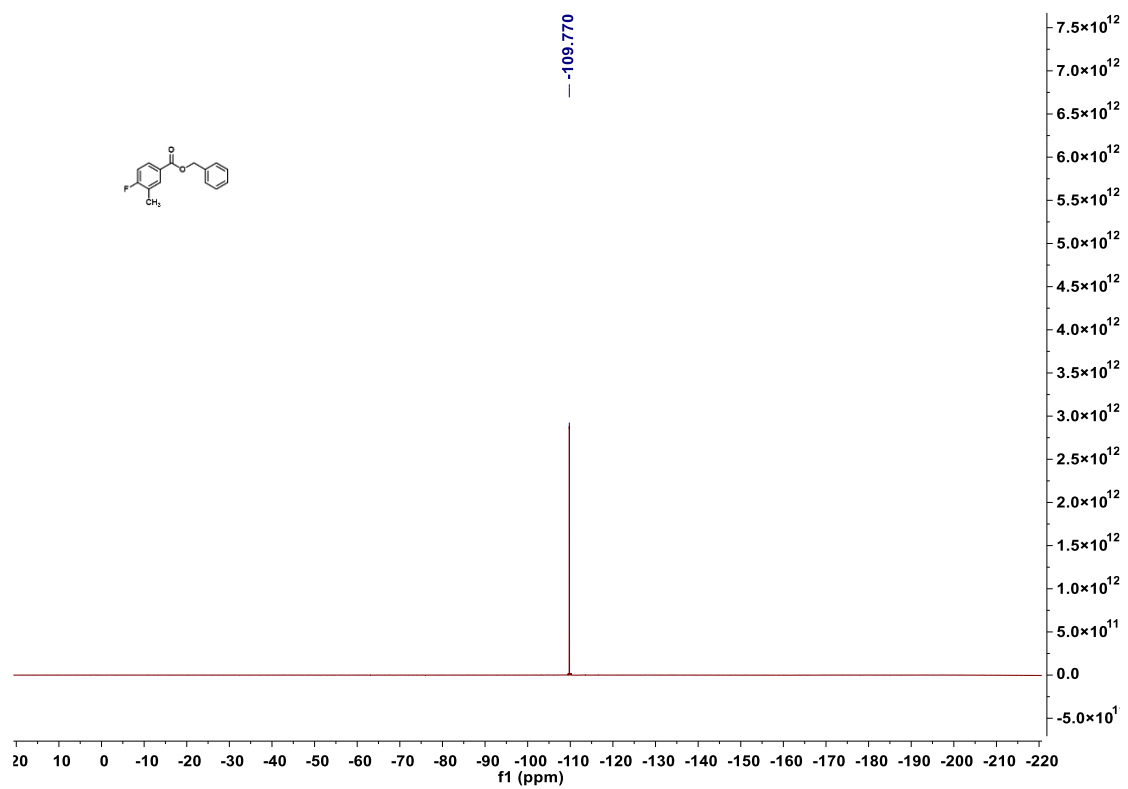



<sup>1</sup>H NMR-spectrum (400 MHz, CDCl<sub>3</sub>) of **3i**

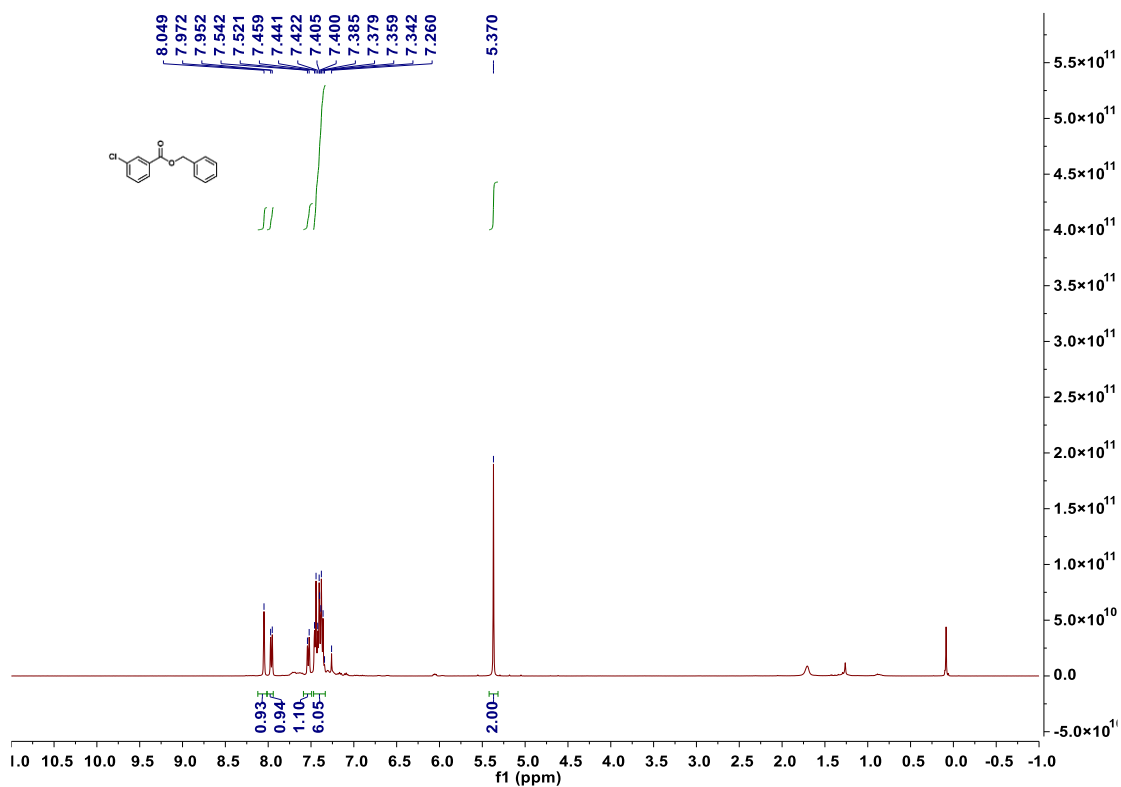

<sup>13</sup>C NMR-spectrum (100 MHz, CDCl<sub>3</sub>) of **3i**

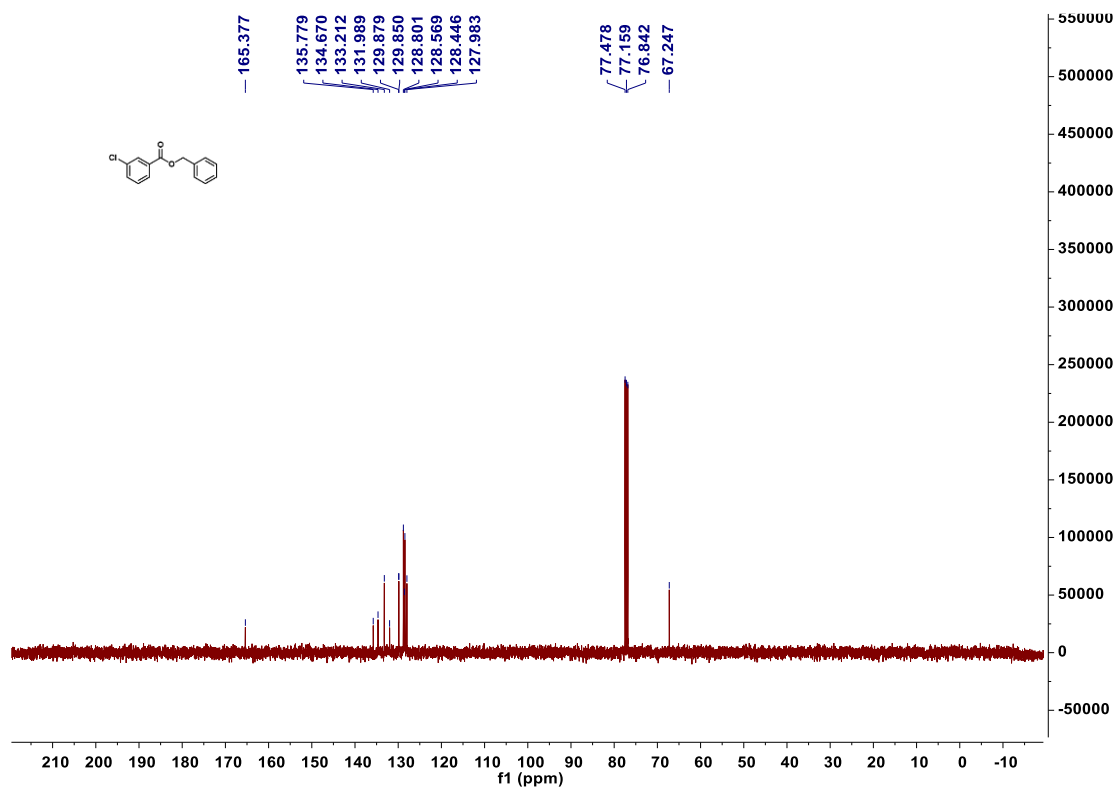

<sup>1</sup>H NMR-spectrum (400 MHz, CDCl<sub>3</sub>) of **3j**

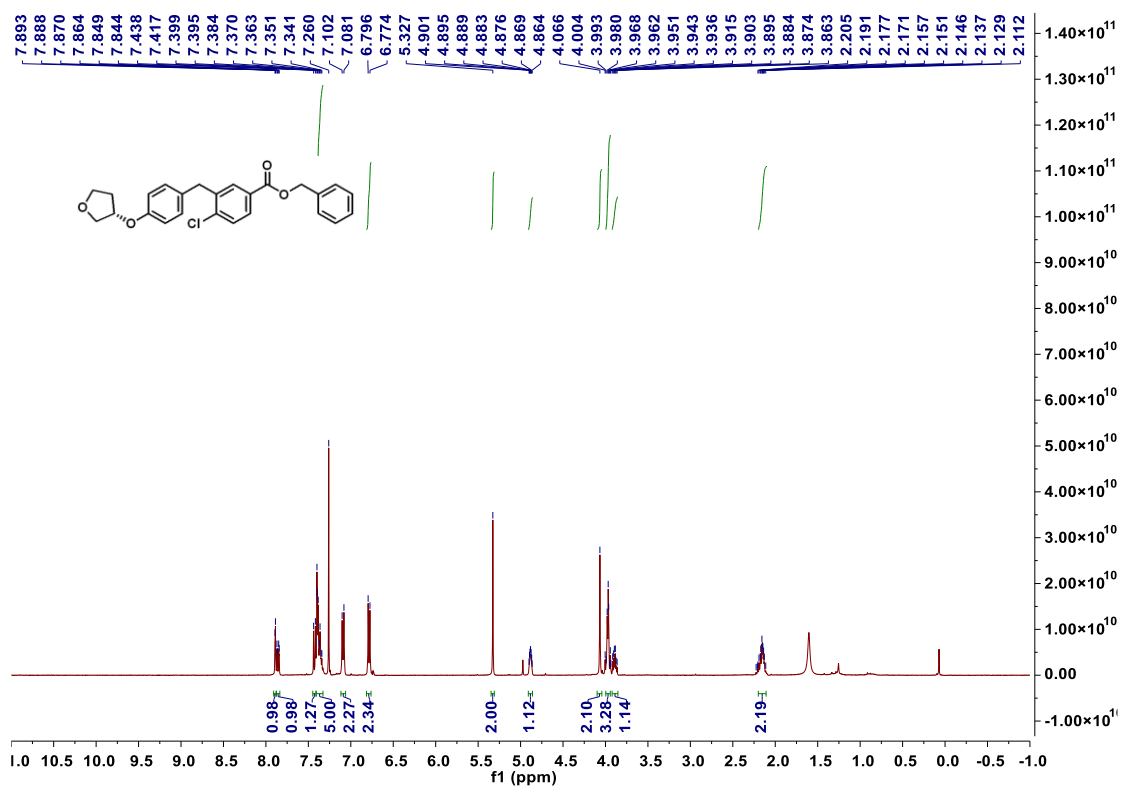

<sup>13</sup>C NMR-spectrum (100 MHz, CDCl<sub>3</sub>) of **3j**

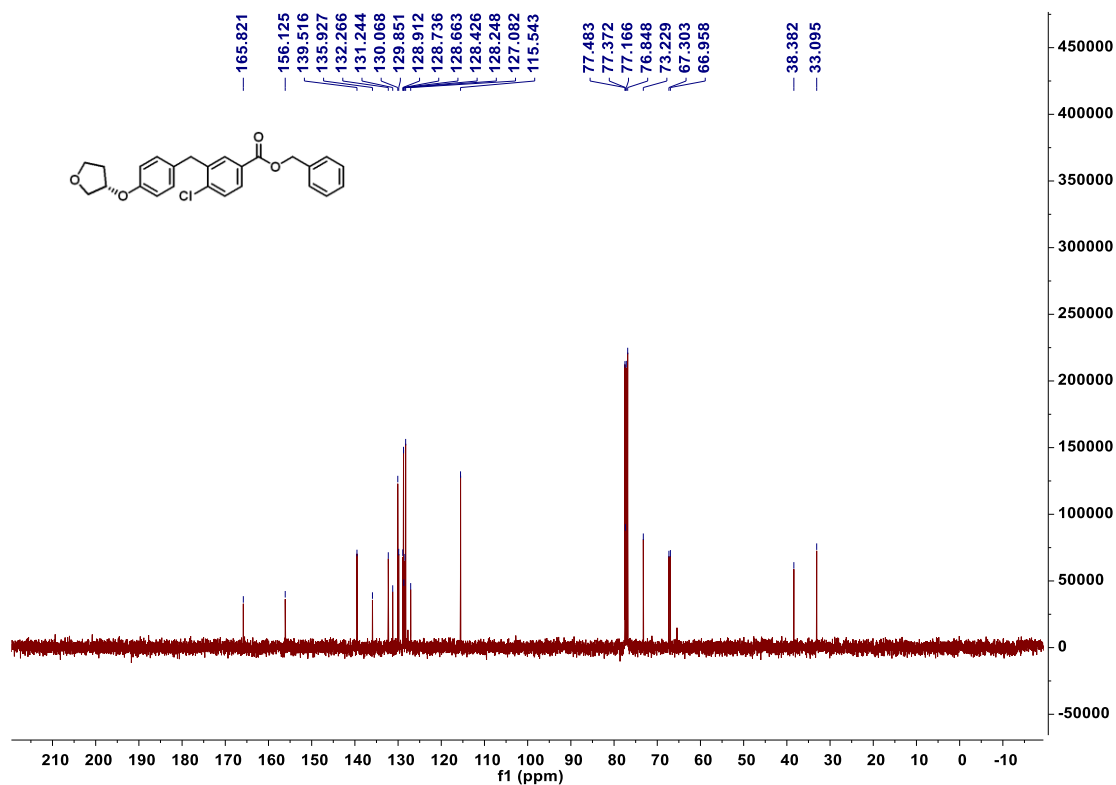

<sup>1</sup>H NMR-spectrum (400 MHz, CDCl<sub>3</sub>) of **3k**

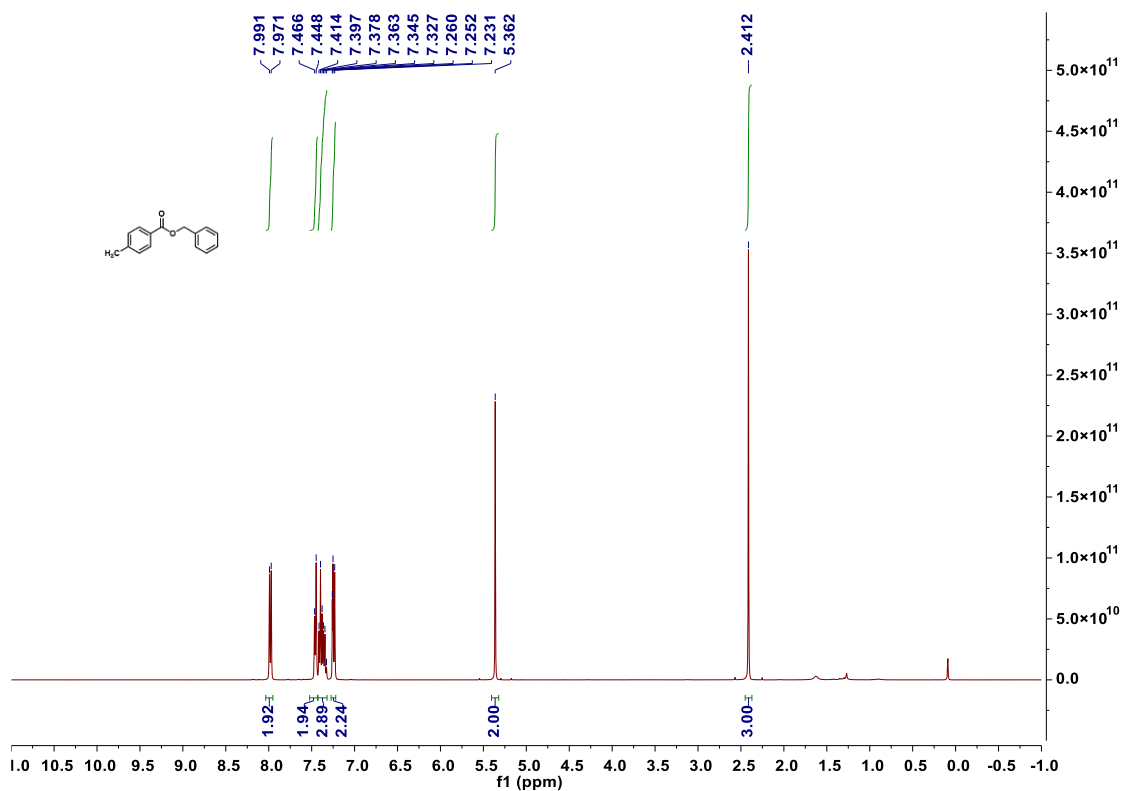

<sup>13</sup>C NMR-spectrum (100 MHz, CDCl<sub>3</sub>) of **3k**

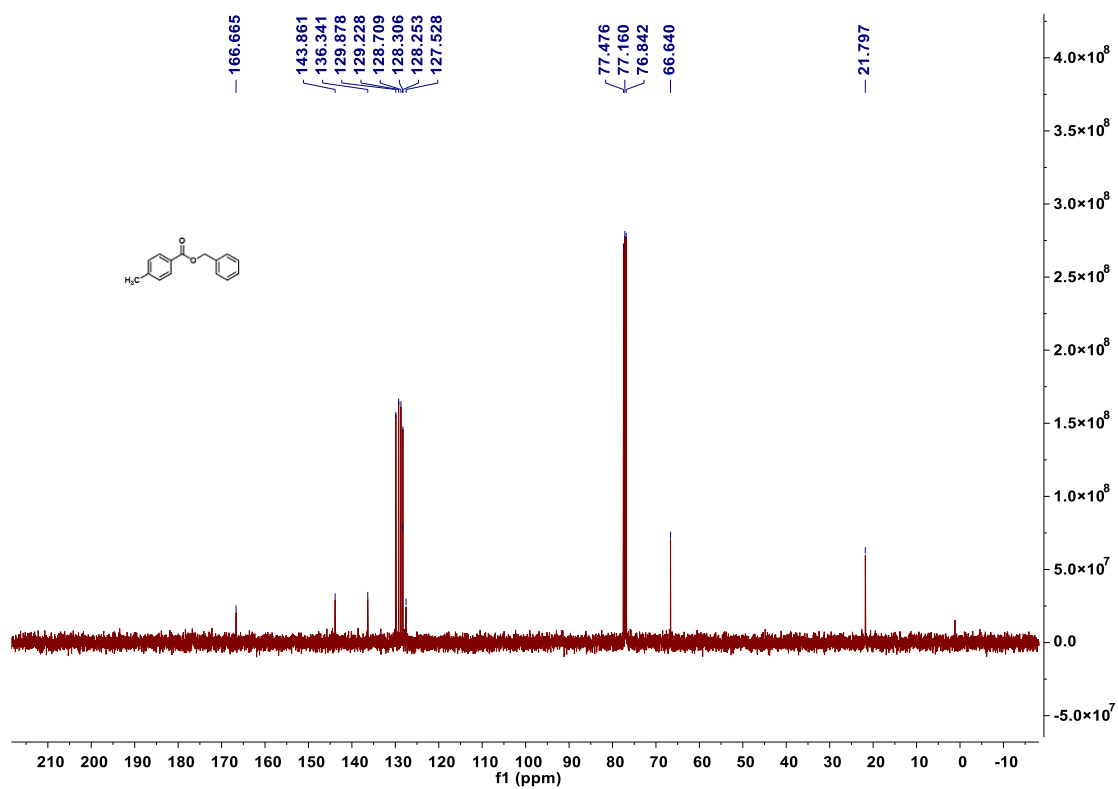

<sup>1</sup>H NMR-spectrum (400 MHz, CDCl<sub>3</sub>) of 31

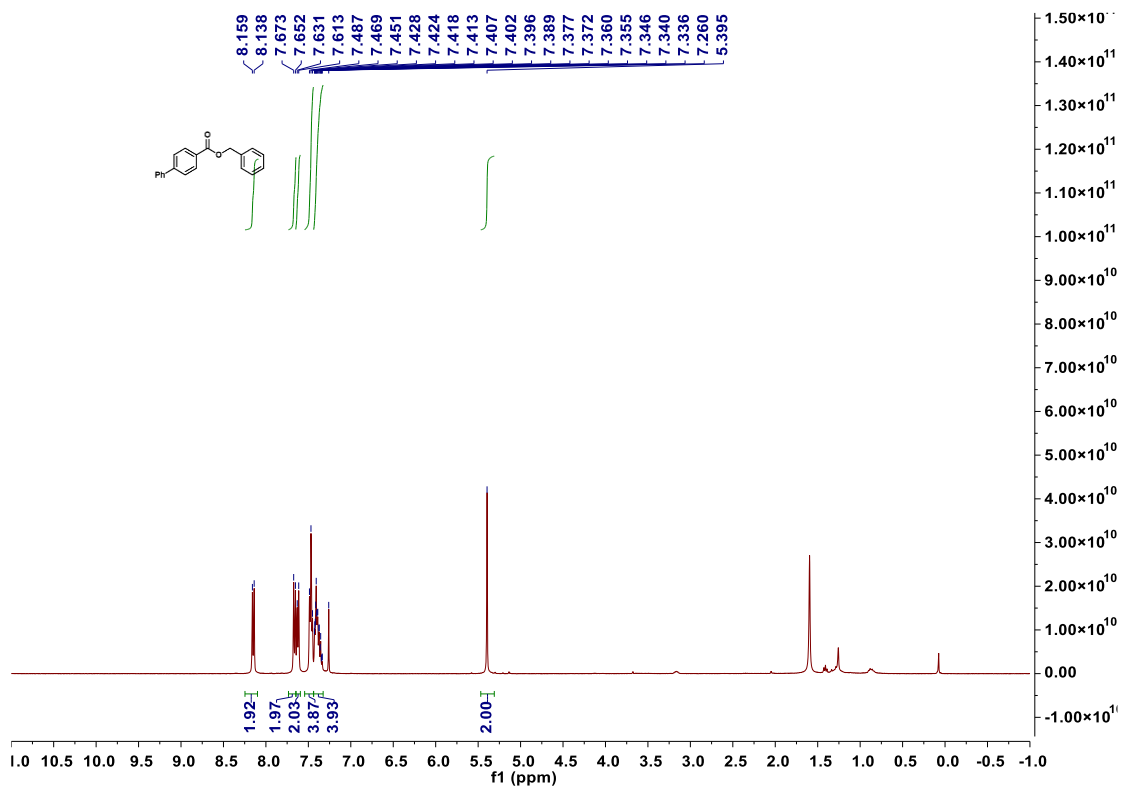

<sup>13</sup>C NMR-spectrum (100 MHz, CDCl<sub>3</sub>) of 31

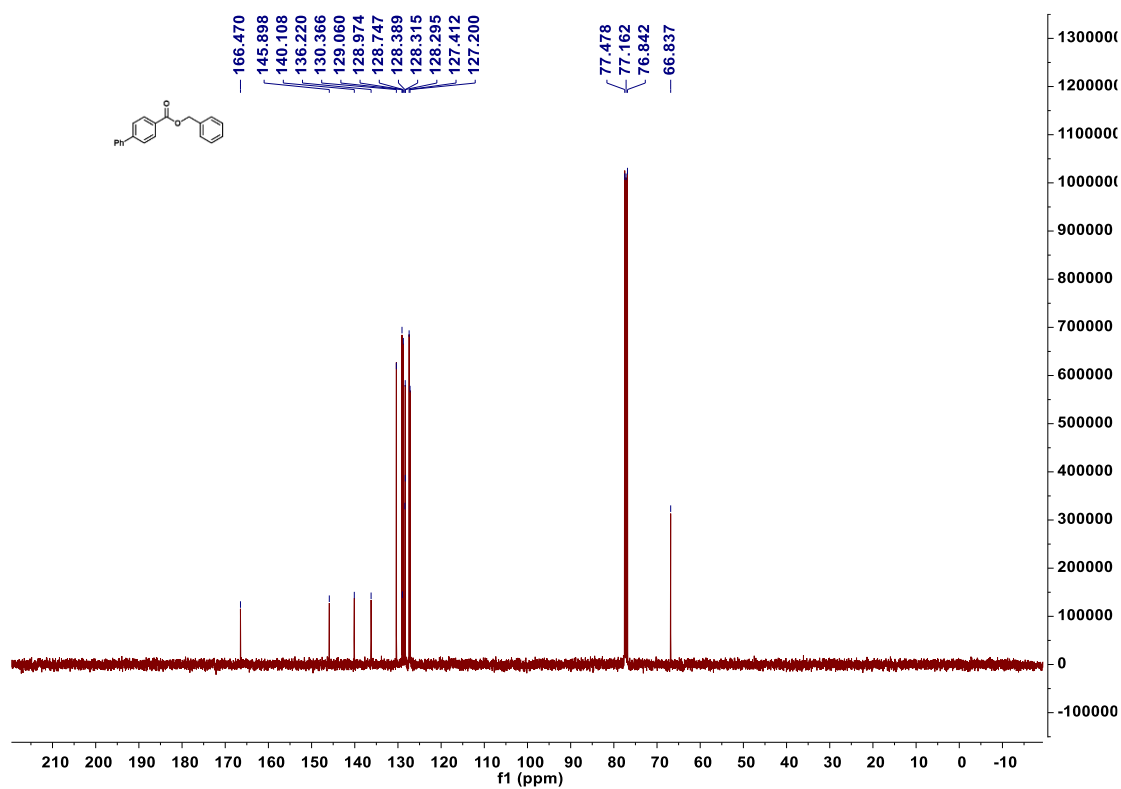

<sup>1</sup>H NMR-spectrum (400 MHz, CDCl<sub>3</sub>) of **3m**

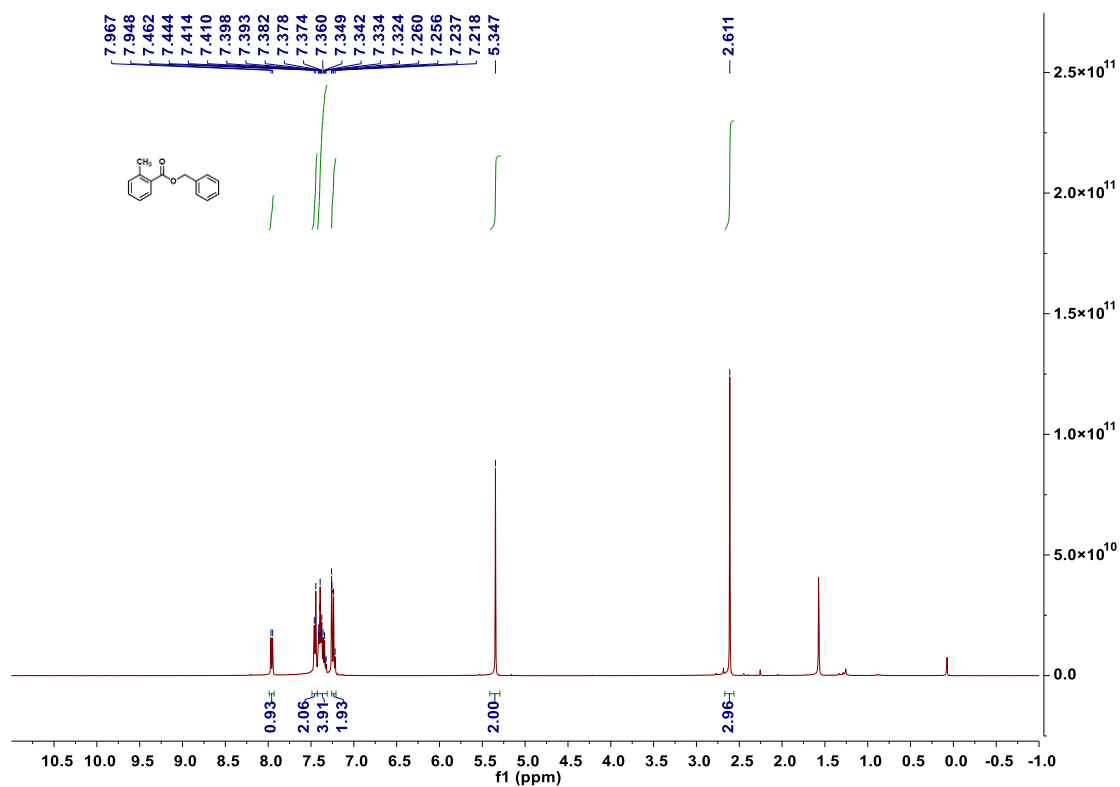

<sup>13</sup>C NMR-spectrum (100 MHz, CDCl<sub>3</sub>) of **3m**

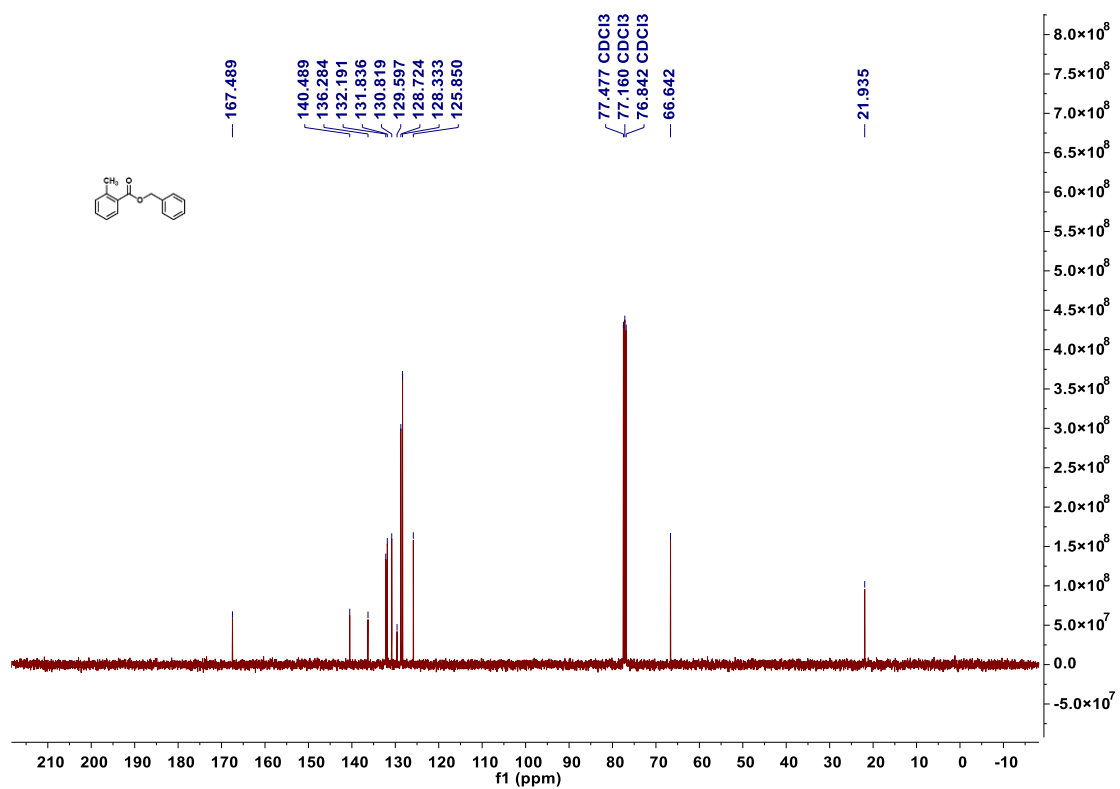

<sup>1</sup>H NMR-spectrum (400 MHz, CDCl<sub>3</sub>) of **3n**

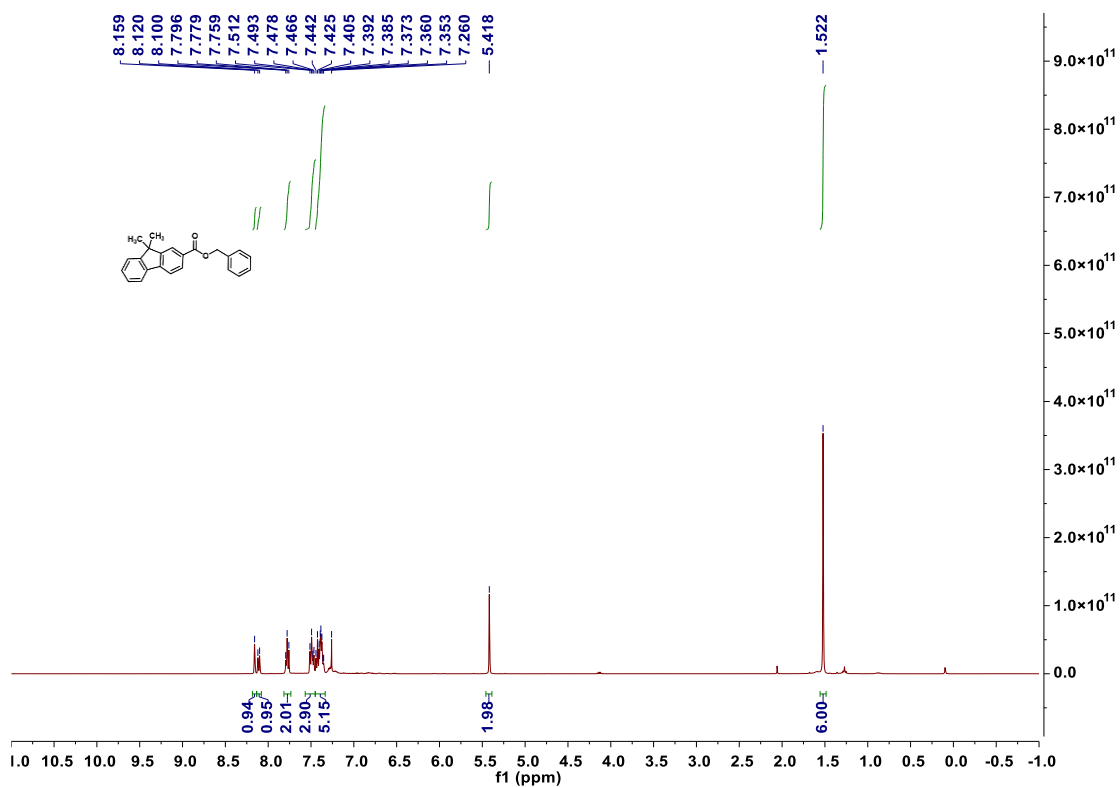

<sup>13</sup>C NMR-spectrum (100 MHz, CDCl<sub>3</sub>) of **3n**

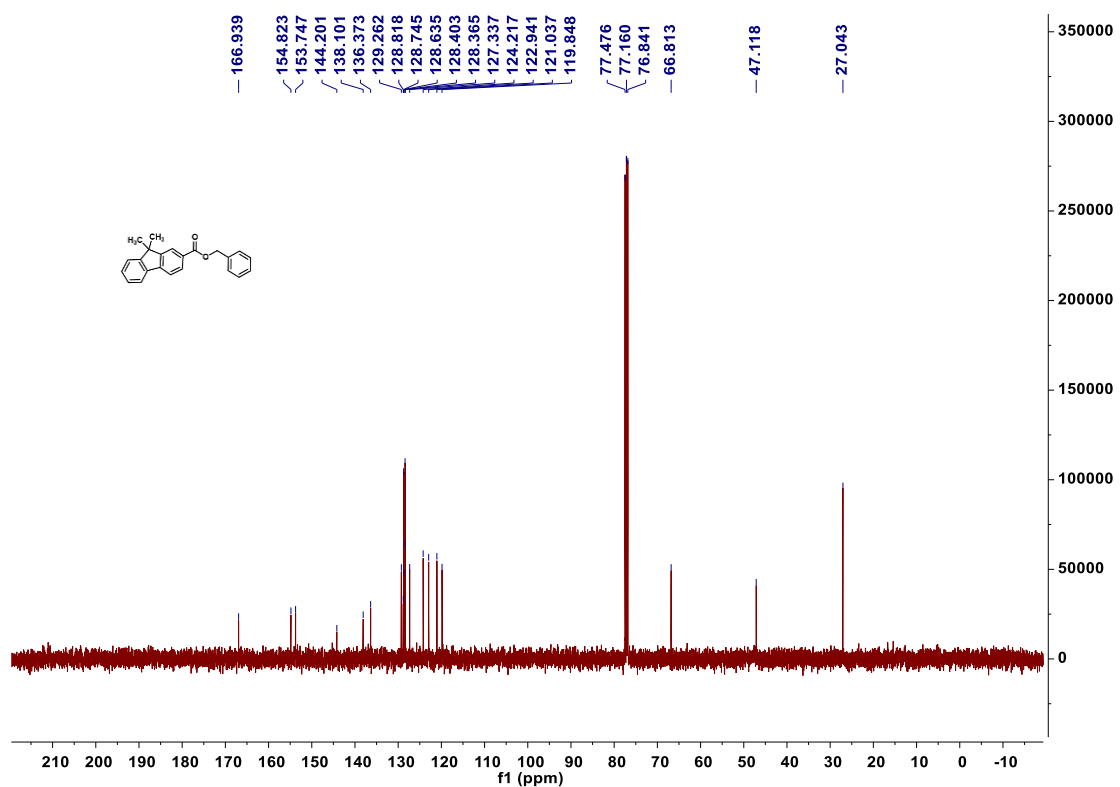

<sup>1</sup>H NMR-spectrum (400 MHz, CDCl<sub>3</sub>) of **3o**

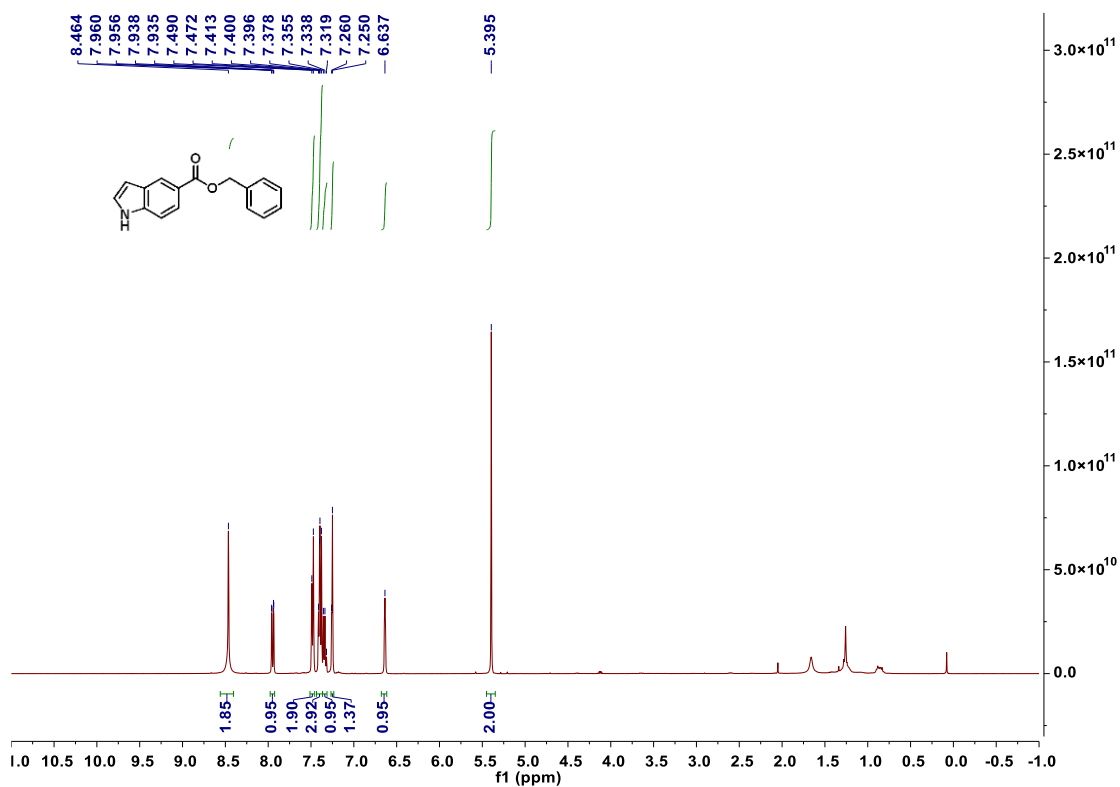

<sup>13</sup>C NMR-spectrum (100 MHz, CDCl<sub>3</sub>) of **3o**

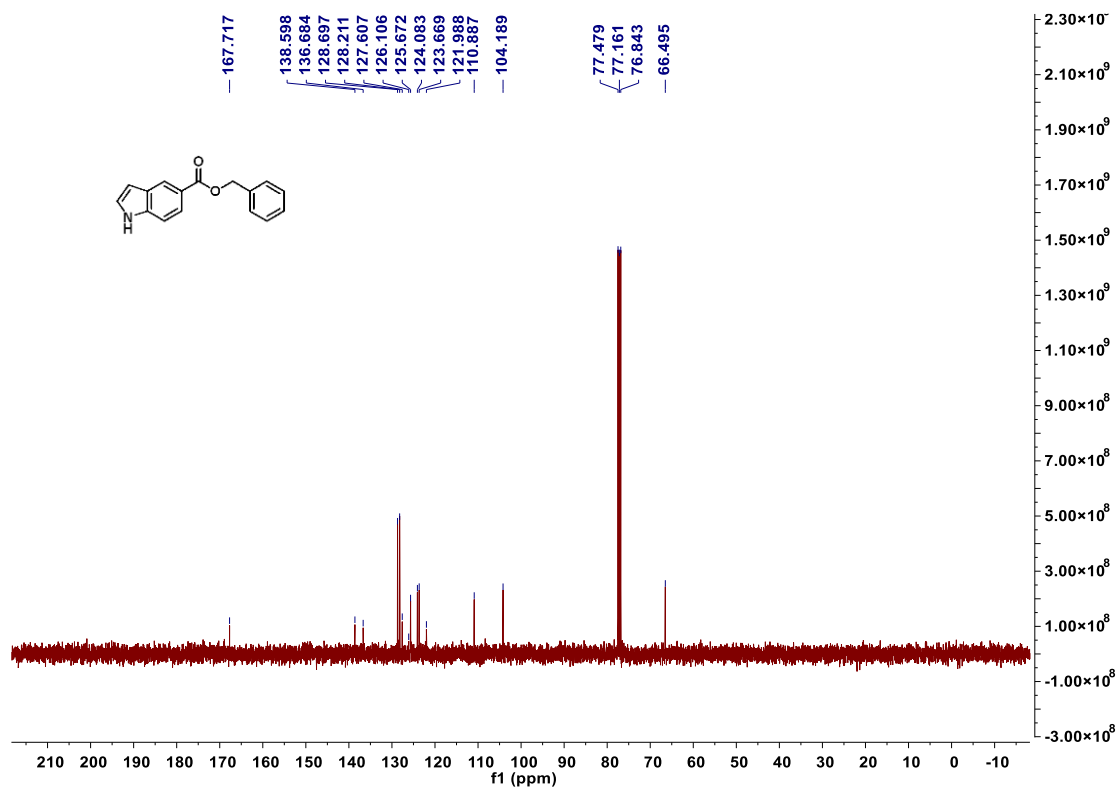

<sup>1</sup>H NMR-spectrum (400 MHz, CDCl<sub>3</sub>) of **3p**

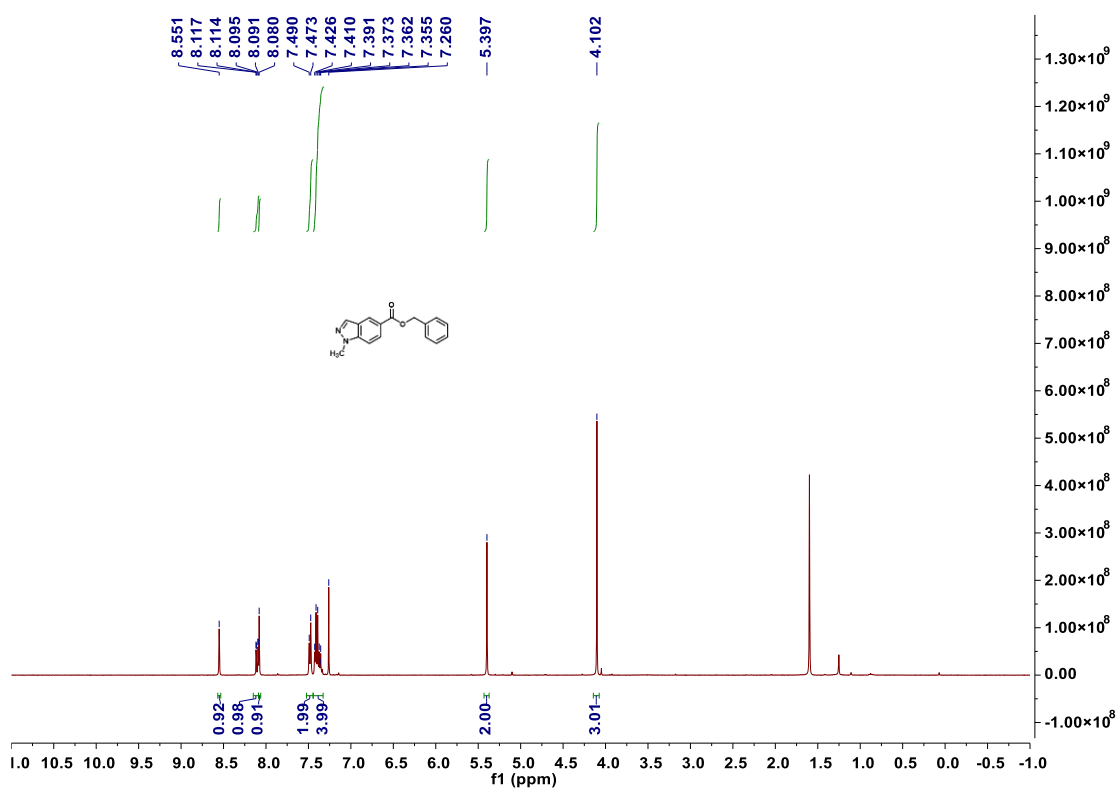

<sup>13</sup>C NMR-spectrum (100 MHz, CDCl<sub>3</sub>) of **3p**

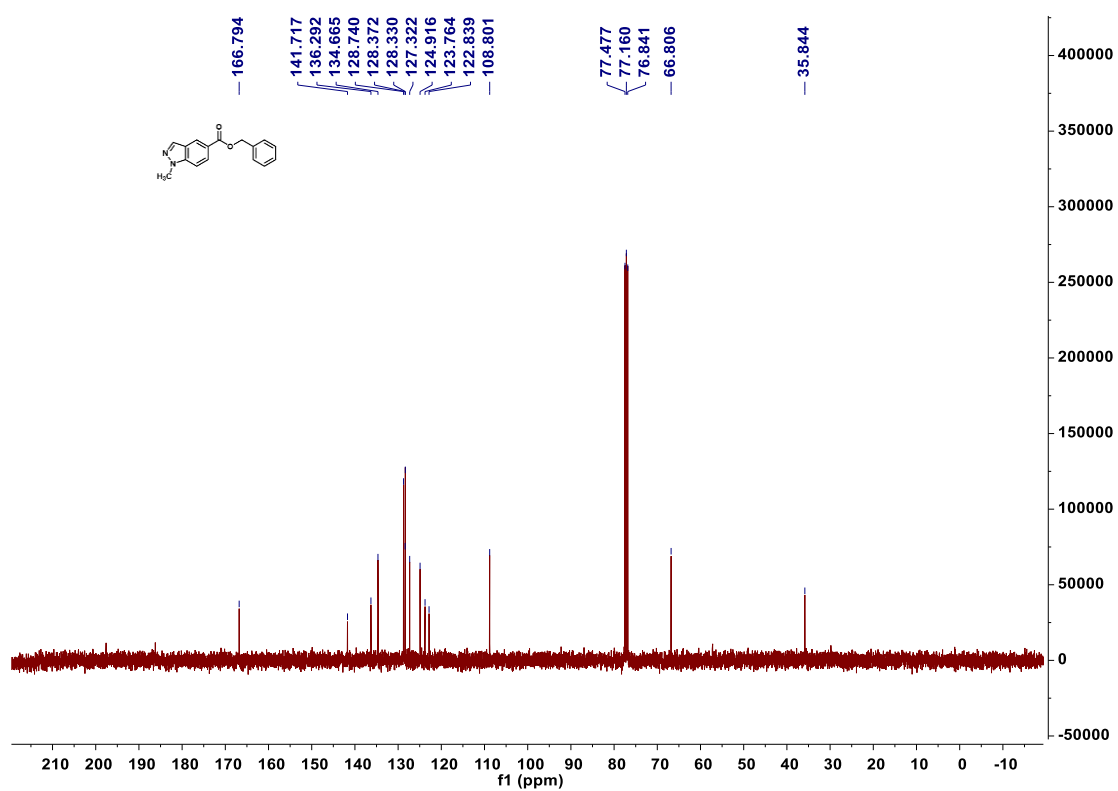



<sup>1</sup>H NMR-spectrum (400 MHz, CDCl<sub>3</sub>) of **3q**

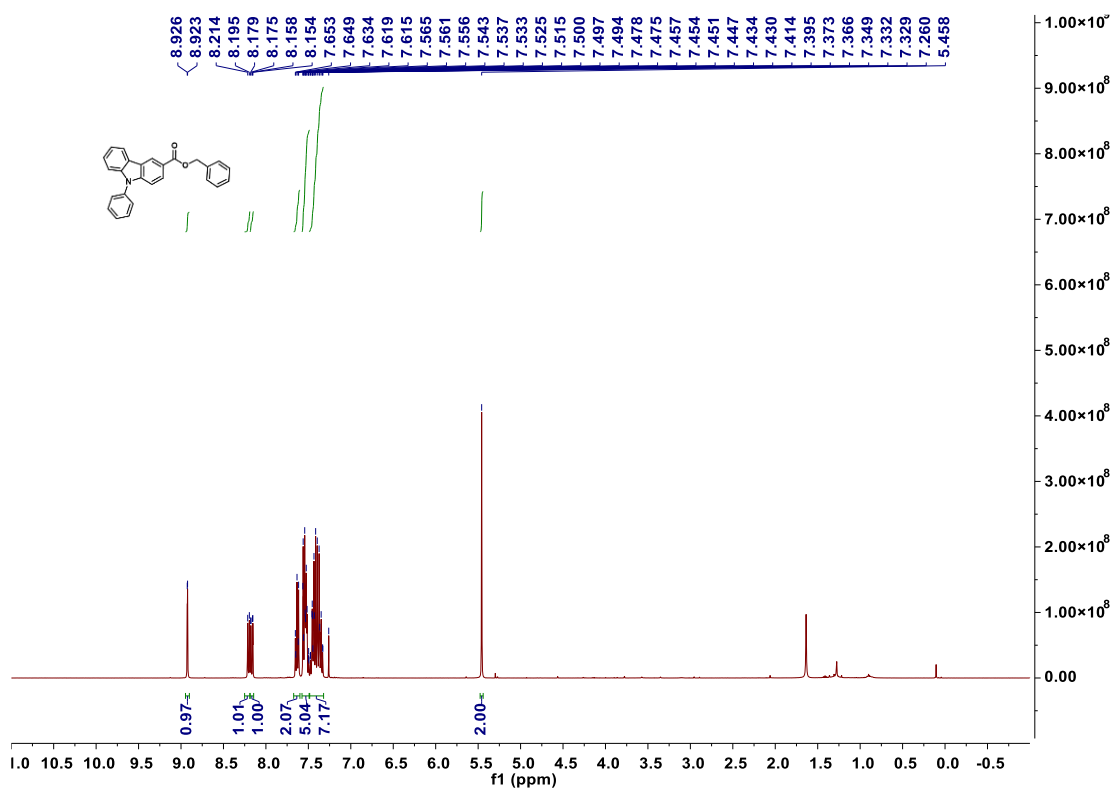

<sup>13</sup>C NMR-spectrum (100 MHz, CDCl<sub>3</sub>) of **3q**

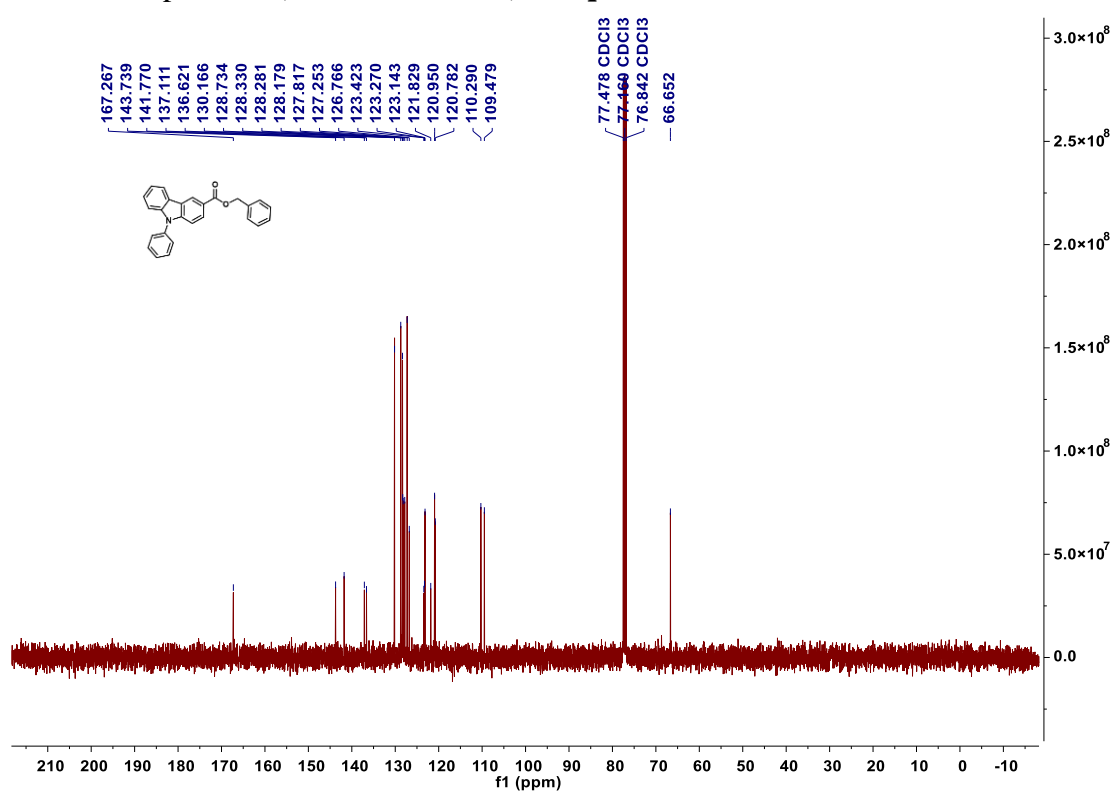

<sup>1</sup>H NMR-spectrum (400 MHz, CDCl<sub>3</sub>) of **3r**

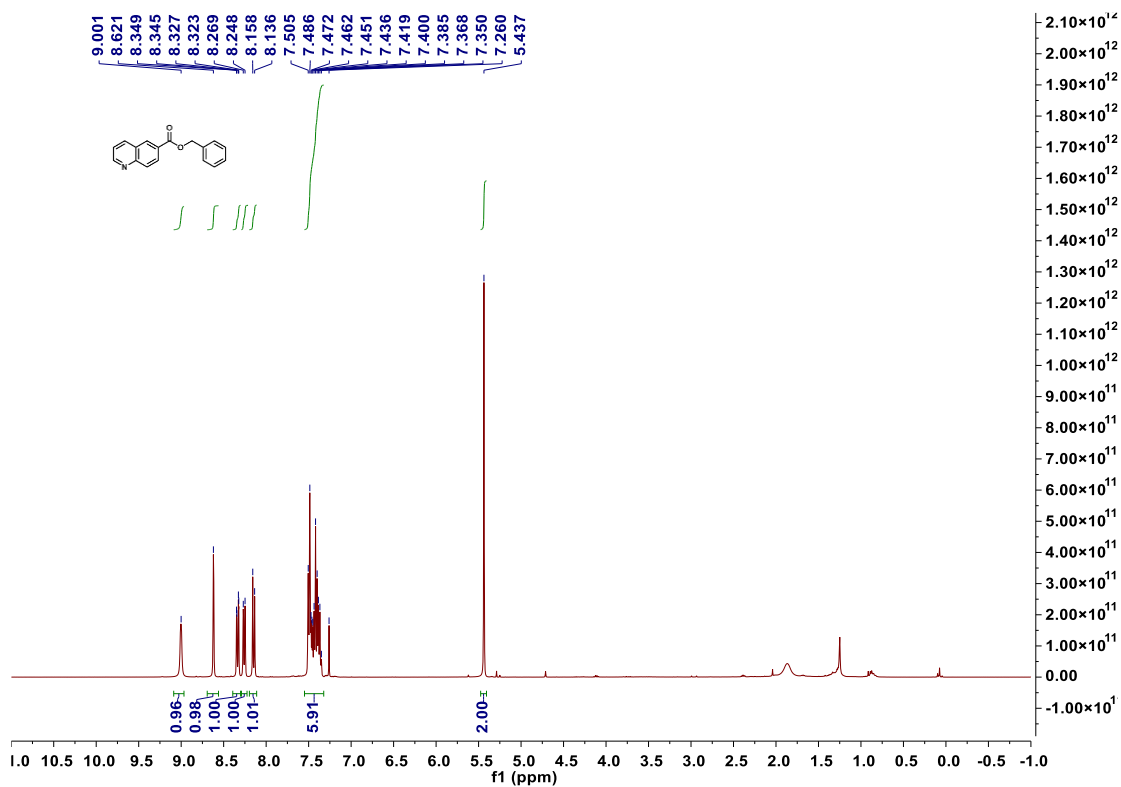

<sup>13</sup>C NMR-spectrum (100 MHz, CDCl<sub>3</sub>) of **3r**

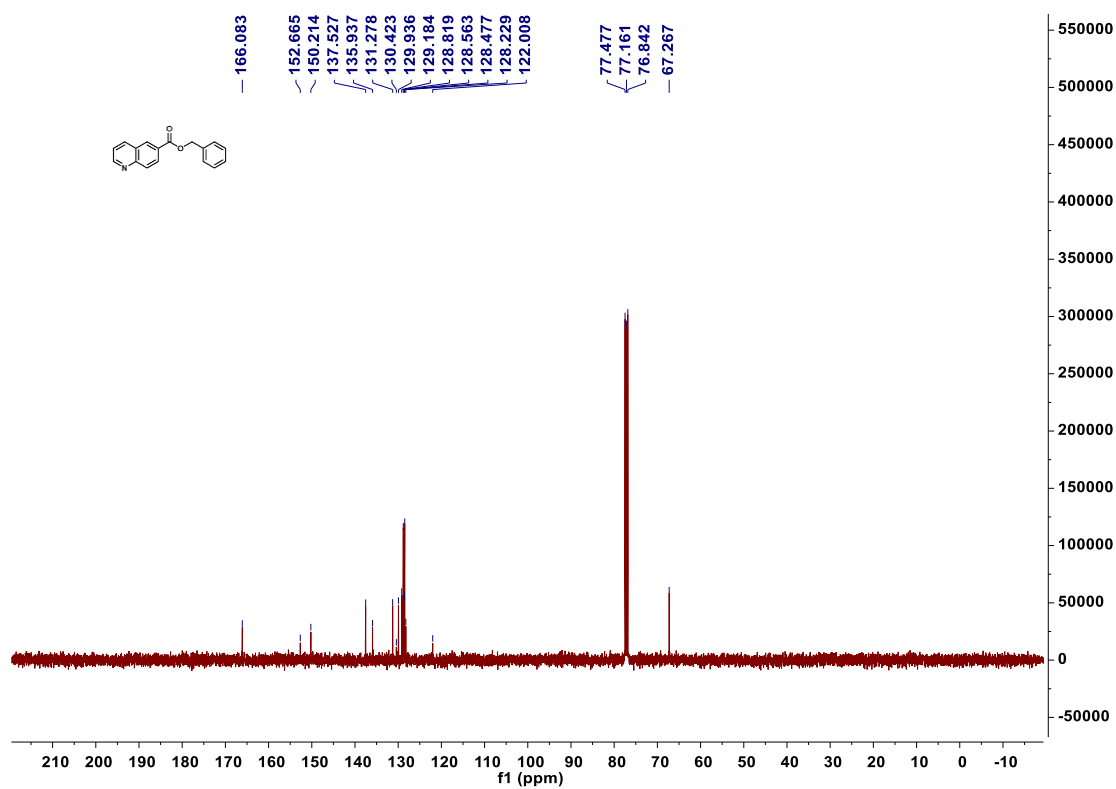

### <sup>1</sup>H NMR-spectrum (400 MHz, CDCl<sub>3</sub>) of 3s

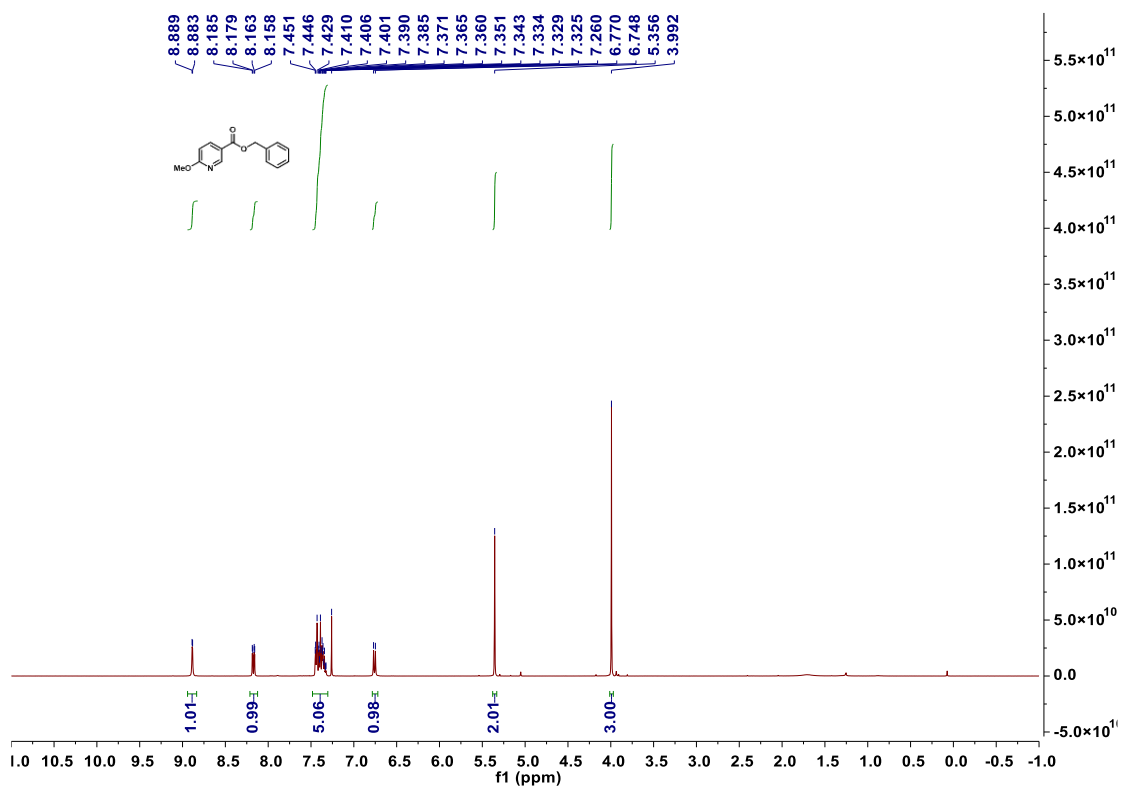

### <sup>13</sup>C NMR-spectrum (100 MHz, CDCl<sub>3</sub>) of 3s

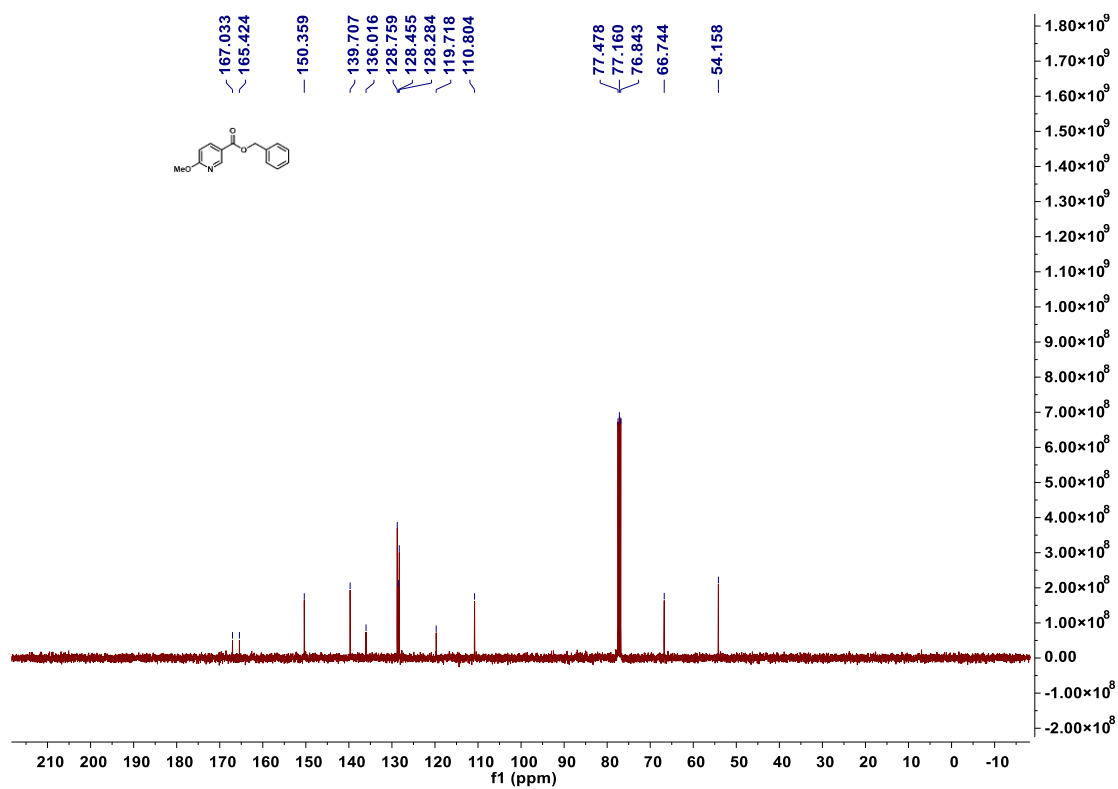

<sup>1</sup>H NMR-spectrum (400 MHz, CDCl<sub>3</sub>) of 3t

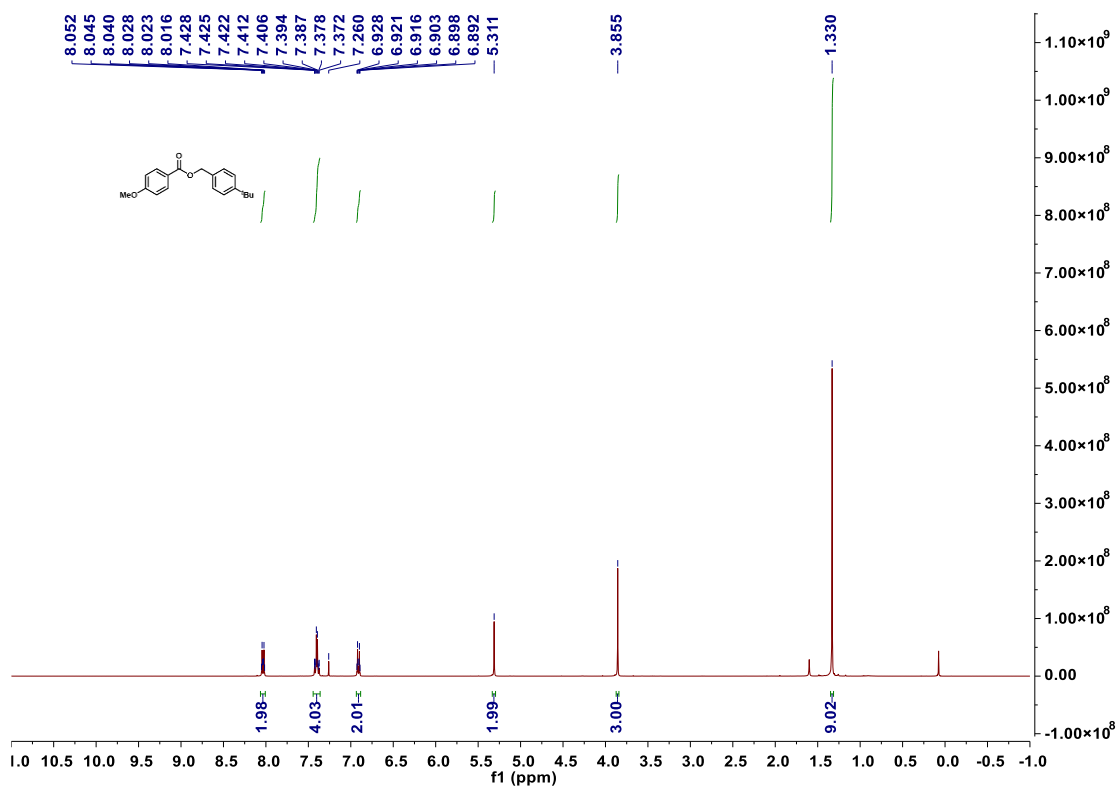

<sup>13</sup>C NMR-spectrum (100 MHz, CDCl<sub>3</sub>) of 3t

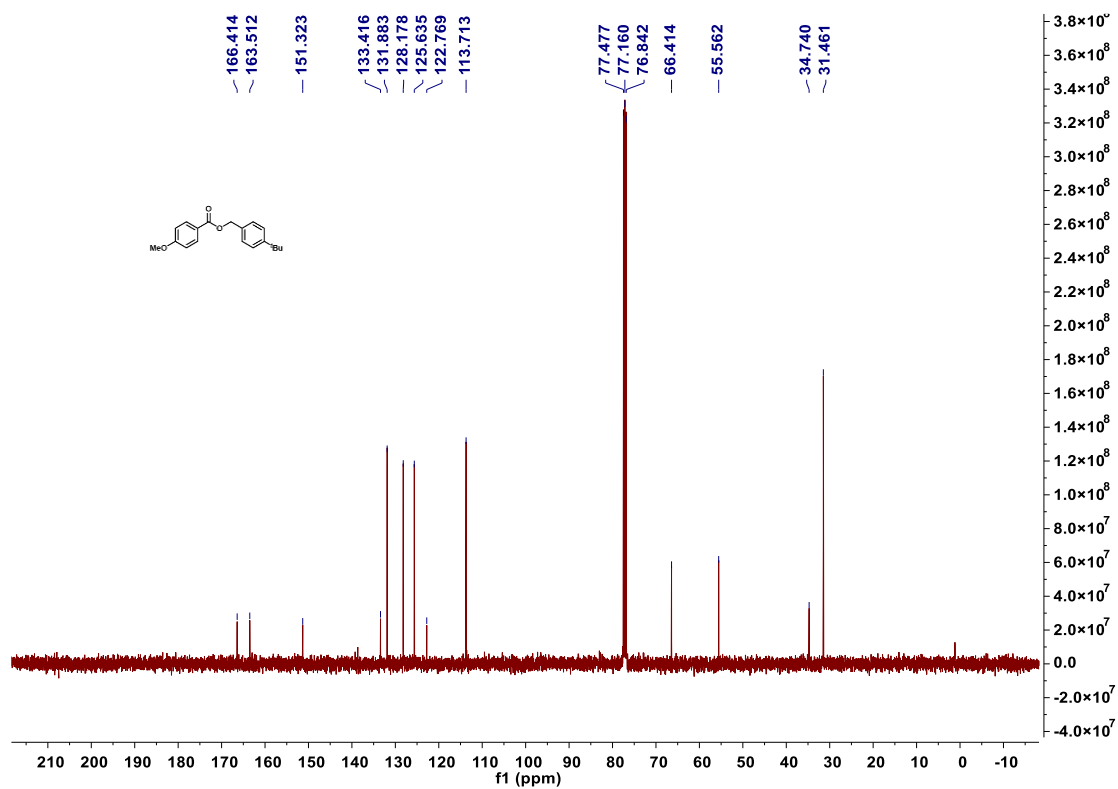

<sup>1</sup>H NMR-spectrum (400 MHz, CDCl<sub>3</sub>) of **3u**

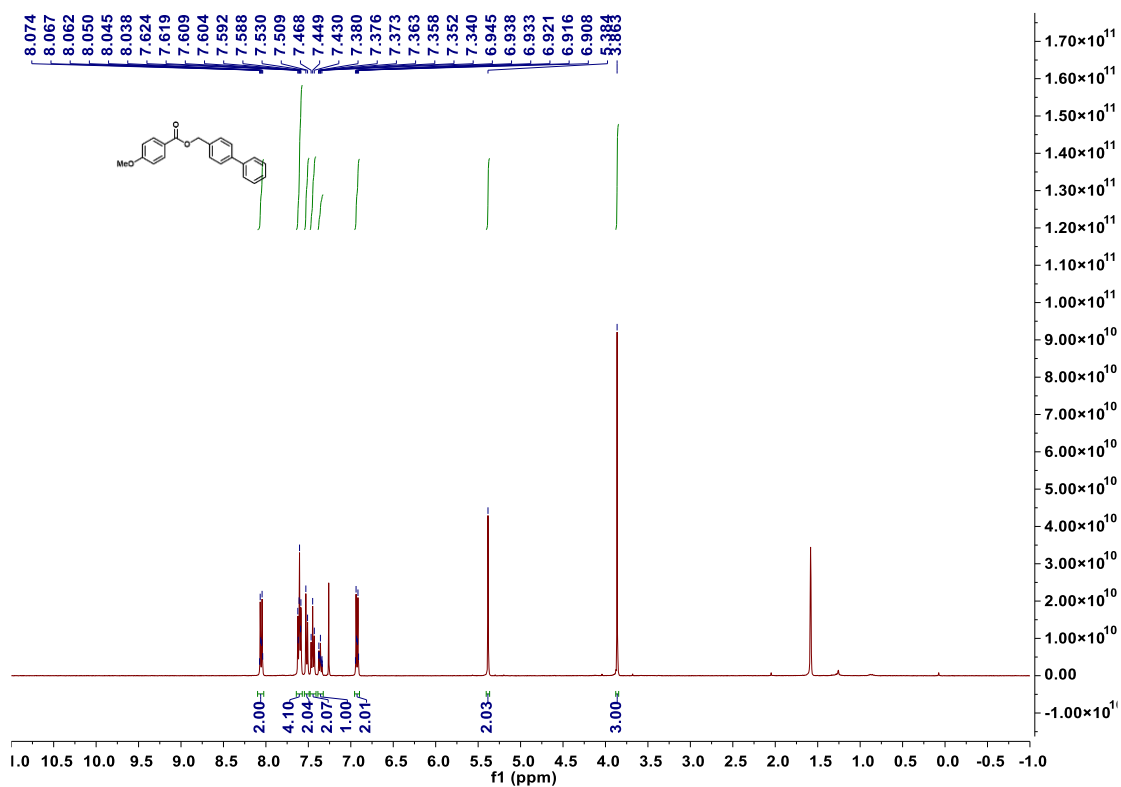

<sup>13</sup>C NMR-spectrum (100 MHz, CDCl<sub>3</sub>) of **3u**

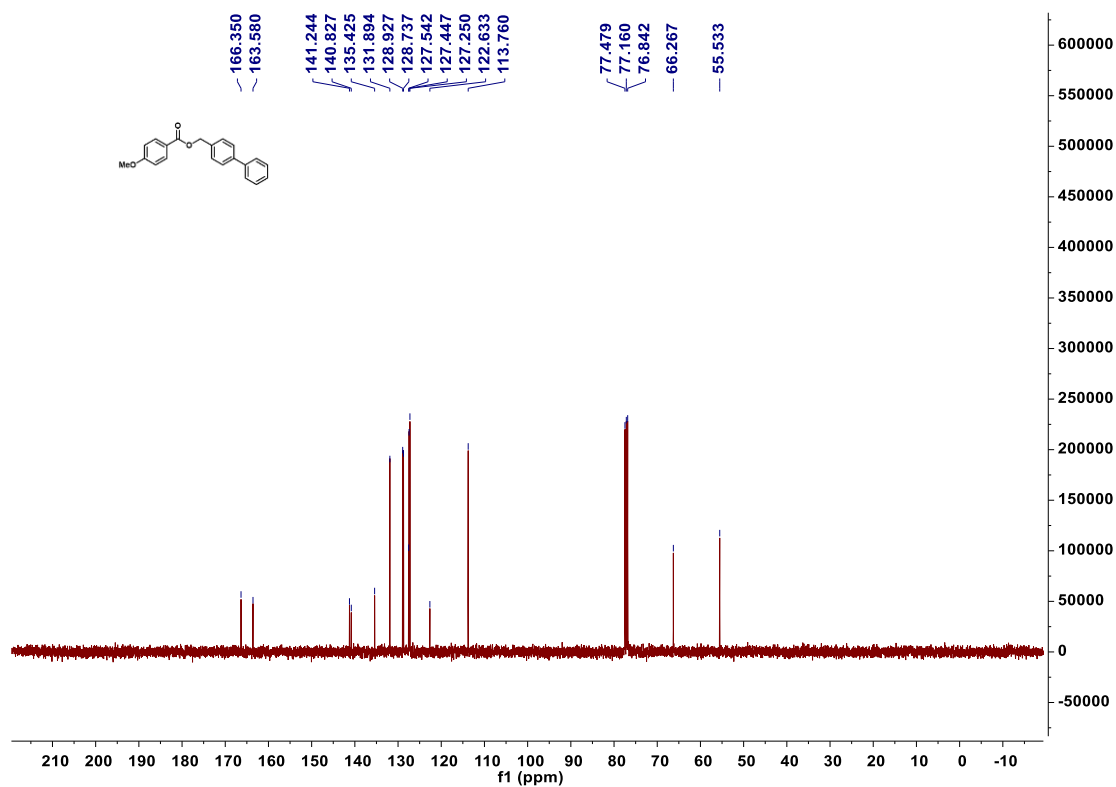

<sup>1</sup>H NMR-spectrum (400 MHz, CDCl<sub>3</sub>) of **3v**

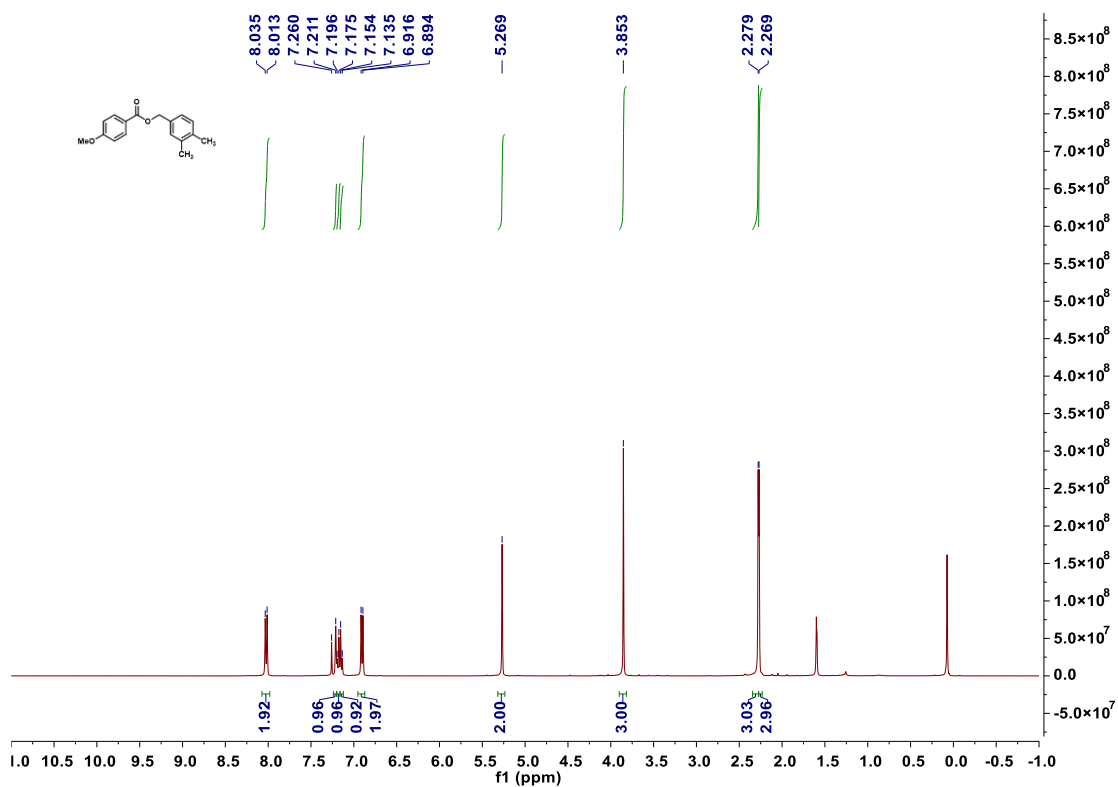

<sup>13</sup>C NMR-spectrum (100 MHz, CDCl<sub>3</sub>) of **3v**

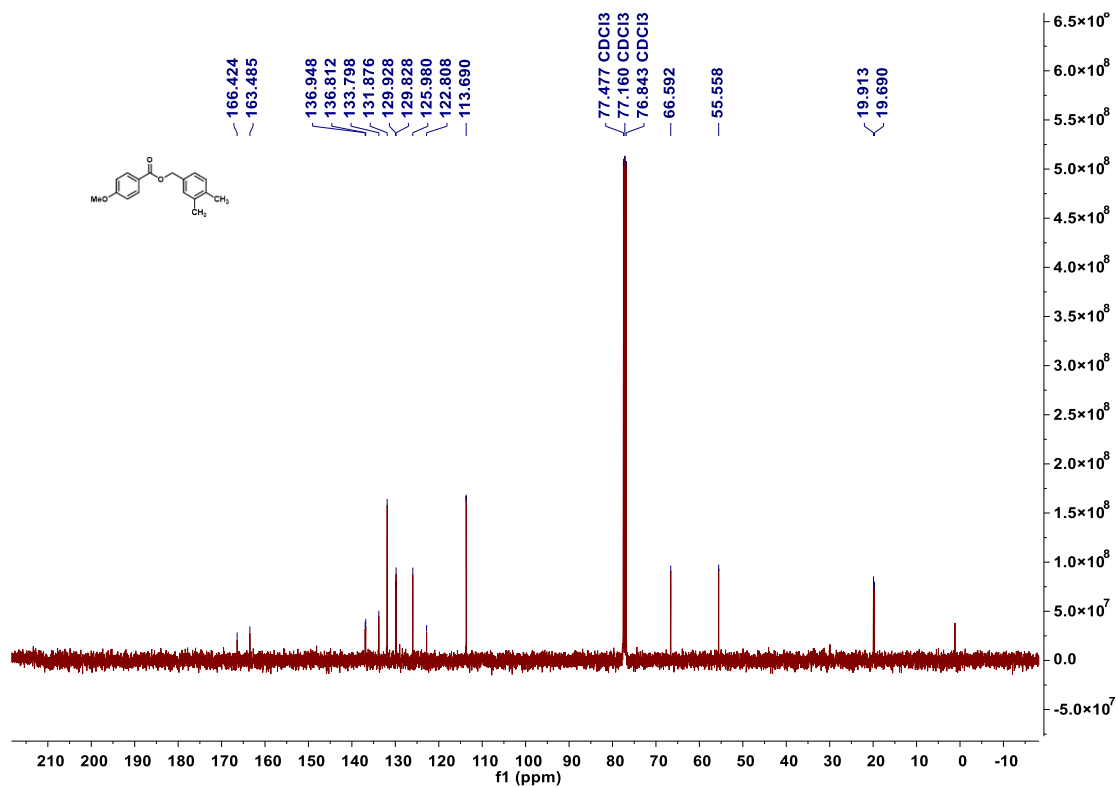

<sup>1</sup>H NMR-spectrum (400 MHz, CDCl<sub>3</sub>) of 3w

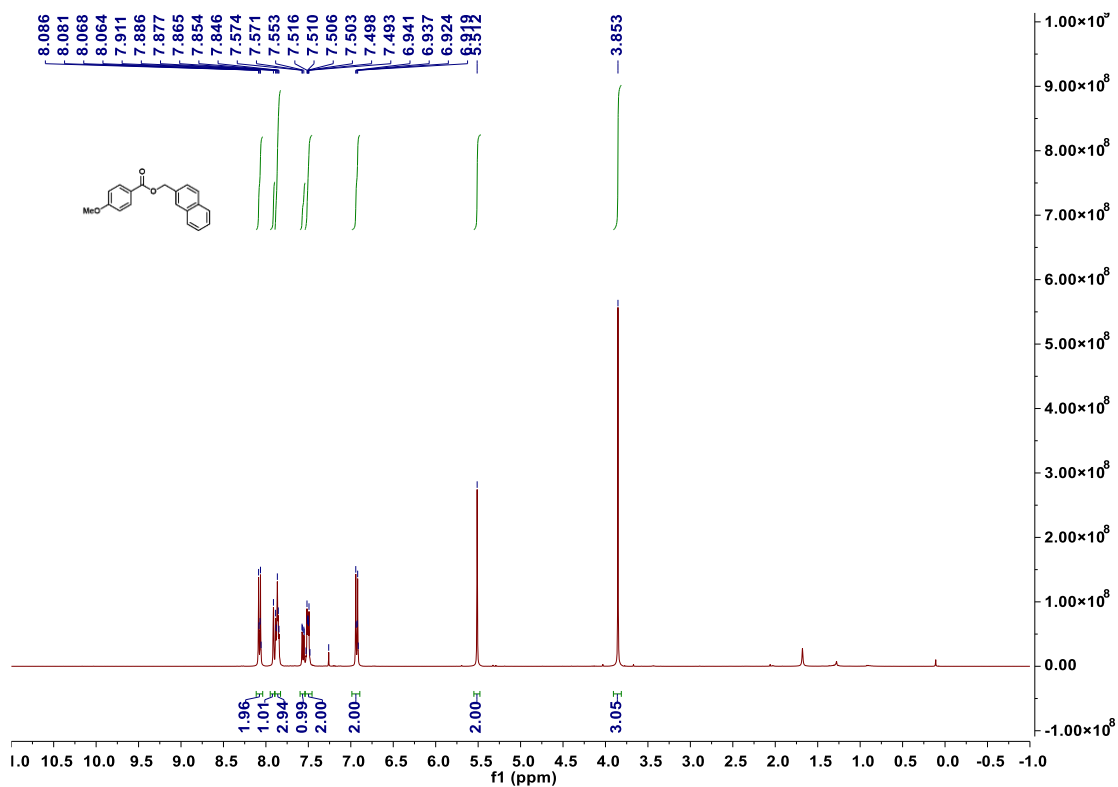

<sup>13</sup>C NMR-spectrum (100 MHz, CDCl<sub>3</sub>) of 3w

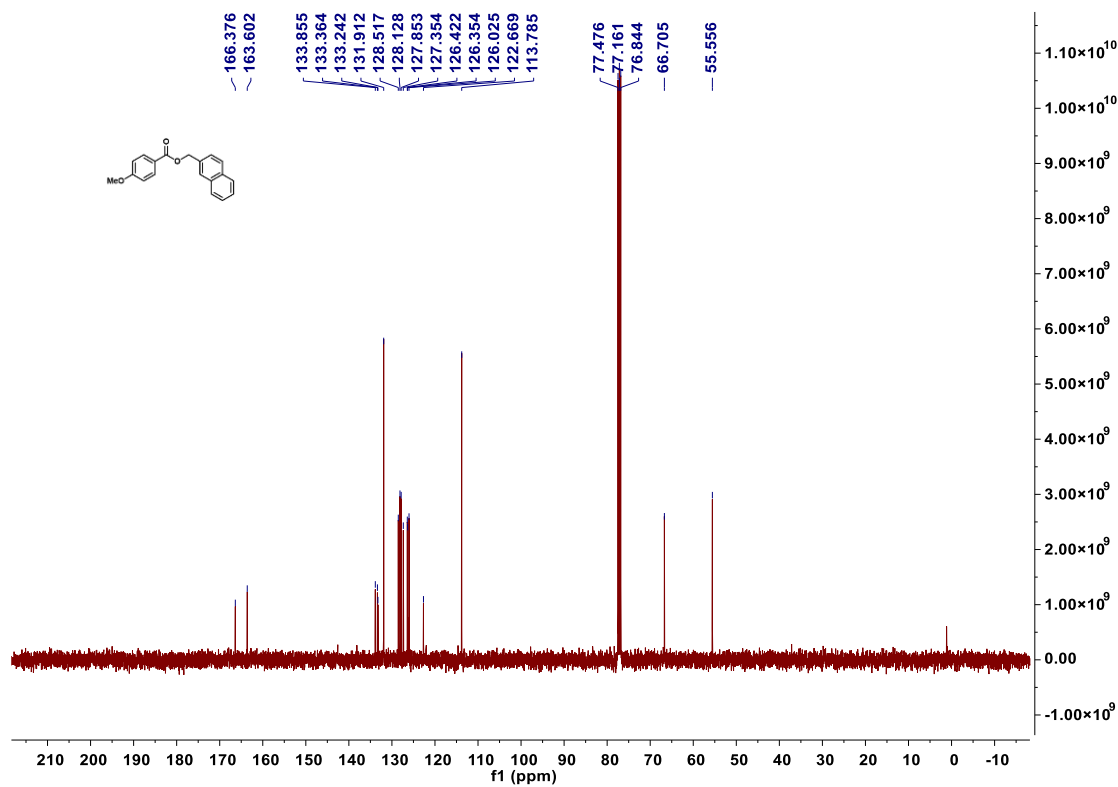

<sup>1</sup>H NMR-spectrum (400 MHz, CDCl<sub>3</sub>) of 3x

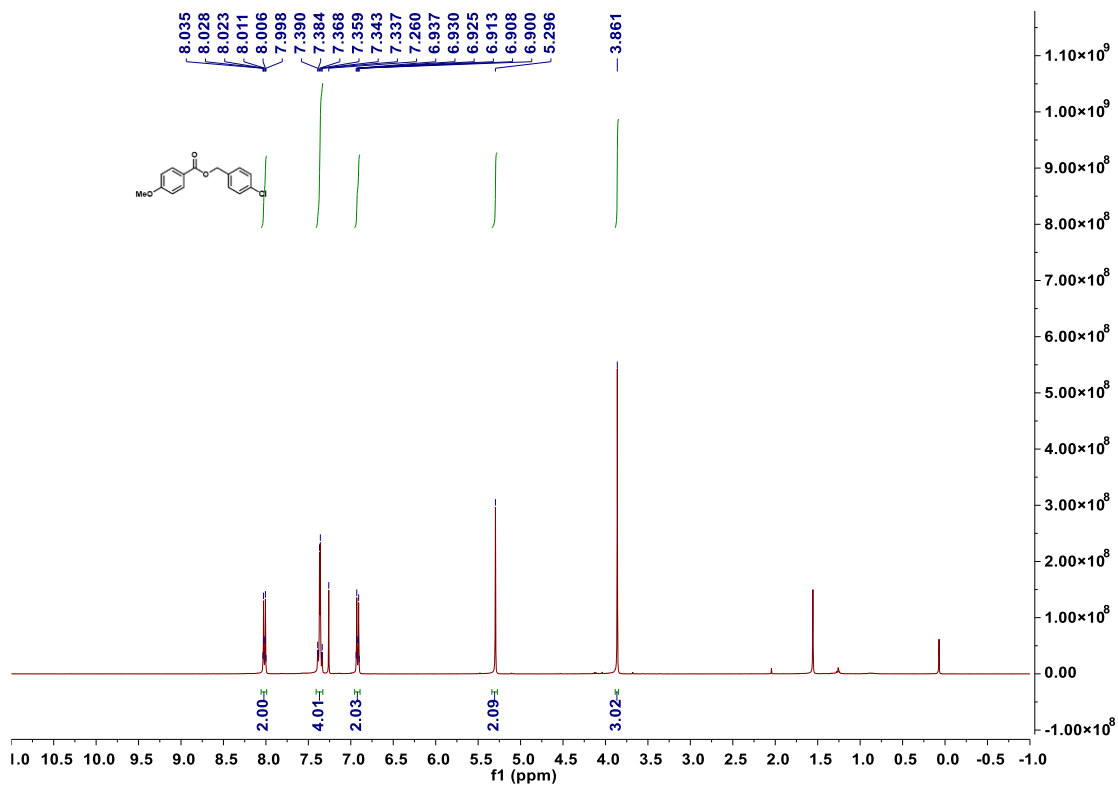

<sup>13</sup>C NMR-spectrum (100 MHz, CDCl<sub>3</sub>) of 3x

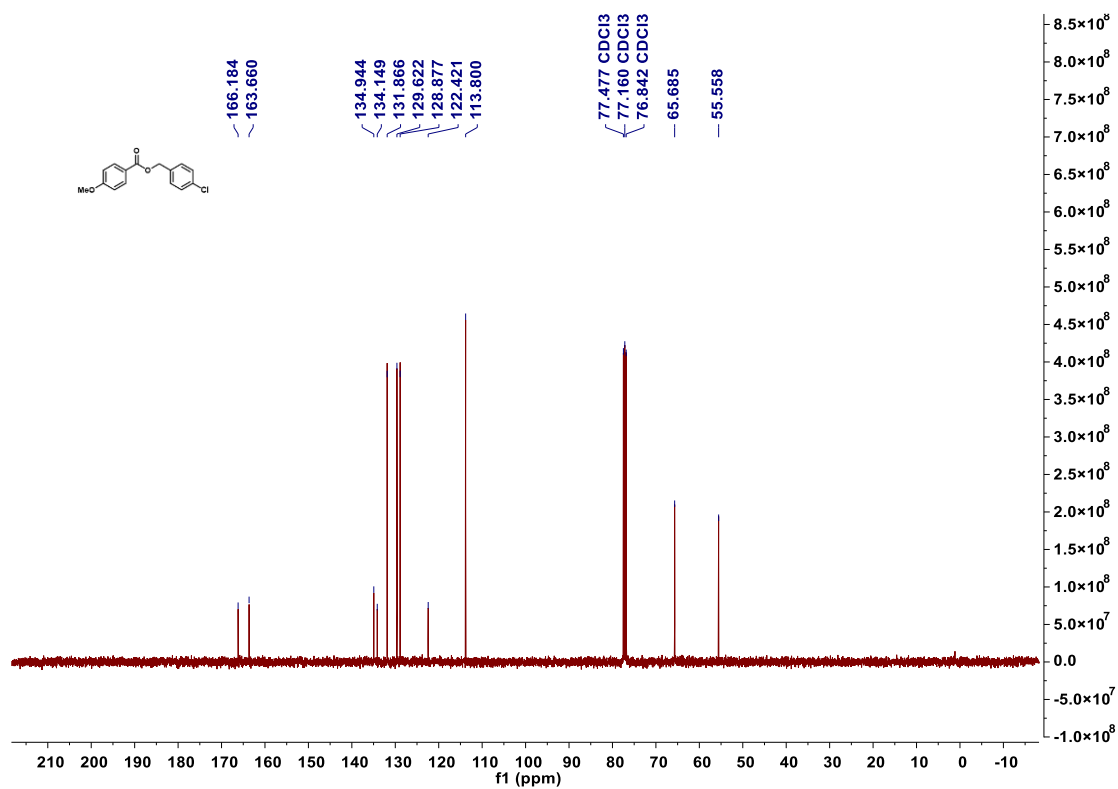



### <sup>1</sup>H NMR-spectrum (400 MHz, CDCl<sub>3</sub>) of **3y**

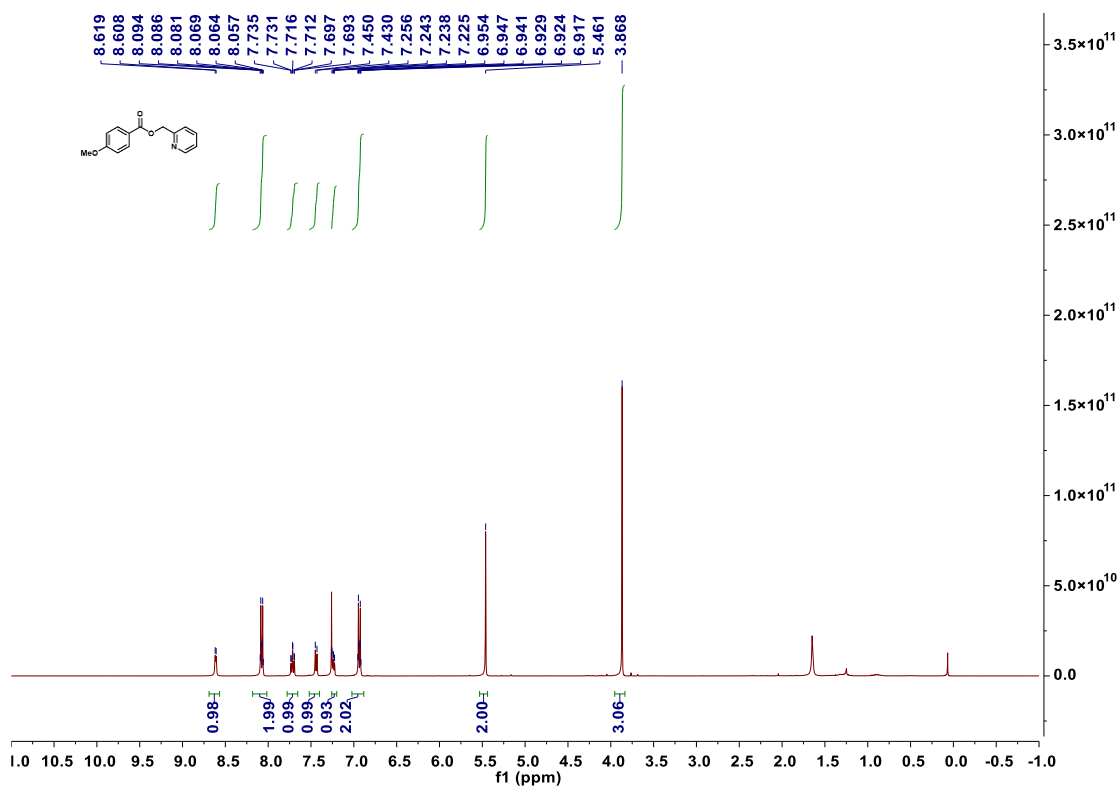

### <sup>13</sup>C NMR-spectrum (100 MHz, CDCl<sub>3</sub>) of **3y**

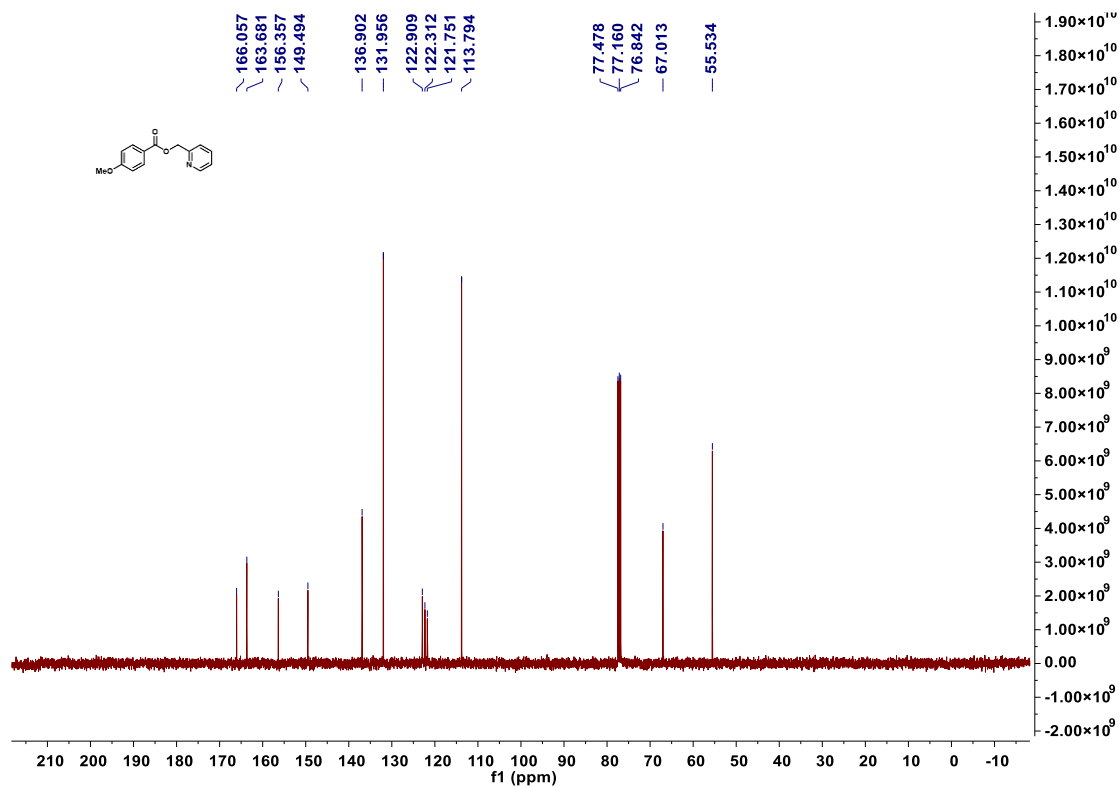

<sup>1</sup>H NMR-spectrum (400 MHz, CDCl<sub>3</sub>) of **3z**

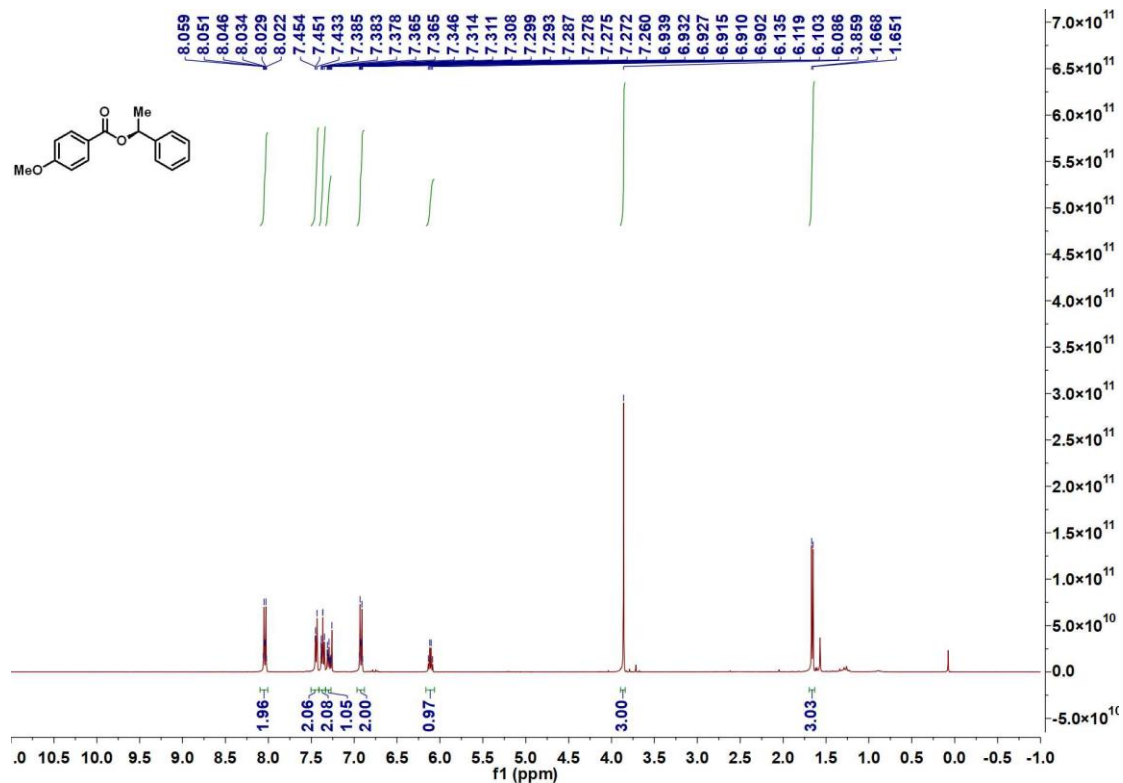

<sup>13</sup>C NMR-spectrum (100 MHz, CDCl<sub>3</sub>) of **3z**

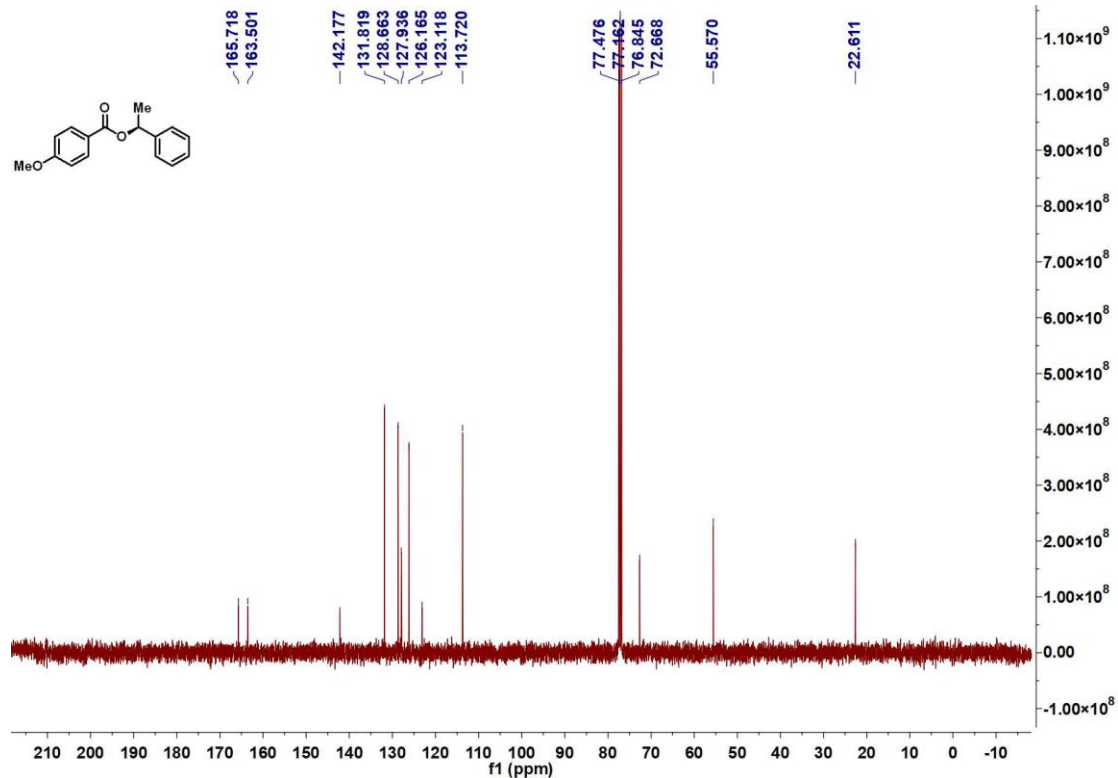

### <sup>1</sup>H NMR-spectrum (400 MHz, CDCl<sub>3</sub>) of 3aa

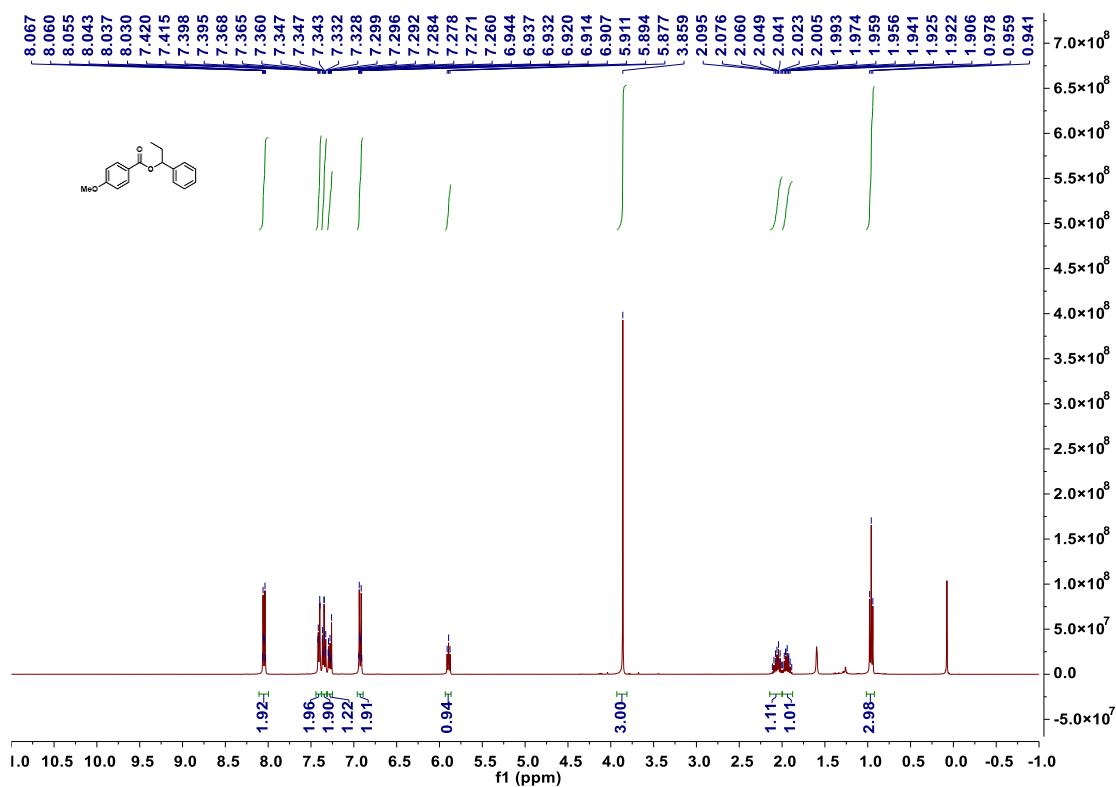

### <sup>13</sup>C NMR-spectrum (100 MHz, CDCl<sub>3</sub>) of 3aa

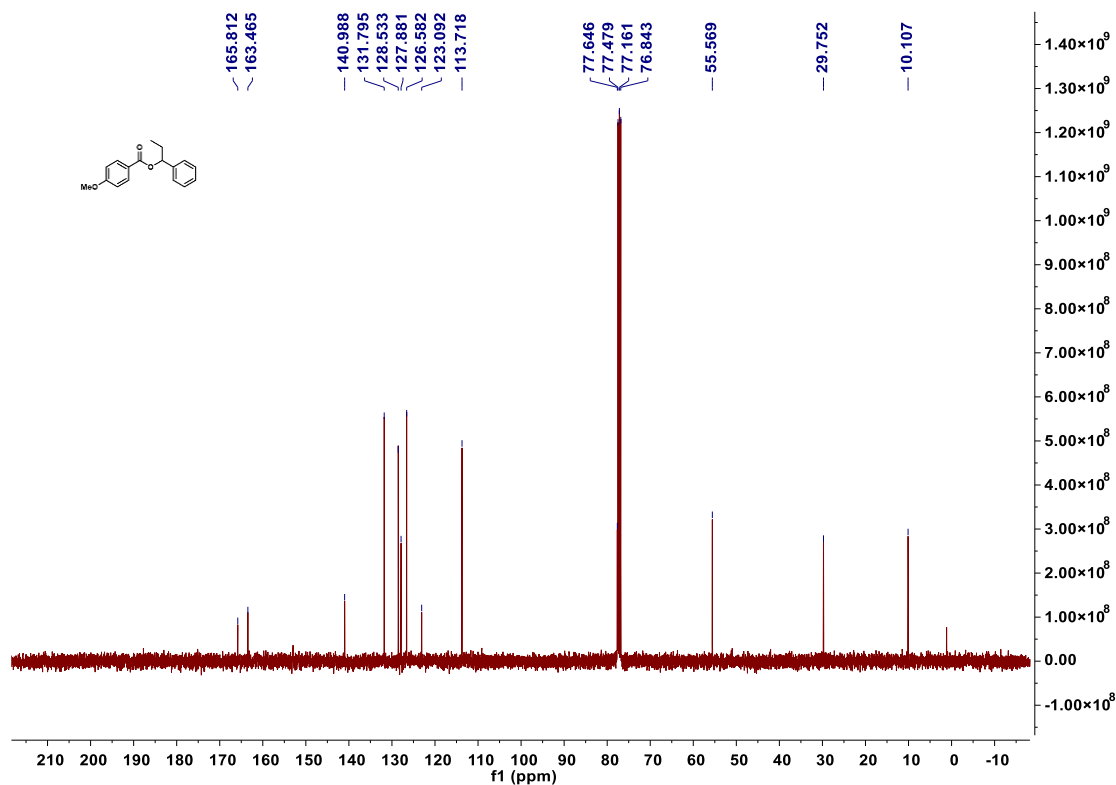

### <sup>1</sup>H NMR-spectrum (400 MHz, CDCl<sub>3</sub>) of **3ab**

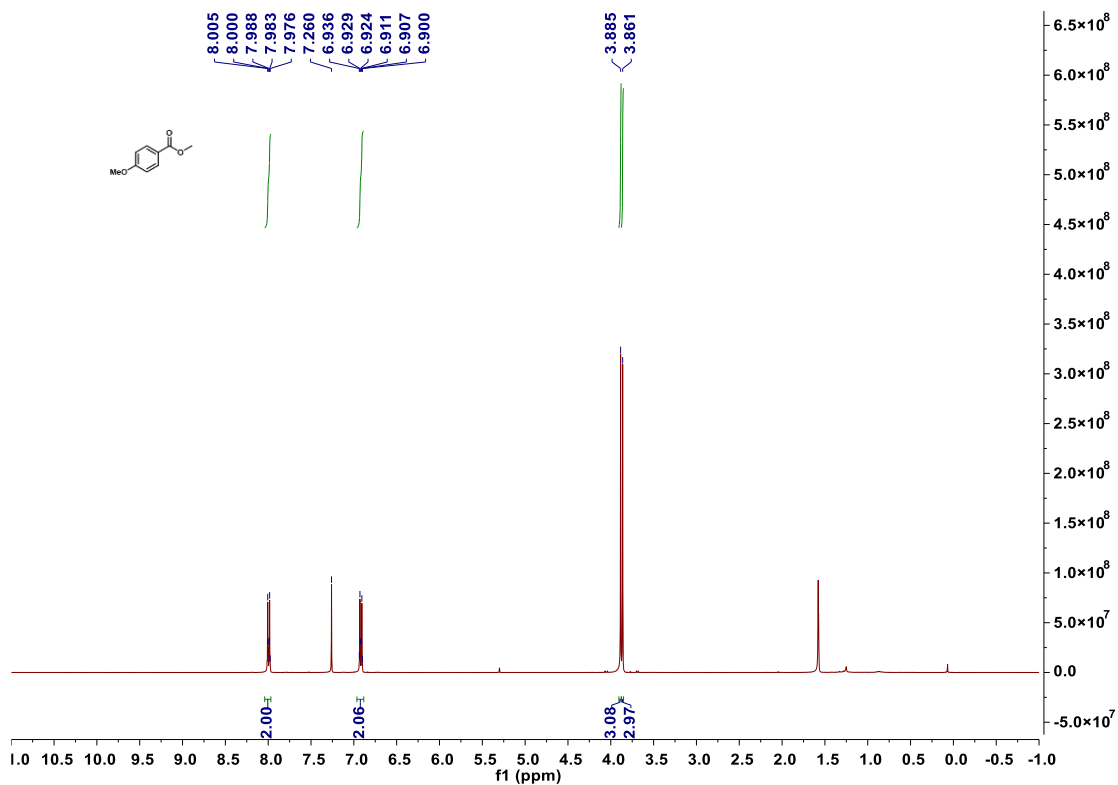

### <sup>13</sup>C NMR-spectrum (100 MHz, CDCl<sub>3</sub>) of **3ab**

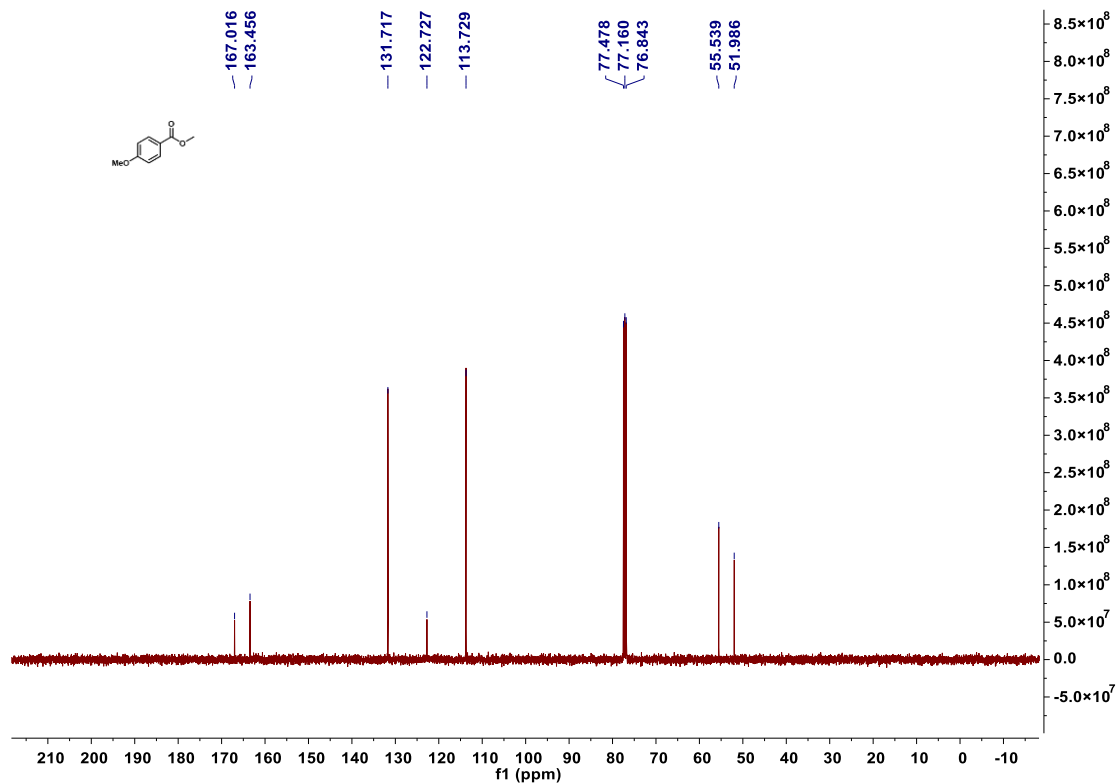

<sup>1</sup>H NMR-spectrum (400 MHz, CDCl<sub>3</sub>) of **3ac**

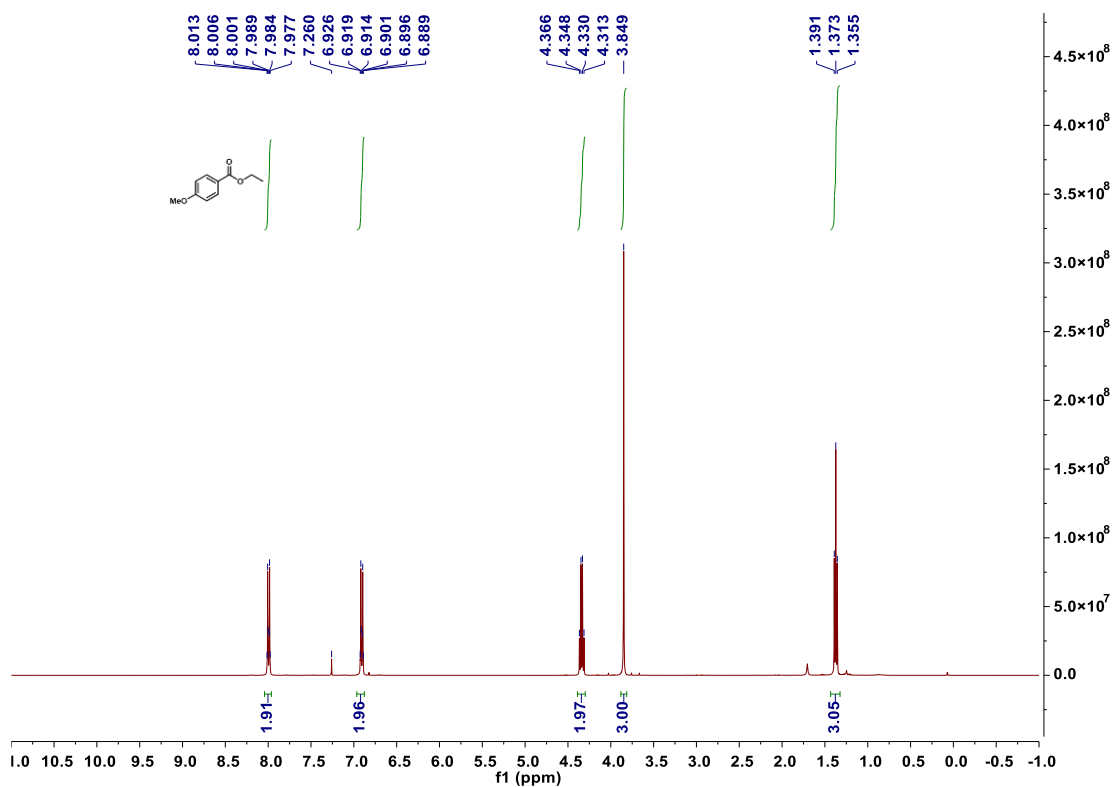

<sup>13</sup>C NMR-spectrum (100 MHz, CDCl<sub>3</sub>) of **3ac**

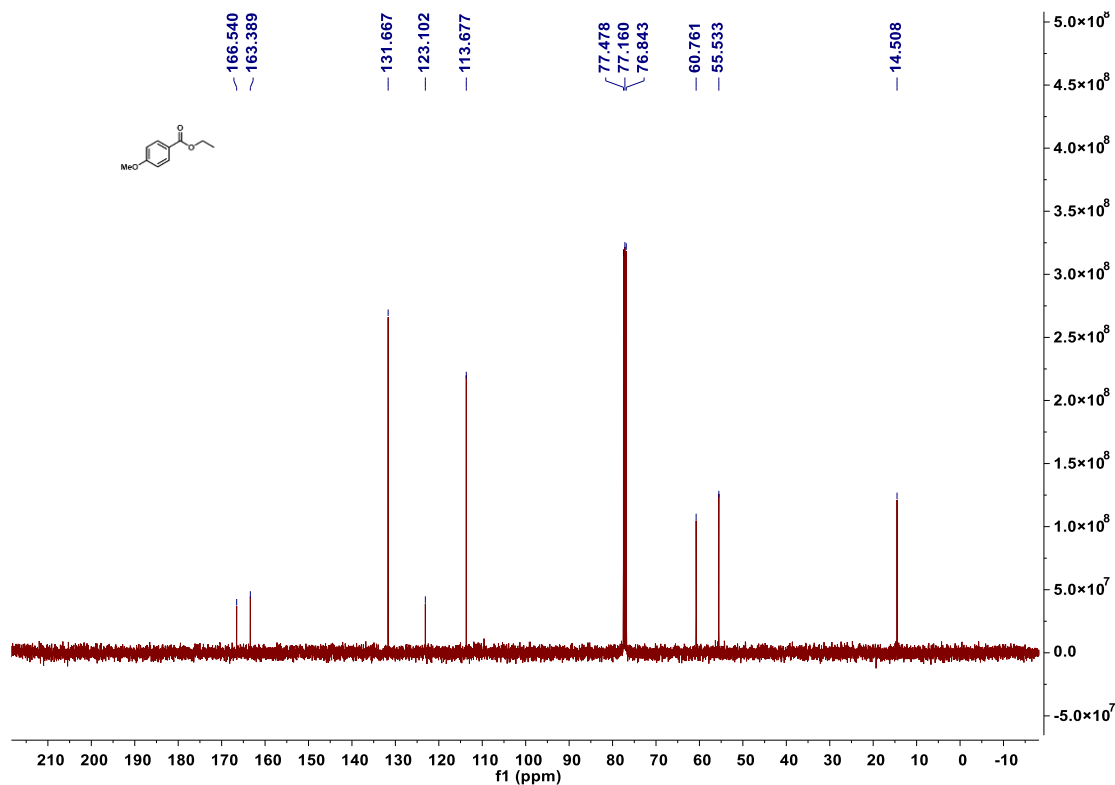

### <sup>1</sup>H NMR-spectrum (400 MHz, CDCl<sub>3</sub>) of **3ad**

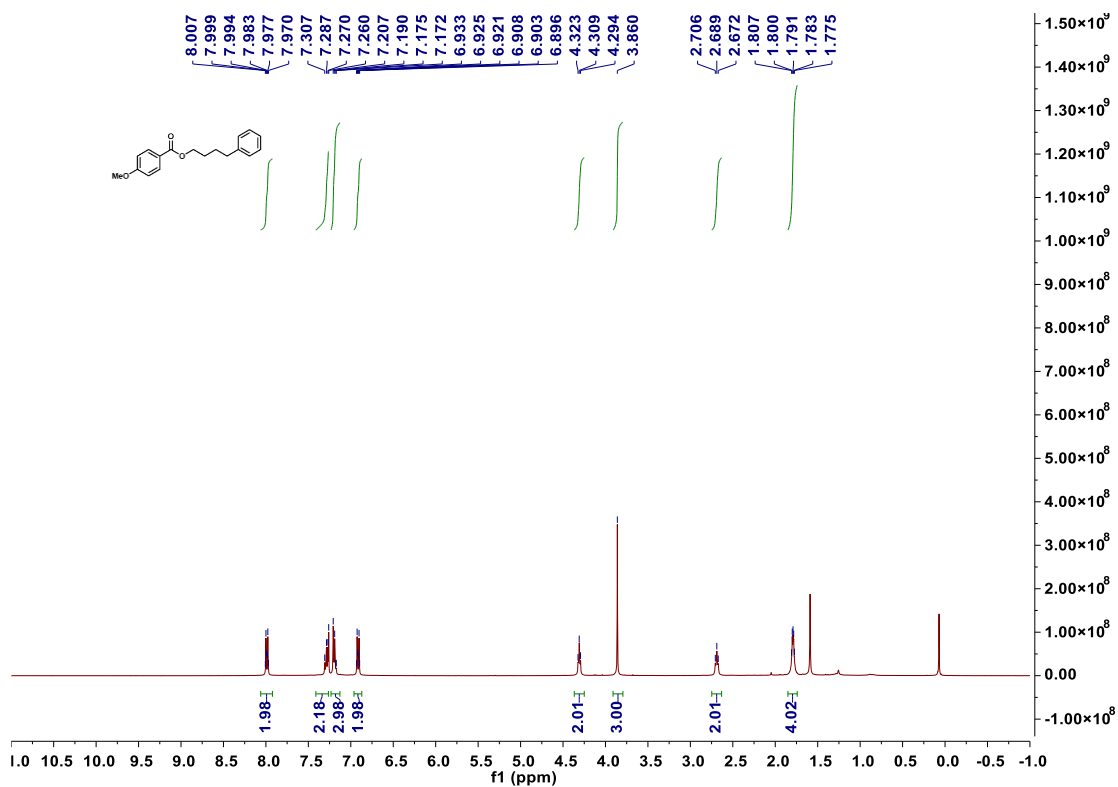

### <sup>13</sup>C NMR-spectrum (100 MHz, CDCl<sub>3</sub>) of **3ad**

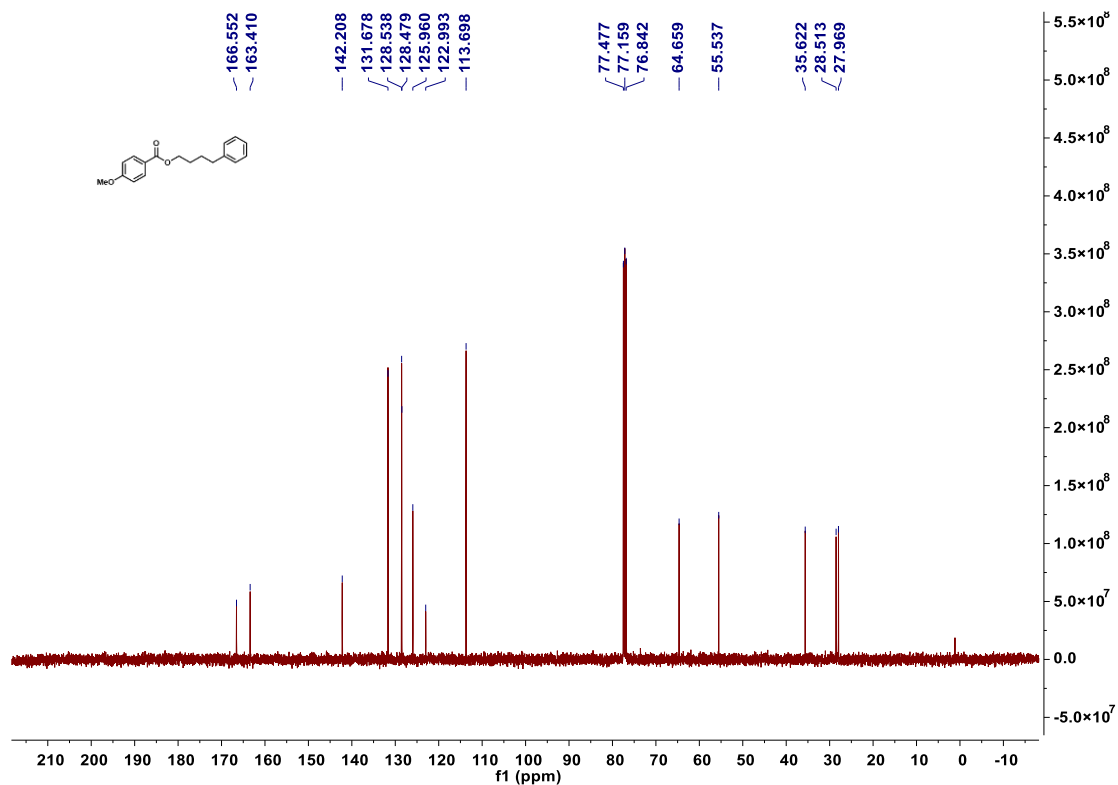

### <sup>1</sup>H NMR-spectrum (400 MHz, CDCl<sub>3</sub>) of 3ae

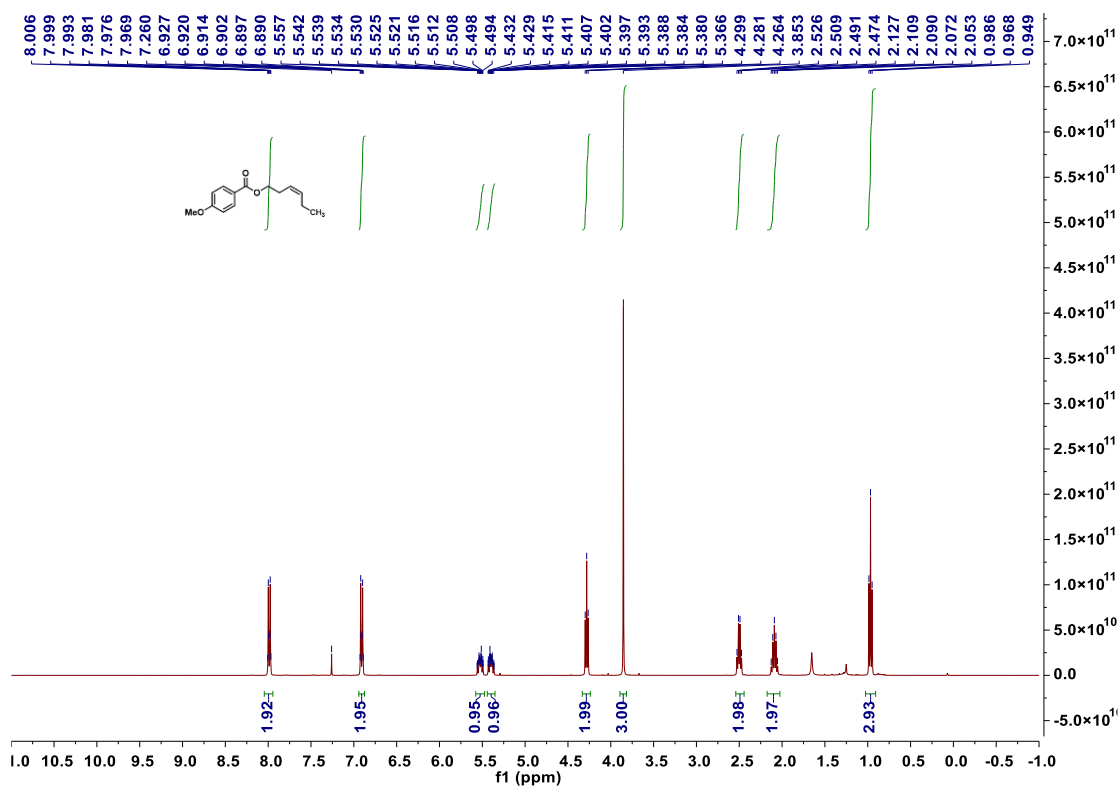

### <sup>13</sup>C NMR-spectrum (100 MHz, CDCl<sub>3</sub>) of 3ae

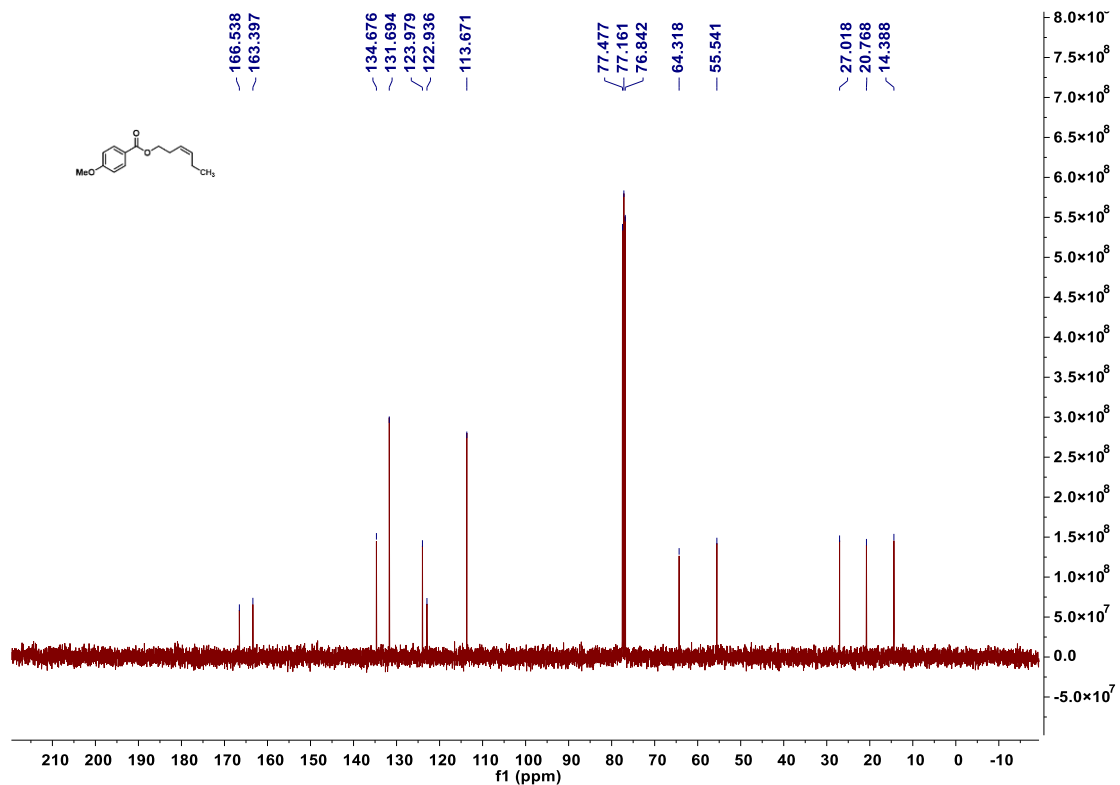

<sup>1</sup>H NMR-spectrum (400 MHz, CDCl<sub>3</sub>) of **3af**

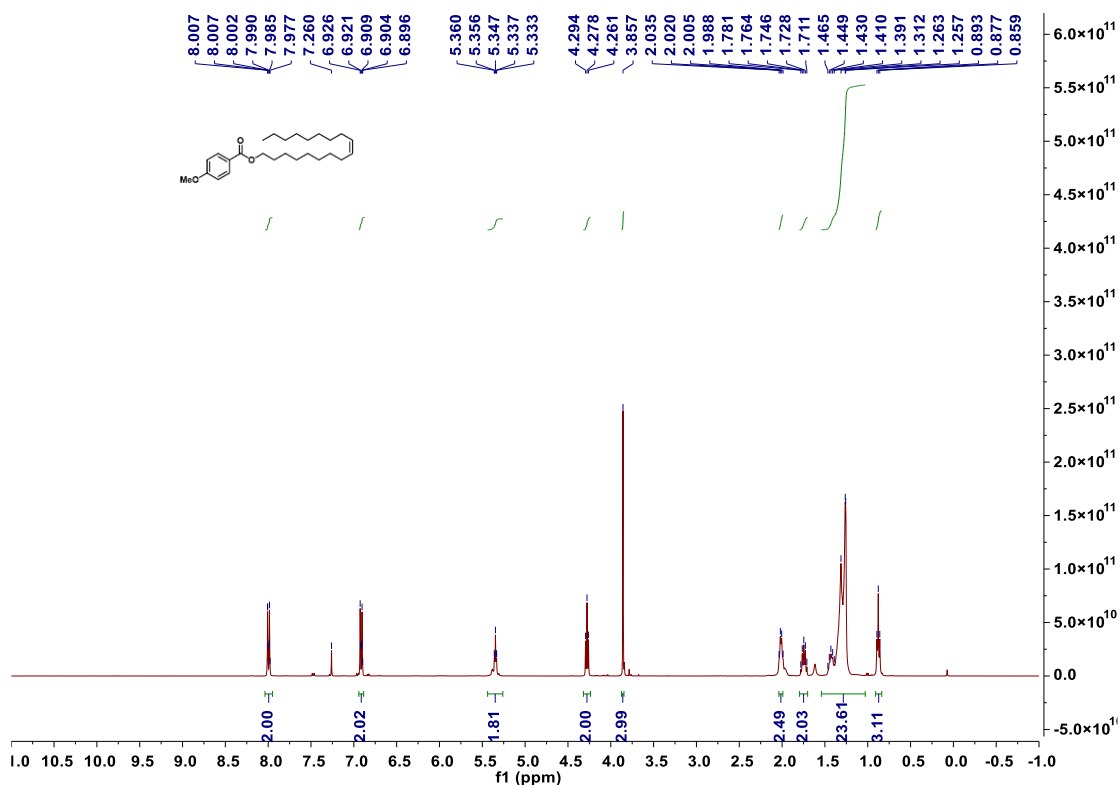

<sup>13</sup>C NMR-spectrum (100 MHz, CDCl<sub>3</sub>) of **3af**

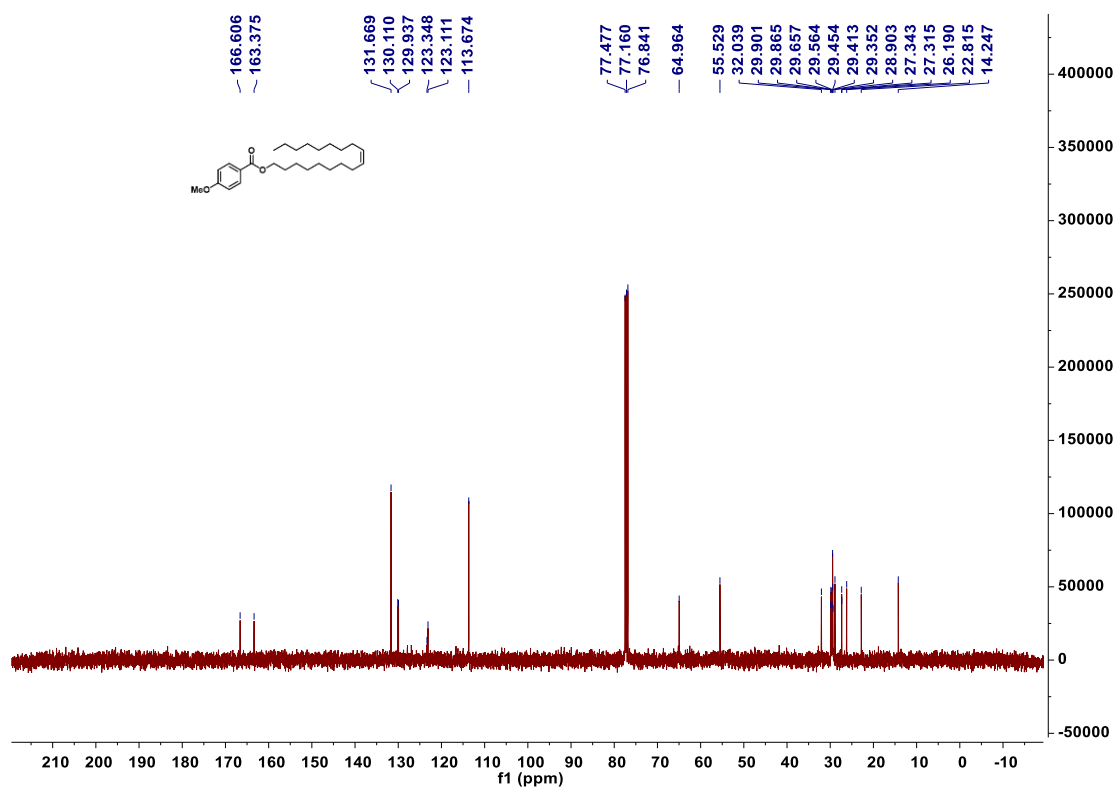



### <sup>1</sup>H NMR-spectrum (400 MHz, CDCl<sub>3</sub>) of **3ag**

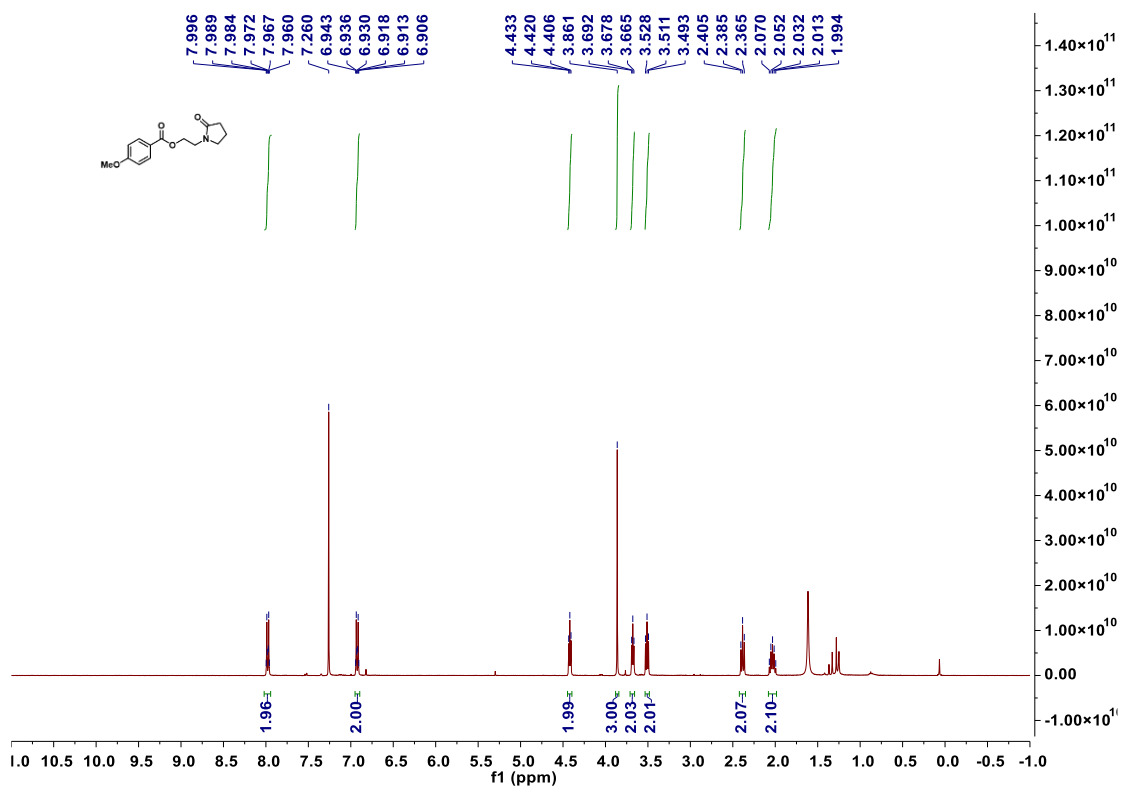

### <sup>13</sup>C NMR-spectrum (100 MHz, CDCl<sub>3</sub>) of **3ag**

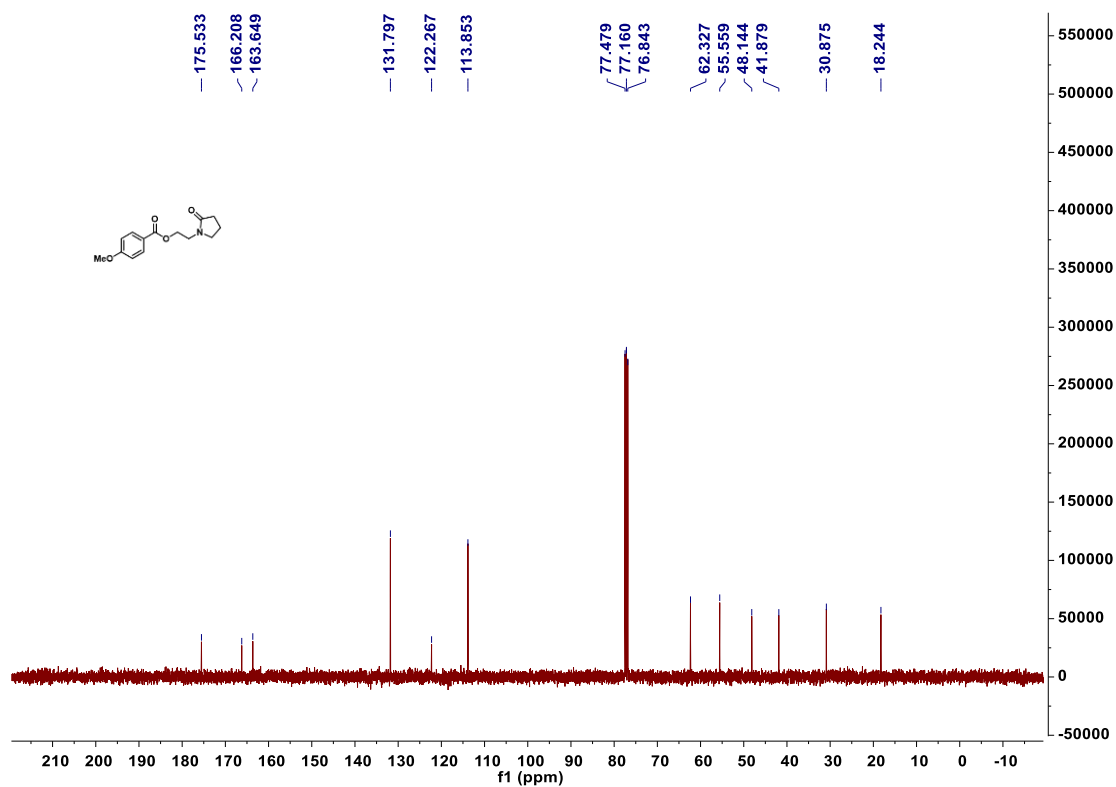

<sup>1</sup>H NMR-spectrum (400 MHz, CDCl<sub>3</sub>) of **3ah**

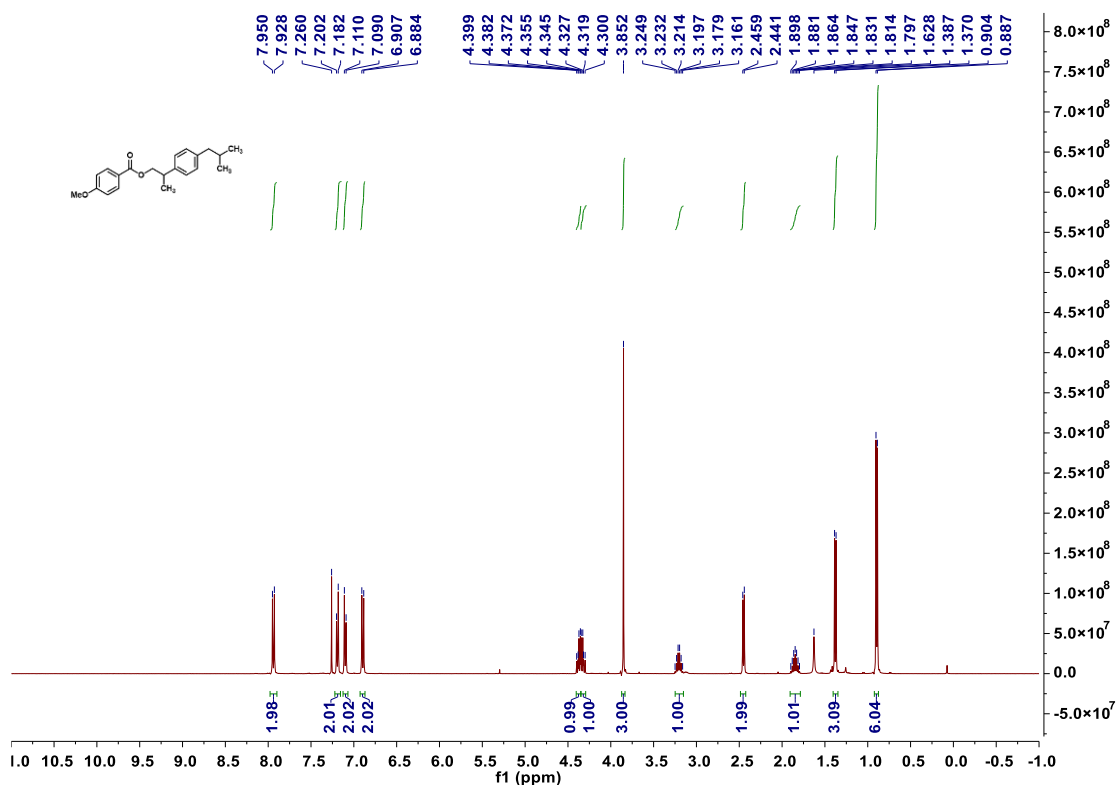

<sup>13</sup>C NMR-spectrum (100 MHz, CDCl<sub>3</sub>) of **3ah**

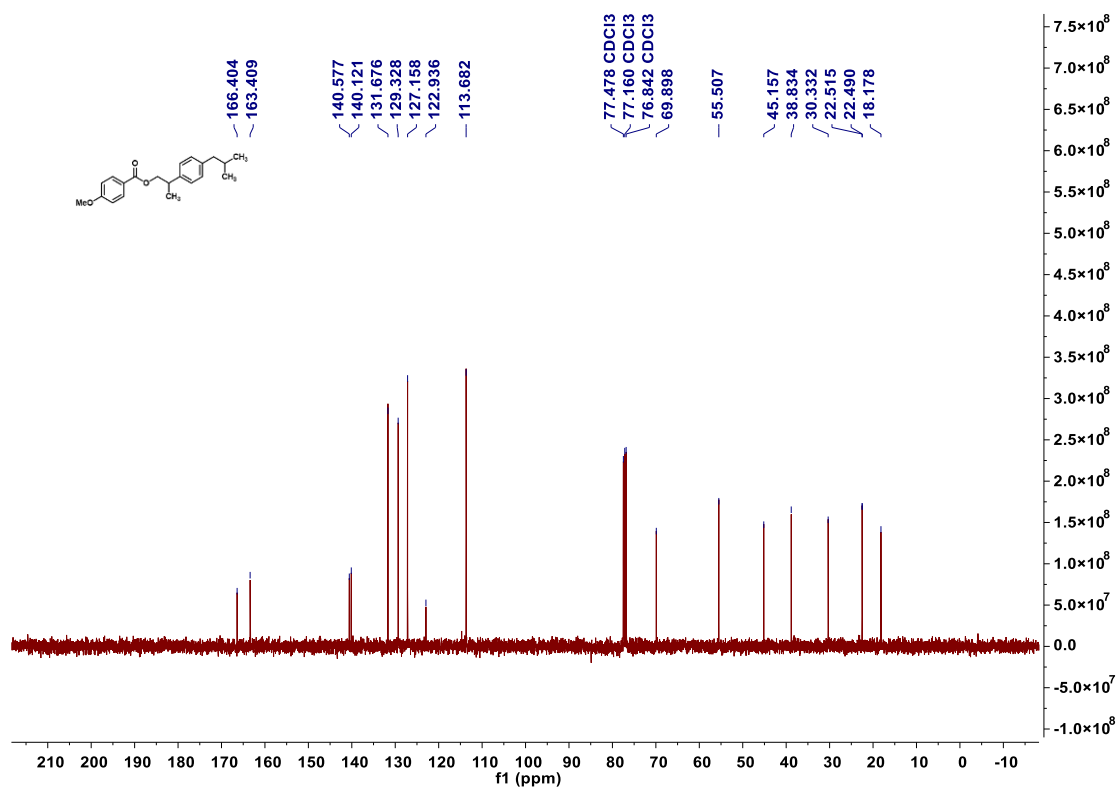

<sup>1</sup>H NMR-spectrum (400 MHz, CDCl<sub>3</sub>) of **3ai**

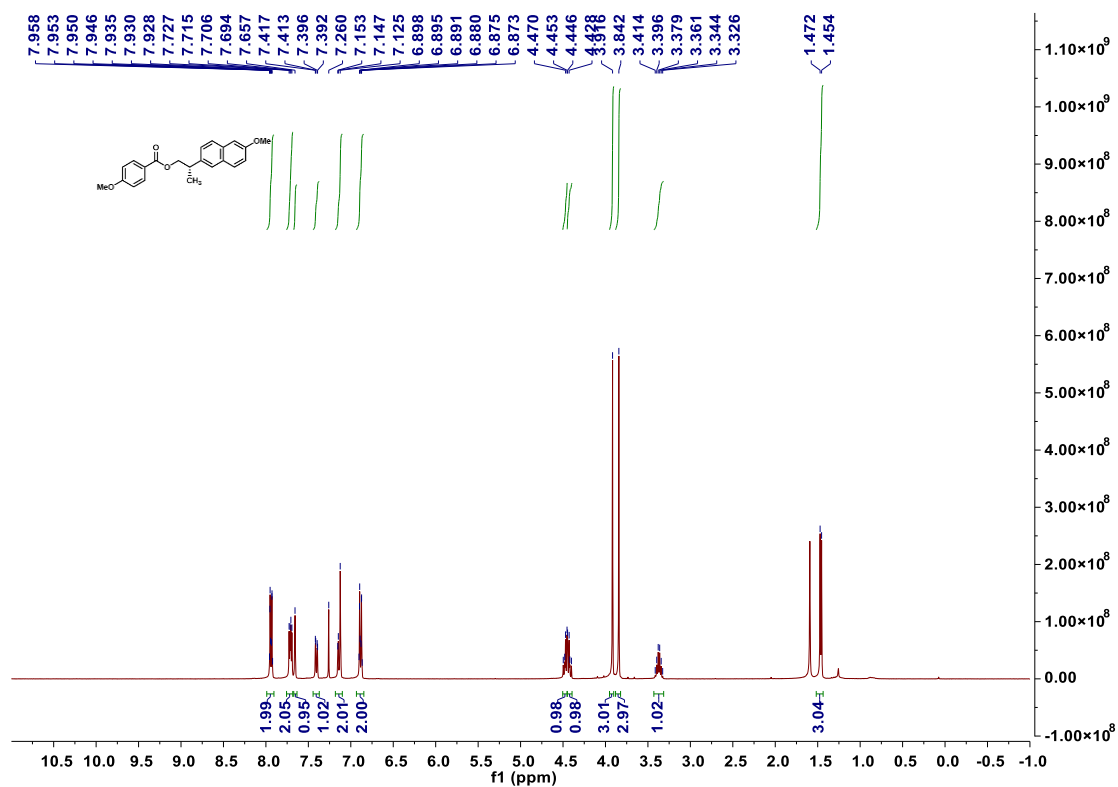

<sup>13</sup>C NMR-spectrum (100 MHz, CDCl<sub>3</sub>) of **3ai**

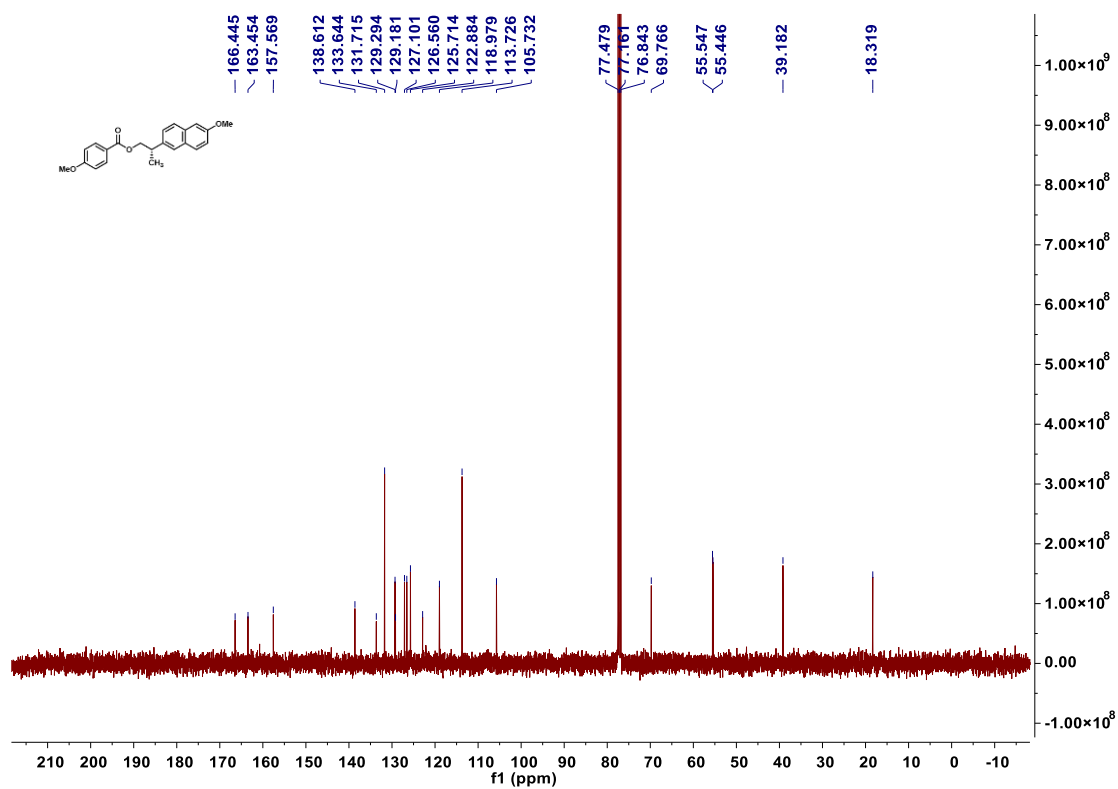

<sup>1</sup>H NMR-spectrum (400 MHz, CDCl<sub>3</sub>) of **3aj**

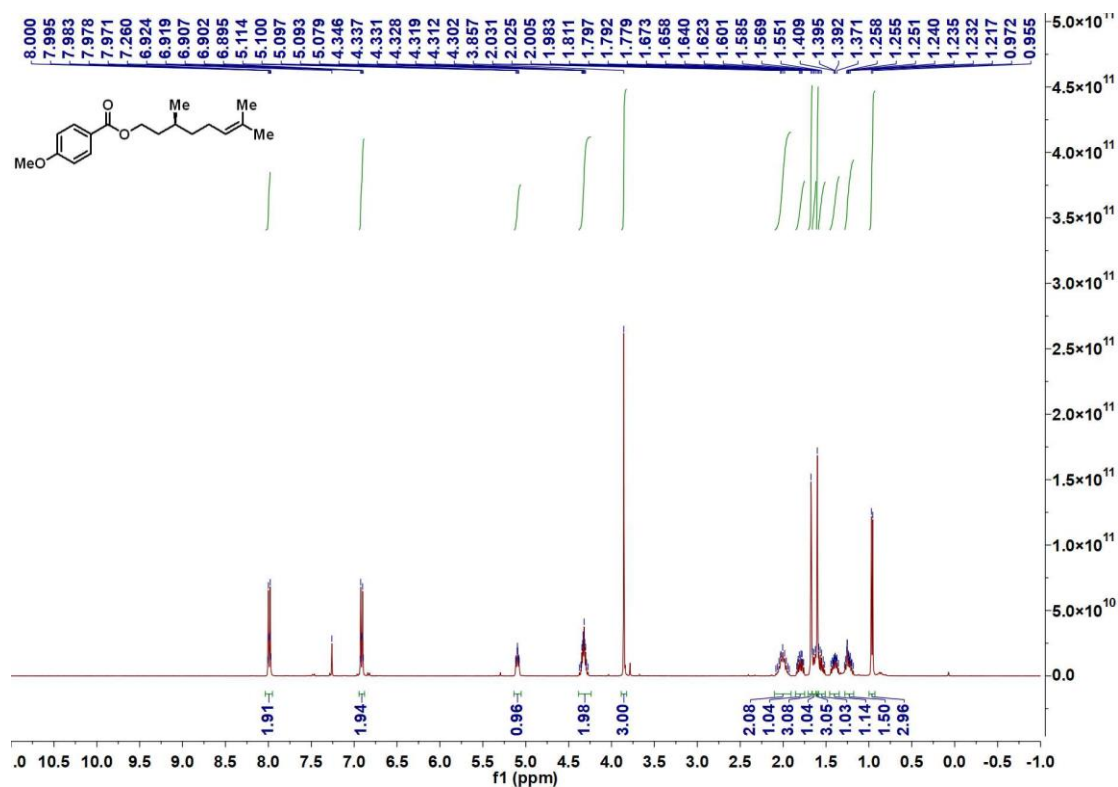

<sup>13</sup>C NMR-spectrum (100 MHz, CDCl<sub>3</sub>) of **3aj**

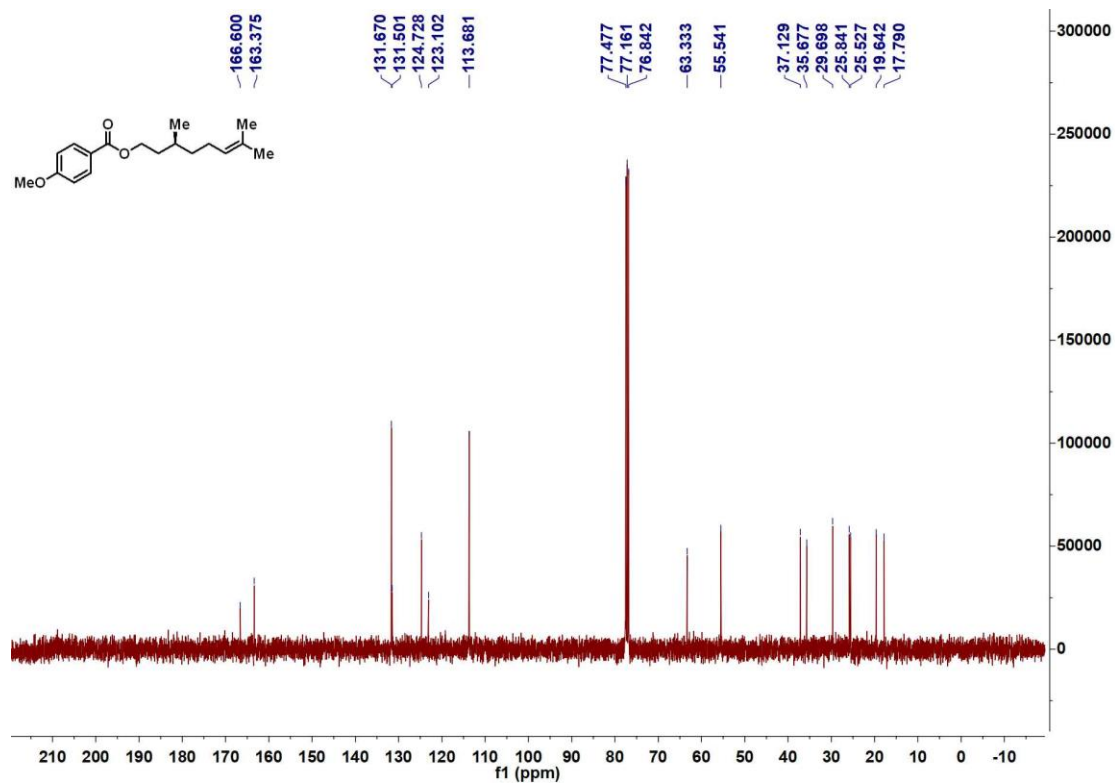

<sup>1</sup>H NMR-spectrum (400 MHz, CDCl<sub>3</sub>) of **3ak**

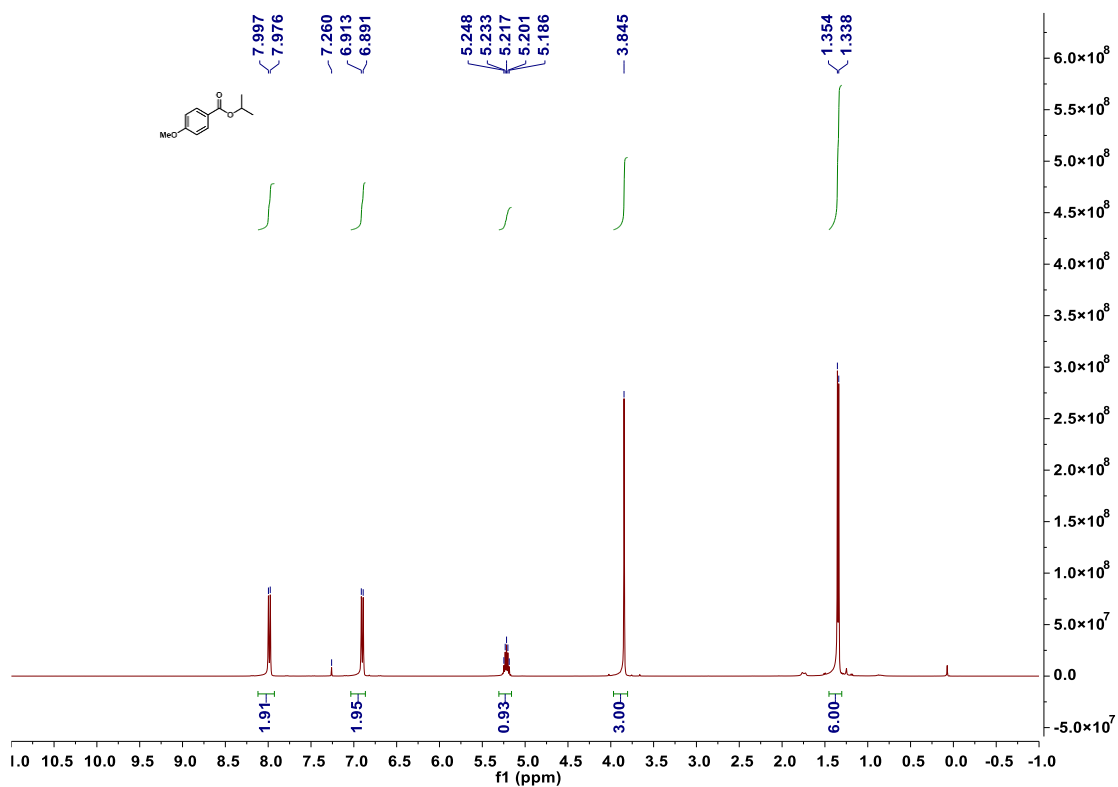

<sup>13</sup>C NMR-spectrum (100 MHz, CDCl<sub>3</sub>) of **3ak**

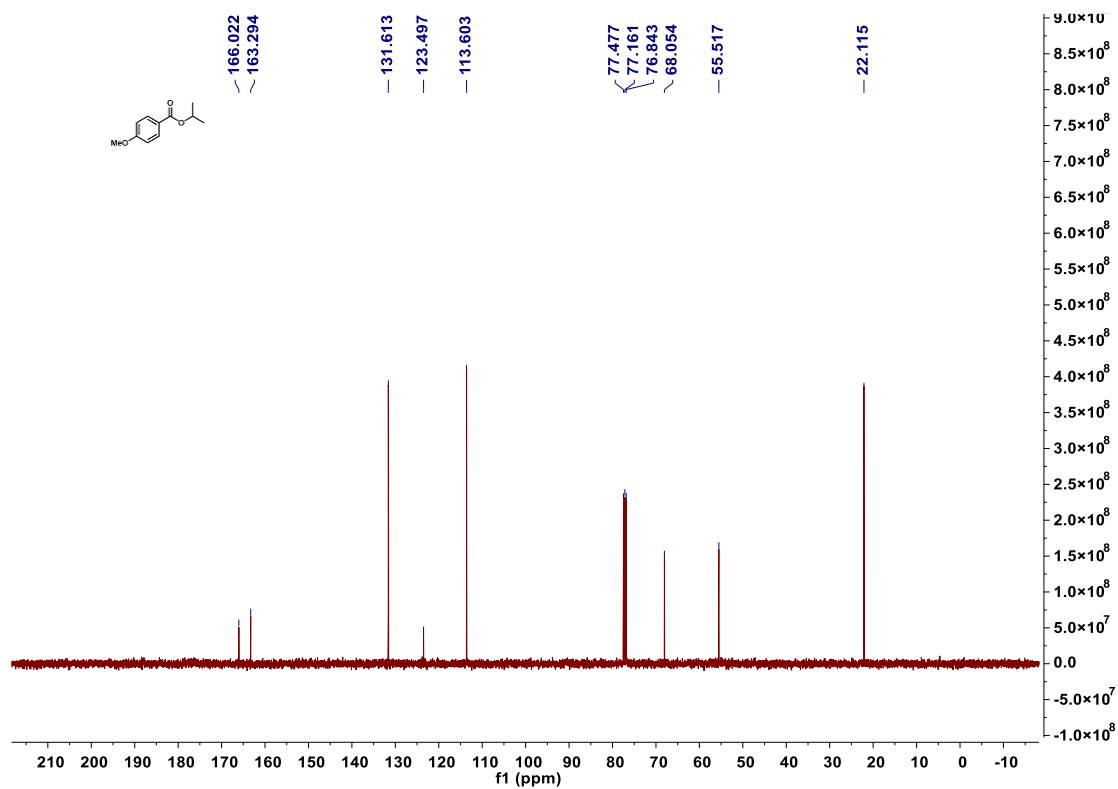

### <sup>1</sup>H NMR-spectrum (400 MHz, CDCl<sub>3</sub>) of **3al**

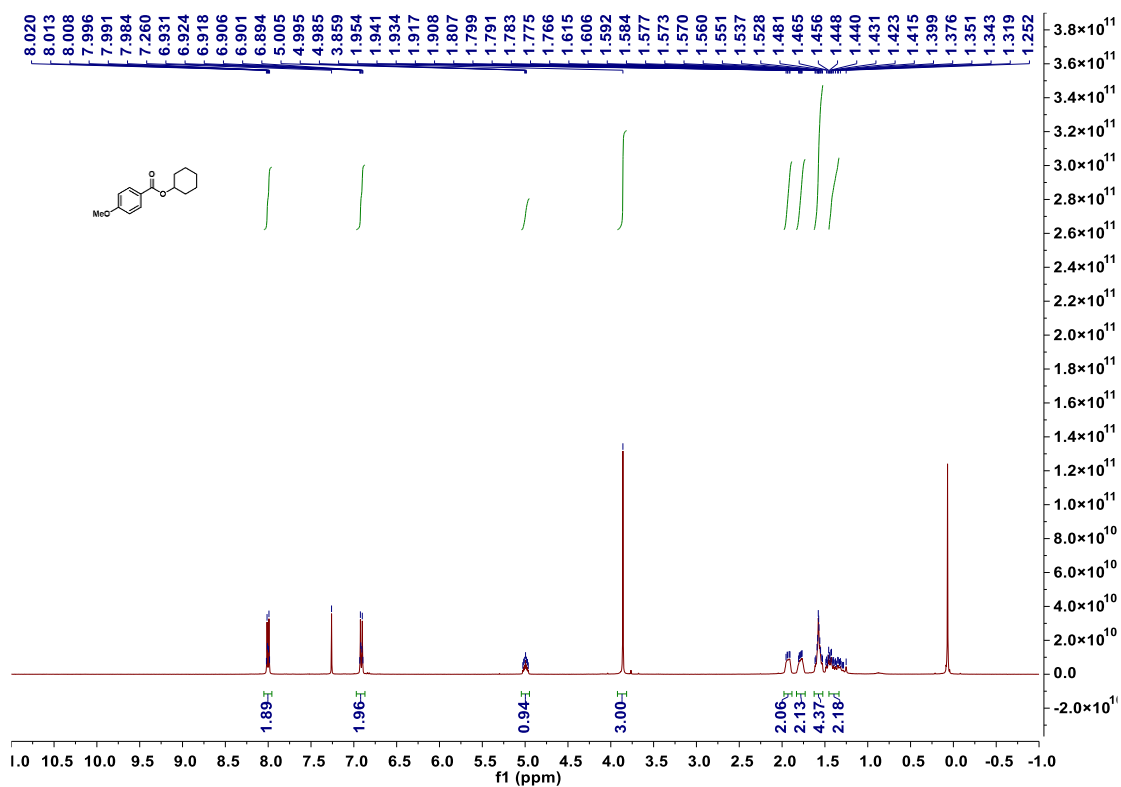

### <sup>13</sup>C NMR-spectrum (100 MHz, CDCl<sub>3</sub>) of **3al**

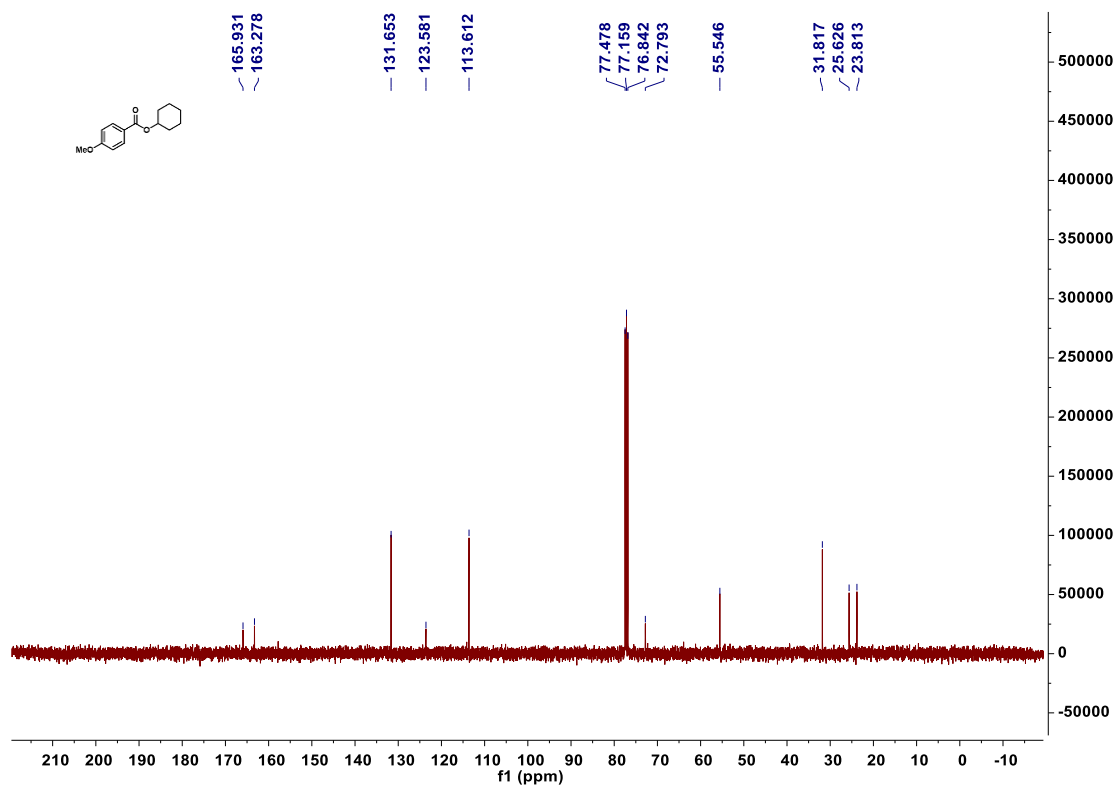

### <sup>1</sup>H NMR-spectrum (400 MHz, CDCl<sub>3</sub>) of **3am**

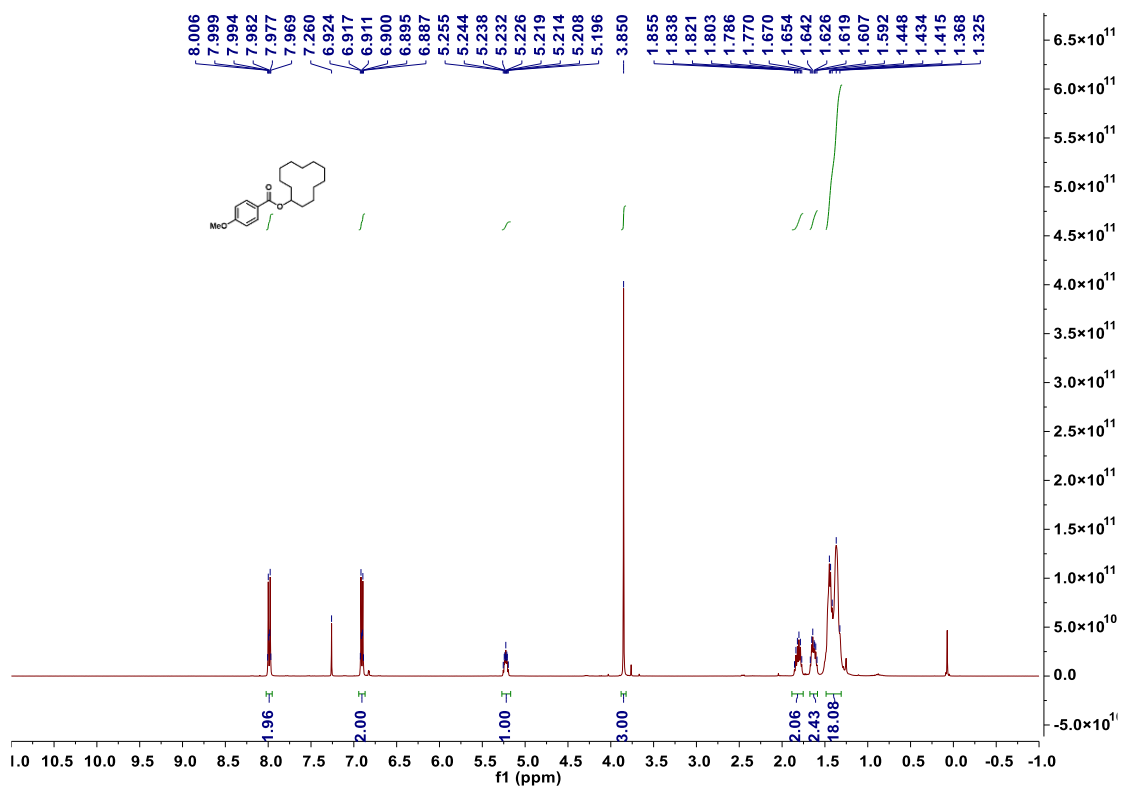

### <sup>13</sup>C NMR-spectrum (100 MHz, CDCl<sub>3</sub>) of **3am**

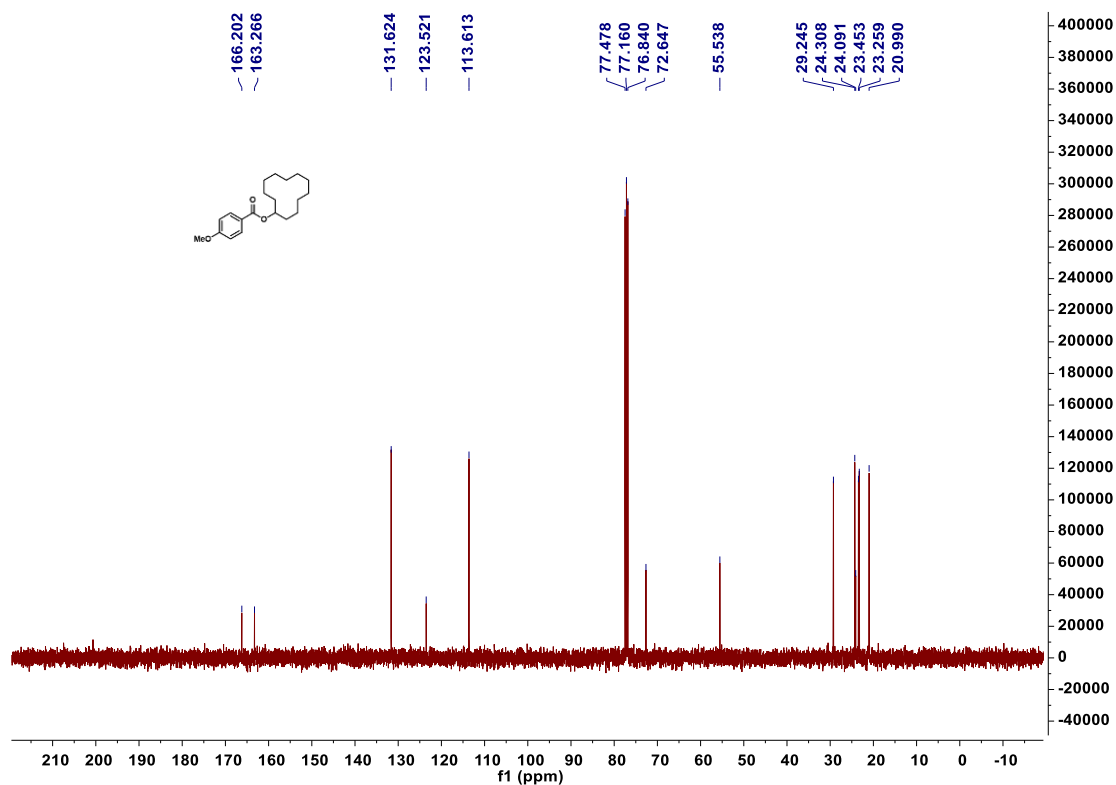

### <sup>1</sup>H NMR-spectrum (400 MHz, CDCl<sub>3</sub>) of **3an**

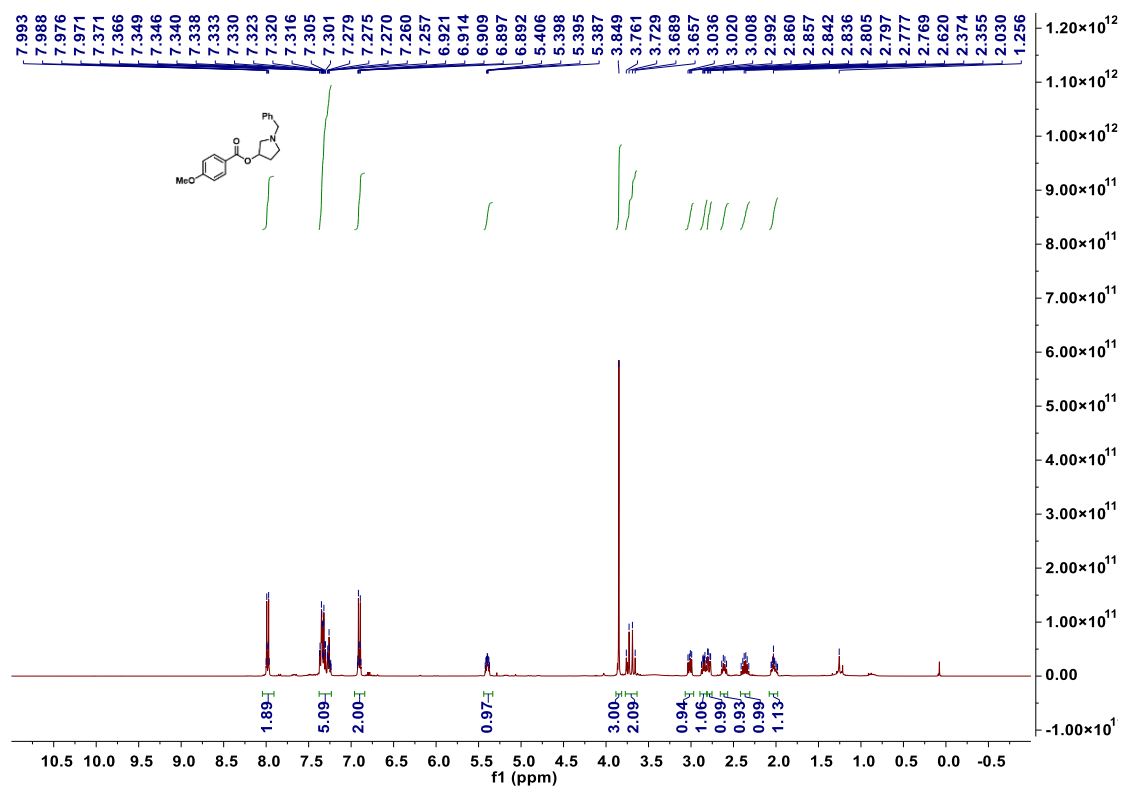

### <sup>13</sup>C NMR-spectrum (100 MHz, CDCl<sub>3</sub>) of **3an**

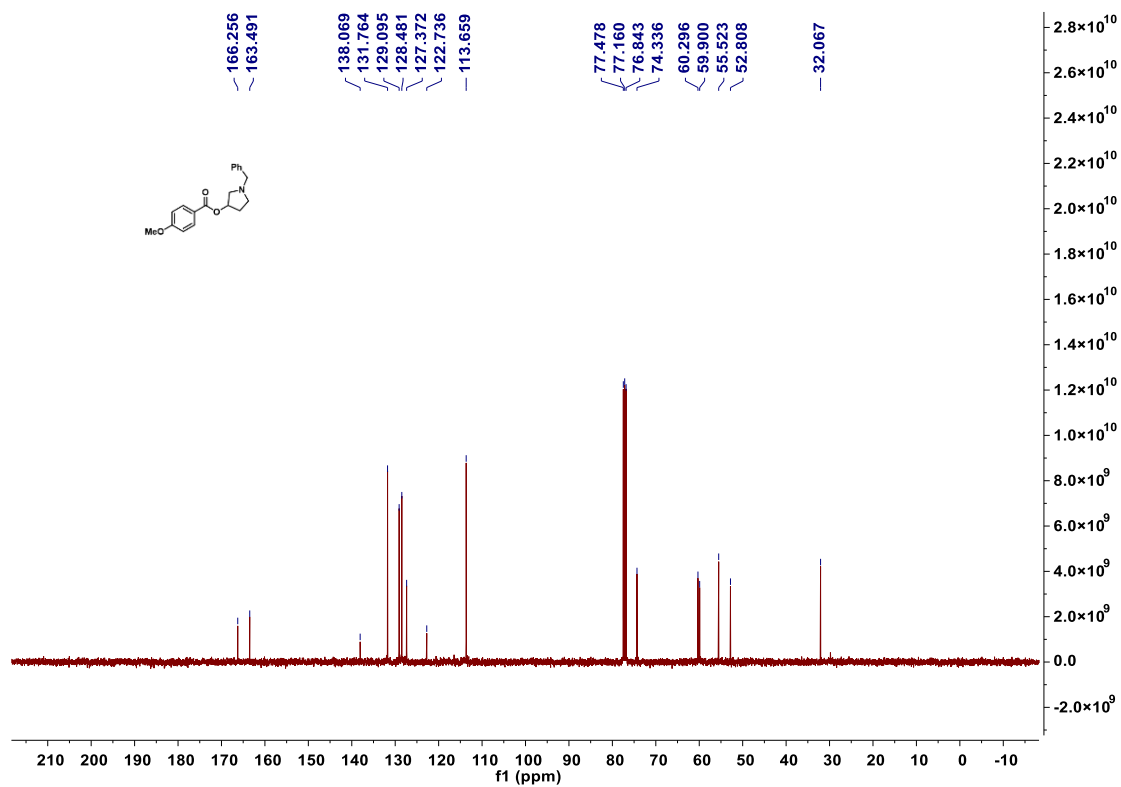



<sup>1</sup>H NMR-spectrum (400 MHz, CDCl<sub>3</sub>) of **3ao**

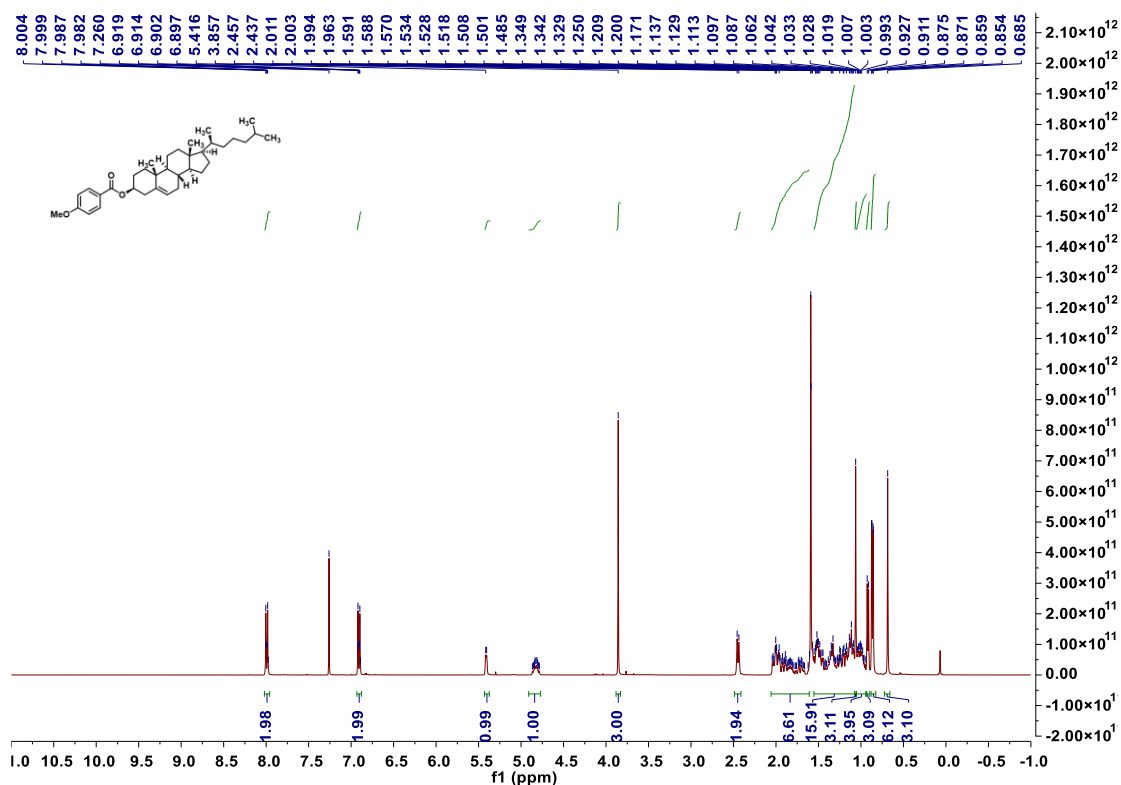

<sup>13</sup>C NMR-spectrum (100 MHz, CDCl<sub>3</sub>) of **3ao**

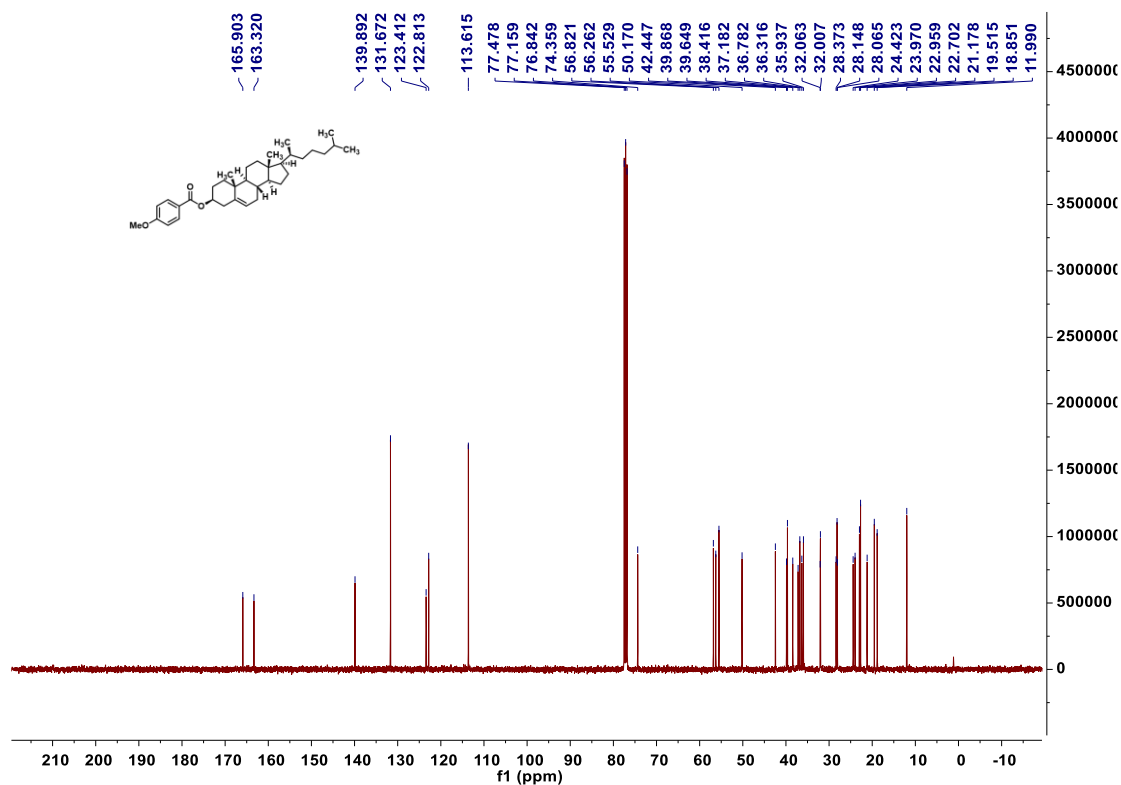

### <sup>1</sup>H NMR-spectrum (400 MHz, CDCl<sub>3</sub>) of 3ap

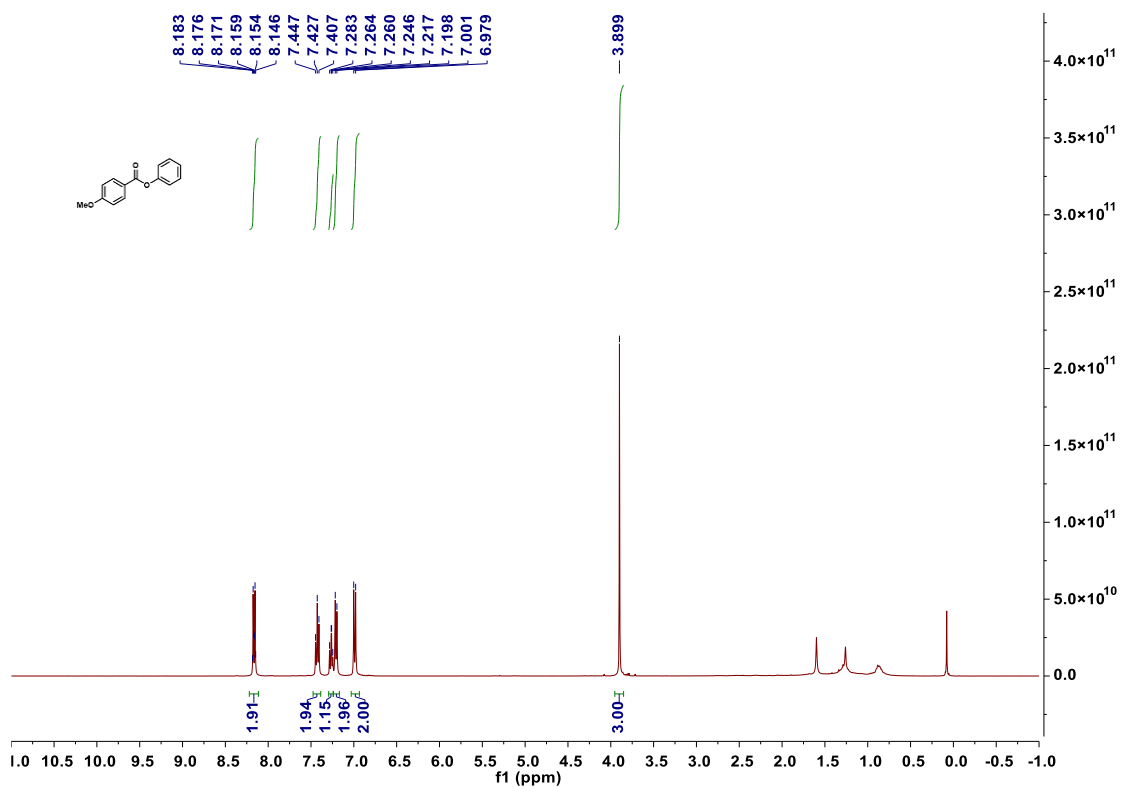

### <sup>13</sup>C NMR-spectrum (100 MHz, CDCl<sub>3</sub>) of 3ap

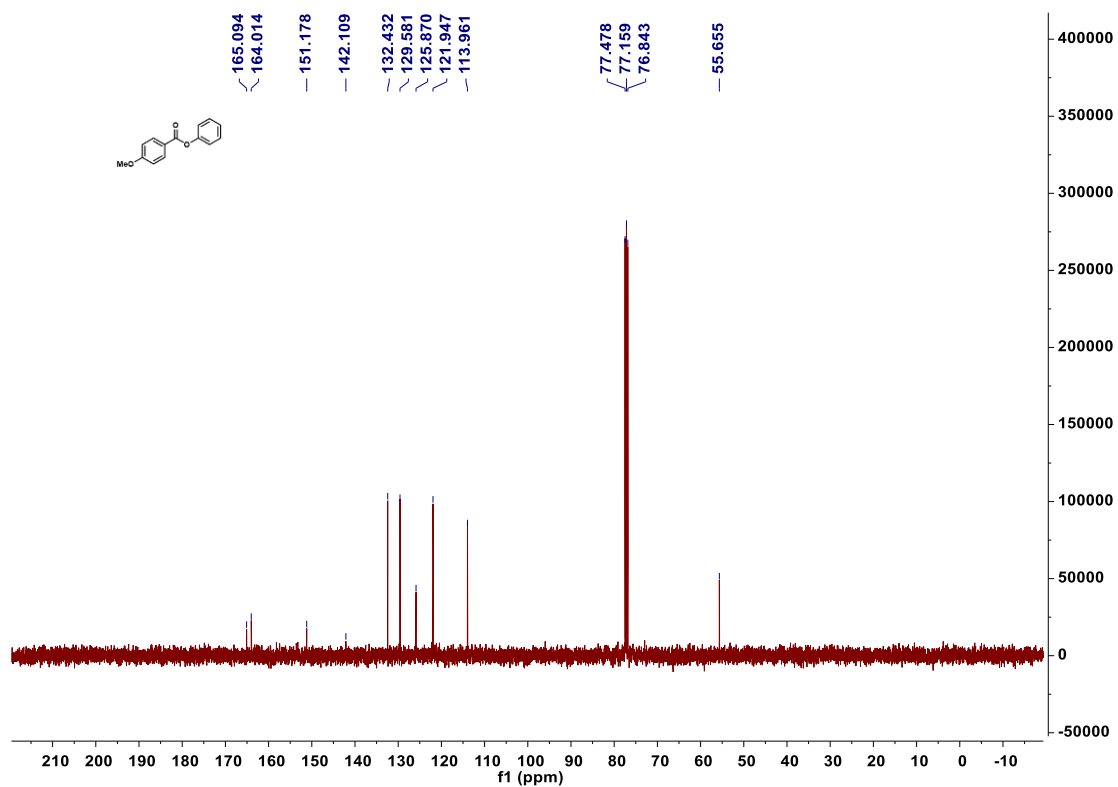

<sup>1</sup>H NMR-spectrum (400 MHz, CDCl<sub>3</sub>) of **3aq**

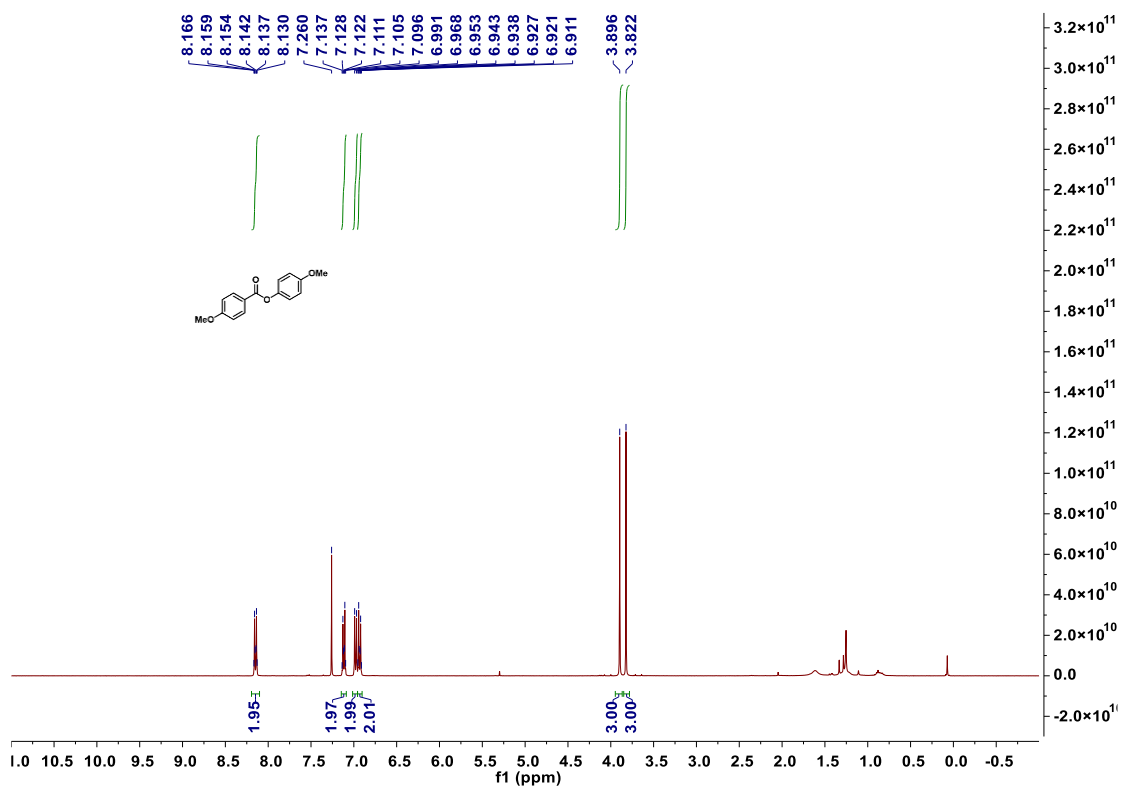

<sup>13</sup>C NMR-spectrum (100 MHz, CDCl<sub>3</sub>) of **3aq**

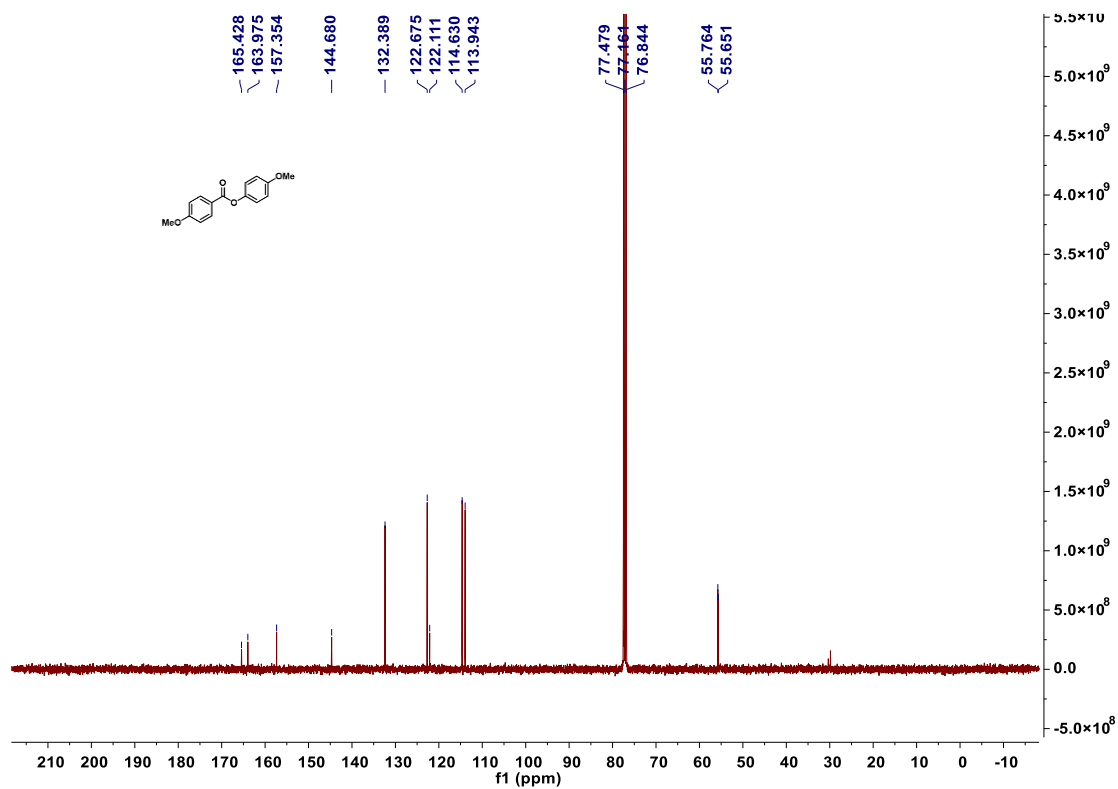

Supplement: d2cc00876a1.pdf [file d2cc00876a1.pdf]
